# Supplementary material
Source: HighWire-hosted journal article supplement (http://www.qdcxjkg.com/highwire/filestream/113589/field_highwire_adjunct_files/0/Gene_list.pdf)
Supplement: Gene_list.pdf [file Gene_list.pdf]

**Supplemental Gene List I. Airway Basal Cell Signature Genes Analyzed**

| <b>Probe ID</b> | <b>Gene name</b>                                                                             | <b>Median of normalized expression levels in lung adenoCa</b> |                 |
|-----------------|----------------------------------------------------------------------------------------------|---------------------------------------------------------------|-----------------|
| 200650_s_at     | lactate dehydrogenase A                                                                      | 57.01                                                         | Above 2x median |
| 201666_at       | TIMP metalloproteinase inhibitor 1                                                           | 51.60                                                         | Above 2x median |
| 200872_at       | S100 calcium binding protein A10                                                             | 44.97                                                         | Above 2x median |
| 211945_s_at     | integrin, beta 1 (fibronectin receptor, beta polypeptide, antigen CD29 includes MDF2, MSK12) | 36.19                                                         | Above 2x median |
| 217466_x_at     | ribosomal protein S2                                                                         | 32.40                                                         | Above 2x median |
| 211936_at       | heat shock 70kDa protein 5 (glucose-regulated protein, 78kDa)                                | 30.89                                                         | Above 2x median |
| 217963_s_at     | nerve growth factor receptor (TNFRSF16) associated protein 1                                 | 29.77                                                         | Above 2x median |
| 208679_s_at     | actin related protein 2/3 complex, subunit 2, 34kDa                                          | 29.23                                                         | Above 2x median |
| 209386_at       | transmembrane 4 L six family member 1                                                        | 28.61                                                         | Above 2x median |
| 211597_s_at     | HOP homeobox                                                                                 | 27.42                                                         | Above 2x median |
| 201215_at       | plastin 3                                                                                    | 27.17                                                         | Above 2x median |
| 200634_at       | profilin 1                                                                                   | 27.14                                                         | Above 2x median |
| 212185_x_at     | metallothionein 2A                                                                           | 24.94                                                         | Above 2x median |
| 201105_at       | lectin, galactoside-binding, soluble, 1                                                      | 24.82                                                         | Above 2x median |
| 217294_s_at     | enolase 1, (alpha)                                                                           | 23.20                                                         | Above 2x median |
| 200989_at       | hypoxia inducible factor 1, alpha subunit (basic helix-loop-helix transcription factor)      | 22.58                                                         | Above 2x median |
| 200700_s_at     | KDEL (Lys-Asp-Glu-Leu) endoplasmic reticulum protein retention receptor 2                    | 20.86                                                         | Above 2x median |
| 201268_at       | NME1-NME2 readthrough / non-metastatic cells 2, protein (NM23B) expressed in                 | 20.20                                                         | Above 2x median |
| 200600_at       | moesin                                                                                       | 19.30                                                         | Above 2x median |
| 200886_s_at     | phosphoglycerate mutase 1 (brain)                                                            | 19.10                                                         | Above 2x median |
| 201818_at       | lysophosphatidylcholine acyltransferase 1                                                    | 18.96                                                         | Above 2x median |
| 211980_at       | collagen, type IV, alpha 1                                                                   | 18.70                                                         | Above 2x median |
| 222229_x_at     | ribosomal protein L26                                                                        | 18.66                                                         | Above 2x median |
| 200779_at       | activating transcription factor 4 (tax-responsive enhancer element B67)                      | 18.48                                                         | Above 2x median |
| 200625_s_at     | CAP, adenylate cyclase-associated protein 1 (yeast)                                          | 17.90                                                         | Above 2x median |
| 208700_s_at     | transketolase                                                                                | 17.61                                                         | Above 2x median |
| 214853_s_at     | SHC (Src homology 2 domain containing) transforming protein 1                                | 17.28                                                         | Above 2x median |
| 201069_at       | matrix metalloproteinase 2 (gelatinase A, 72kDa gelatinase, 72kDa type IV collagenase)       | 17.09                                                         | Above 2x median |

**Supplemental Gene List I. Airway Basal Cell Signature Genes Analyzed (cont. page 2)**

| <b>Probe ID</b> | <b>Gene name</b>                                            | <b>Median of normalized expression levels in lung adenoCa</b> |                 |
|-----------------|-------------------------------------------------------------|---------------------------------------------------------------|-----------------|
| 200632_s_at     | N-myc downstream regulated 1                                | 16.88                                                         | Above 2x median |
| 203108_at       | G protein-coupled receptor, family C, group 5, member A     | 16.47                                                         | Above 2x median |
| 210986_s_at     | tropomyosin 1 (alpha)                                       | 16.04                                                         | Above 2x median |
| 218205_s_at     | MAP kinase interacting serine/threonine kinase 2            | 15.99                                                         | Above 2x median |
| 208540_x_at     | S100 calcium binding protein A11                            | 15.83                                                         | Above 2x median |
| 209373_at       | mal, T-cell differentiation protein-like                    | 15.08                                                         | Above 2x median |
| 220924_s_at     | solute carrier family 38, member 2                          | 14.79                                                         | Above 2x median |
| 211964_at       | collagen, type IV, alpha 2                                  | 14.78                                                         | Above 2x median |
| 208581_x_at     | metallothionein 1X                                          | 14.74                                                         | Above 2x median |
| 212859_x_at     | metallothionein 1E                                          | 14.53                                                         | Above 2x median |
| 200931_s_at     | vinculin                                                    | 14.42                                                         | Above 2x median |
| 216241_s_at     | transcription elongation factor A (SII), 1                  | 14.25                                                         | Above 2x median |
| 209154_at       | Tax1 (human T-cell leukemia virus type I) binding protein 3 | 13.96                                                         | Above 2x median |
| 216640_s_at     | protein disulfide isomerase family A, member 6              | 13.95                                                         | Above 2x median |
| 201150_s_at     | TIMP metalloproteinase inhibitor 3                          | 13.42                                                         | Above 2x median |
| 208892_s_at     | dual specificity phosphatase 6                              | 13.23                                                         | Above 2x median |
| 200999_s_at     | cytoskeleton-associated protein 4                           | 13.15                                                         | Above 2x median |
| 202442_at       | adaptor-related protein complex 3, sigma 1 subunit          | 13.14                                                         | Above 2x median |
| 221923_s_at     | nucleophosmin (nucleolar phosphoprotein B23, numatrin)      | 13.07                                                         | Above 2x median |
| 220755_s_at     | chromosome 6 open reading frame 48                          | 12.97                                                         | Above 2x median |
| 209016_s_at     | keratin 7                                                   | 12.68                                                         | Above 2x median |
| 201286_at       | syndecan 1                                                  | 12.62                                                         | Above 2x median |
| 201416_at       | SRY (sex determining region Y)-box 4                        | 12.56                                                         | Above 2x median |
| 201506_at       | transforming growth factor, beta-induced, 68kDa             | 12.40                                                         | Above 2x median |
| 203484_at       | Sec61 gamma subunit                                         | 12.27                                                         | Above 2x median |
| 207738_s_at     | NCK-associated protein 1                                    | 12.25                                                         | Above 2x median |
| 210512_s_at     | vascular endothelial growth factor A                        | 12.16                                                         | Above 2x median |
| 208152_s_at     | DEAD (Asp-Glu-Ala-Asp) box polypeptide 21                   | 12.14                                                         | Above 2x median |
| 200788_s_at     | phosphoprotein enriched in astrocytes 15                    | 12.04                                                         | Above 2x median |
| 201631_s_at     | immediate early response 3                                  | 12.02                                                         | Above 2x median |
| 219293_s_at     | Obg-like ATPase 1                                           | 11.69                                                         | Above 2x median |
| 208636_at       | actinin, alpha 1                                            | 11.60                                                         | Above 2x median |
| 214091_s_at     | glutathione peroxidase 3 (plasma)                           | 11.51                                                         | Above 2x median |
| 200870_at       | serine/threonine kinase receptor associated protein         | 11.43                                                         | Above 2x median |
| 201577_at       | non-metastatic cells 1, protein (NM23A) expressed in        | 11.38                                                         | Above 2x median |
| 200790_at       | ornithine decarboxylase 1                                   | 11.21                                                         | Above 2x median |
| 200743_s_at     | tripeptidyl peptidase I                                     | 10.95                                                         | Above 2x median |

**Supplemental Gene List I. Airway Basal Cell Signature Genes Analyzed (cont. page 3)**

| <b>Probe ID</b> | <b>Gene name</b>                                                                                    | <b>Median of normalized expression levels in lung adenoCa</b> |                 |
|-----------------|-----------------------------------------------------------------------------------------------------|---------------------------------------------------------------|-----------------|
| 201828_x_at     | family with sequence similarity 127, member A                                                       | 10.91                                                         | Above 2x median |
| 208726_s_at     | eukaryotic translation initiation factor 2, subunit 2 beta, 38kDa                                   | 10.69                                                         | Above 2x median |
| 208693_s_at     | glycyl-tRNA synthetase                                                                              | 10.49                                                         | Above 2x median |
| 218084_x_at     | FXFD domain containing ion transport regulator 5                                                    | 10.42                                                         | Above 2x median |
| 200606_at       | desmoplakin                                                                                         | 10.38                                                         | Above 2x median |
| 208801_at       | signal recognition particle 72kDa                                                                   | 10.01                                                         | Above 2x median |
| 222231_s_at     | leucine rich repeat containing 59                                                                   | 9.96                                                          | Above 2x median |
| 208886_at       | H1 histone family, member 0                                                                         | 9.95                                                          | Above 2x median |
| 200885_at       | ras homolog gene family, member C                                                                   | 9.91                                                          | Above 2x median |
| 213404_s_at     | Ras homolog enriched in brain                                                                       | 9.87                                                          | Above 2x median |
| 211284_s_at     | granulin                                                                                            | 9.85                                                          | Above 2x median |
| 208161_s_at     | ATP-binding cassette, sub-family C (CFTR/MRP), member 3                                             | 9.71                                                          | Above 2x median |
| 212473_s_at     | microtubule associated monooxygenase, calponin and LIM domain containing 2                          | 9.63                                                          | Above 2x median |
| 200771_at       | laminin, gamma 1 (formerly LAMB2)                                                                   | 9.60                                                          | Above 2x median |
| 201587_s_at     | interleukin-1 receptor-associated kinase 1                                                          | 9.54                                                          | Above 2x median |
| 200853_at       | H2A histone family, member Z                                                                        | 9.54                                                          | Above 2x median |
| 201560_at       | chloride intracellular channel 4                                                                    | 9.51                                                          | Above 2x median |
| 201015_s_at     | junction plakoglobin                                                                                | 9.50                                                          | Above 2x median |
| 213603_s_at     | ras-related C3 botulinum toxin substrate 2 (rho family, small GTP binding protein Rac2)             | 9.42                                                          | Above 2x median |
| 211456_x_at     | metallothionein 1 pseudogene 2                                                                      | 9.37                                                          | Above 2x median |
| 202231_at       | eukaryotic translation initiation factor 3, subunit M                                               | 9.30                                                          | Above 2x median |
| 212265_at       | quaking homolog, KH domain RNA binding (mouse)                                                      | 9.14                                                          | Above 2x median |
| 201667_at       | gap junction protein, alpha 1, 43kDa                                                                | 9.06                                                          | Above 2x median |
| 221739_at       | chromosome 19 open reading frame 10                                                                 | 9.06                                                          | Above 2x median |
| 217938_s_at     | potassium channel modulatory factor 1                                                               | 9.02                                                          | Above 2x median |
| 202720_at       | testis derived transcript (3 LIM domains)                                                           | 9.02                                                          | Above 2x median |
| 217975_at       | WW domain binding protein 5                                                                         | 8.94                                                          | Above 2x median |
| 201189_s_at     | inositol 1,4,5-triphosphate receptor, type 3                                                        | 8.81                                                          | Above 2x median |
| 201088_at       | karyopherin alpha 2 (RAG cohort 1, importin alpha 1)                                                | 8.75                                                          | Above 2x median |
| 207714_s_at     | serpin peptidase inhibitor, clade H (heat shock protein 47), member 1, (collagen binding protein 1) | 8.63                                                          | Above 2x median |
| 205569_at       | lysosomal-associated membrane protein 3                                                             | 8.59                                                          | Above 2x median |
| 216396_s_at     | etoposide induced 2.4 mRNA                                                                          | 8.58                                                          | Above 2x median |
| 212995_x_at     | mitotic spindle organizing protein 2B                                                               | 8.54                                                          | Above 2x median |

**Supplemental Gene List I. Airway Basal Cell Signature Genes Analyzed (cont. page 4)**

| <b>Probe ID</b> | <b>Gene name</b>                                                      | <b>Median of normalized expression levels in lung adenoCa</b> |                 |
|-----------------|-----------------------------------------------------------------------|---------------------------------------------------------------|-----------------|
| 217995_at       | sulfide quinone reductase-like (yeast)                                | 8.47                                                          | Above 2x median |
| 201064_s_at     | poly(A) binding protein, cytoplasmic 4 (inducible form)               | 8.46                                                          | Above 2x median |
| 210406_s_at     | RAB6A, member RAS oncogene family / RAB6C, member RAS oncogene family | 8.37                                                          | Above 2x median |
| 203744_at       | high-mobility group box 3                                             | 8.32                                                          | Above 2x median |
| 201300_s_at     | prion protein                                                         | 8.22                                                          | Above 2x median |
| 203510_at       | met proto-oncogene (hepatocyte growth factor receptor)                | 8.14                                                          | Above 2x median |
| 206461_x_at     | metallothionein 1H                                                    | 8.04                                                          | Above 2x median |
| 216449_x_at     | heat shock protein 90kDa beta (Grp94), member 1                       | 7.99                                                          | Above 2x median |
| 212610_at       | protein tyrosine phosphatase, non-receptor type 11                    | 7.92                                                          | Above 2x median |
| 218718_at       | platelet derived growth factor C                                      | 7.92                                                          | Above 2x median |
| 202525_at       | protease, serine, 8                                                   | 7.78                                                          | Above 2x median |
| 221269_s_at     | SH3 domain binding glutamic acid-rich protein like 3                  | 7.78                                                          | Above 2x median |
| 201921_at       | guanine nucleotide binding protein (G protein), gamma 10              | 7.60                                                          | Above 2x median |
| 201319_at       | myosin, light chain 12A, regulatory, non-sarcomeric                   | 7.58                                                          | Above 2x median |
| 212086_x_at     | lamin A/C                                                             | 7.58                                                          | Above 2x median |
| 200802_at       | seryl-tRNA synthetase                                                 | 7.56                                                          | Above 2x median |
| 202655_at       | mesencephalic astrocyte-derived neurotrophic factor                   | 7.52                                                          | Above 2x median |
| 203476_at       | trophoblast glycoprotein                                              | 7.43                                                          | Above 2x median |
| 200832_s_at     | stearoyl-CoA desaturase (delta-9-desaturase)                          | 7.22                                                          | Above 2x median |
| 218618_s_at     | fibronectin type III domain containing 3B                             | 7.20                                                          | Above 2x median |
| 217901_at       | desmoglein 2                                                          | 7.18                                                          | Above 2x median |
| 213923_at       | RAP2B, member of RAS oncogene family                                  | 7.13                                                          | Above 2x median |
| 201272_at       | aldo-keto reductase family 1, member B1 (aldose reductase)            | 7.10                                                          | Above 2x median |
| 217730_at       | transmembrane BAX inhibitor motif containing 1                        | 7.06                                                          | Above 2x median |
| 209786_at       | high mobility group nucleosomal binding domain 4                      | 6.93                                                          | Above 2x median |
| 218368_s_at     | tumor necrosis factor receptor superfamily, member 12A                | 6.93                                                          | Above 2x median |
| 202381_at       | ADAM metalloproteinase domain 9                                       | 6.86                                                          | Above 2x median |
| 201540_at       | four and a half LIM domains 1                                         | 6.85                                                          | Above 2x median |
| 201655_s_at     | heparan sulfate proteoglycan 2                                        | 6.82                                                          | Above 2x median |
| 201850_at       | capping protein (actin filament), gelsolin-like                       | 6.80                                                          | Above 2x median |
| 208727_s_at     | cell division cycle 42 (GTP binding protein, 25kDa)                   | 6.78                                                          | Above 2x median |
| 216336_x_at     | hypothetical protein LOC100505584 / metallothionein 1E                | 6.76                                                          | Above 2x median |
| 204745_x_at     | metallothionein 1G                                                    | 6.71                                                          | Above 2x median |
| 32811_at        | myosin IC                                                             | 6.70                                                          | Above 2x median |
| 201144_s_at     | eukaryotic translation initiation factor 2, subunit 1 alpha, 35kDa    | 6.64                                                          | Above 2x median |

**Supplemental Gene List I. Airway Basal Cell Signature Genes Analyzed (cont. page 5)**

| <b>Probe ID</b> | <b>Gene name</b>                                                                                     | <b>Median of normalized expression levels in lung adenoCa</b> |                 |
|-----------------|------------------------------------------------------------------------------------------------------|---------------------------------------------------------------|-----------------|
| 201393_s_at     | insulin-like growth factor 2 receptor                                                                | 6.63                                                          | Above 2x median |
| 216505_x_at     | ribosomal protein S10                                                                                | 6.48                                                          | Above 2x median |
| 212048_s_at     | tyrosyl-tRNA synthetase                                                                              | 6.47                                                          | Above 2x median |
| 213746_s_at     | filamin A, alpha                                                                                     | 6.30                                                          | Above 2x median |
| 209181_s_at     | Rab geranylgeranyltransferase, beta subunit                                                          | 6.29                                                          | Above 2x median |
| 208786_s_at     | microtubule-associated protein 1 light chain 3 beta                                                  | 6.20                                                          | Above 2x median |
| 213812_s_at     | calcium/calmodulin-dependent protein kinase kinase 2, beta                                           | 6.19                                                          | Above 2x median |
| 201963_at       | acyl-CoA synthetase long-chain family member 1                                                       | 6.18                                                          | Above 2x median |
| 204528_s_at     | nucleosome assembly protein 1-like 1                                                                 | 6.14                                                          | Above 2x median |
| 206100_at       | carboxypeptidase M                                                                                   | 6.10                                                          | Above 2x median |
| 208789_at       | polymerase I and transcript release factor                                                           | 6.09                                                          | Above 2x median |
| 200744_s_at     | guanine nucleotide binding protein (G protein), beta polypeptide 1                                   | 6.09                                                          | Above 2x median |
| 209190_s_at     | diaphanous homolog 1 (Drosophila)                                                                    | 6.07                                                          | Above 2x median |
| 222108_at       | adhesion molecule with Ig-like domain 2                                                              | 6.06                                                          | Above 2x median |
| 219032_x_at     | opsin 3                                                                                              | 6.04                                                          | Above 2x median |
| 218677_at       | S100 calcium binding protein A14                                                                     | 6.03                                                          | Above 2x median |
| 212698_s_at     | septin 10                                                                                            | 5.98                                                          | Above 2x median |
| 201849_at       | BCL2/adenovirus E1B 19kDa interacting protein 3                                                      | 5.96                                                          | Above 2x median |
| 218336_at       | prefoldin subunit 2                                                                                  | 5.94                                                          | Above 2x median |
| 212012_at       | peroxidasin homolog (Drosophila)                                                                     | 5.88                                                          | Above 2x median |
| 203065_s_at     | caveolin 1, caveolae protein, 22kDa                                                                  | 5.73                                                          | Above 2x median |
| 217755_at       | hematological and neurological expressed 1                                                           | 5.73                                                          | Above 2x median |
| 208074_s_at     | adaptor-related protein complex 2, sigma 1 subunit                                                   | 5.72                                                          | Above 2x median |
| 202345_s_at     | fatty acid binding protein 5 (psoriasis-associated)                                                  | 5.71                                                          | Above 2x median |
| 202670_at       | mitogen-activated protein kinase kinase 1                                                            | 5.71                                                          | Above 2x median |
| 202006_at       | protein tyrosine phosphatase, non-receptor type 12                                                   | 5.69                                                          | Above 2x median |
| 221676_s_at     | coronin, actin binding protein, 1C                                                                   | 5.69                                                          | Above 2x median |
| 221830_at       | RAP2A, member of RAS oncogene family                                                                 | 5.68                                                          | Above 2x median |
| 218611_at       | immediate early response 5                                                                           | 5.67                                                          | Above 2x median |
| 201976_s_at     | myosin X                                                                                             | 5.65                                                          | Above 2x median |
| 201013_s_at     | phosphoribosylaminoimidazole carboxylase, phosphoribosylaminoimidazole succinocarboxamide synthetase | 5.65                                                          | Above 2x median |
| 207121_s_at     | mitogen-activated protein kinase 6                                                                   | 5.63                                                          | Above 2x median |
| 209210_s_at     | fermitin family member 2                                                                             | 5.62                                                          | Above 2x median |
| 35820_at        | GM2 ganglioside activator                                                                            | 5.62                                                          | Above 2x median |

**Supplemental Gene List I. Airway Basal Cell Signature Genes Analyzed (cont. page 6)**

| <b>Probe ID</b> | <b>Gene name</b>                                                                                     | <b>Median of normalized expression levels in lung adenoCa</b> |                 |
|-----------------|------------------------------------------------------------------------------------------------------|---------------------------------------------------------------|-----------------|
| 208961_s_at     | Kruppel-like factor 6                                                                                | 5.55                                                          | Above 2x median |
| 212242_at       | tubulin, alpha 4a                                                                                    | 5.50                                                          | Above 2x median |
| 201761_at       | methylenetetrahydrofolate dehydrogenase (NADP+ dependent) 2, methenyltetrahydrofolate cyclohydrolase | 5.50                                                          | Above 2x median |
| 217738_at       | Nicotinamide phosphoribosyltransferase                                                               | 5.48                                                          | Above 2x median |
| 201324_at       | epithelial membrane protein 1                                                                        | 5.47                                                          | Above 2x median |
| 209270_at       | laminin, beta 3                                                                                      | 5.42                                                          | Above 2x median |
| 212640_at       | protein tyrosine phosphatase-like (proline instead of catalytic arginine), member b                  | 5.40                                                          | Above 2x median |
| 212024_x_at     | flightless I homolog (Drosophila)                                                                    | 5.40                                                          | Above 2x median |
| 203786_s_at     | tumor protein D52-like 1                                                                             | 5.37                                                          | Above 2x median |
| 215780_s_at     | SET translocation (myeloid leukemia-associated) pseudogene / SET nuclear oncogene                    | 5.32                                                          | Above 2x median |
| 218728_s_at     | cornichon homolog 4 (Drosophila)                                                                     | 5.31                                                          | Above 2x median |
| 201579_at       | FAT tumor suppressor homolog 1 (Drosophila)                                                          | 5.28                                                          | Above 2x median |
| 209080_x_at     | glutaredoxin 3                                                                                       | 5.25                                                          | Above 2x median |
| 203535_at       | S100 calcium binding protein A9                                                                      | 5.24                                                          | Above 2x median |
| 221577_x_at     | growth differentiation factor 15                                                                     | 5.24                                                          | Above 2x median |
| 202201_at       | biliverdin reductase B (flavin reductase (NADPH))                                                    | 5.24                                                          | Above 2x median |
| 209146_at       | sterol-C4-methyl oxidase-like                                                                        | 5.23                                                          | Above 2x median |
| 210105_s_at     | FYN oncogene related to SRC, FGR, YES                                                                | 5.14                                                          | Above 2x median |
| 200889_s_at     | signal sequence receptor, alpha                                                                      | 5.13                                                          | Above 2x median |
| 212250_at       | metadherin                                                                                           | 5.12                                                          | Above 2x median |
| 200733_s_at     | protein tyrosine phosphatase type IVA, member 1                                                      | 5.09                                                          | Above 2x median |
| 221827_at       | RanBP-type and C3HC4-type zinc finger containing 1                                                   | 5.09                                                          | Above 2x median |
| 209803_s_at     | pleckstrin homology-like domain, family A, member 2                                                  | 5.09                                                          | Above 2x median |
| 37408_at        | mannose receptor, C type 2                                                                           | 5.08                                                          | Above 2x median |
| 202949_s_at     | four and a half LIM domains 2                                                                        | 5.02                                                          | Above 2x median |
| 212566_at       | microtubule-associated protein 4                                                                     | 5.02                                                          | Above 2x median |
| 203323_at       | caveolin 2                                                                                           | 4.97                                                          | Above 2x median |
| 212680_x_at     | protein phosphatase 1, regulatory (inhibitor) subunit 14B                                            | 4.96                                                          | Above 2x median |
| 204135_at       | filamin A interacting protein 1-like                                                                 | 4.93                                                          | Above 2x median |
| 206074_s_at     | high mobility group AT-hook 1                                                                        | 4.93                                                          | Above 2x median |
| 205263_at       | B-cell CLL/lymphoma 10                                                                               | 4.88                                                          | Above 2x median |
| 221059_s_at     | coactosin-like 1 (Dictyostelium)                                                                     | 4.86                                                          | Above 2x median |
| 218309_at       | calcium/calmodulin-dependent protein kinase II inhibitor 1                                           | 4.80                                                          | Above 2x median |
| 201853_s_at     | cell division cycle 25 homolog B (S. pombe)                                                          | 4.79                                                          | Above 2x median |
| 218237_s_at     | solute carrier family 38, member 1                                                                   | 4.78                                                          | Above 2x median |

**Supplemental Gene List I. Airway Basal Cell Signature Genes Analyzed (cont. page 7)**

| <b>Probe ID</b> | <b>Gene name</b>                                                                                                     | <b>Median of normalized expression levels in lung adenoCa</b> |                 |
|-----------------|----------------------------------------------------------------------------------------------------------------------|---------------------------------------------------------------|-----------------|
| 217776_at       | retinol dehydrogenase 11 (all-trans/9-cis/11-cis)                                                                    | 4.77                                                          | Above 2x median |
| 201110_s_at     | thrombospondin 1                                                                                                     | 4.71                                                          | Above 2x median |
| 212846_at       | ribosomal RNA processing 1 homolog B (S. cerevisiae)                                                                 | 4.70                                                          | Above 2x median |
| 212765_at       | calmodulin regulated spectrin-associated protein 1-like 1                                                            | 4.69                                                          | Above 2x median |
| 220199_s_at     | axin interactor, dorsalization associated                                                                            | 4.69                                                          | Above 2x median |
| 201263_at       | threonyl-tRNA synthetase                                                                                             | 4.68                                                          | Above 2x median |
| 203910_at       | Rho GTPase activating protein 29                                                                                     | 4.68                                                          | Above 2x median |
| 203287_at       | ladinin 1                                                                                                            | 4.66                                                          | Above 2x median |
| 217165_x_at     | metallothionein 1F                                                                                                   | 4.63                                                          | Above 2x median |
| 212470_at       | sperm associated antigen 9                                                                                           | 4.61                                                          | Above 2x median |
| 202693_s_at     | serine/threonine kinase 17a                                                                                          | 4.59                                                          | Above 2x median |
| 202620_s_at     | procollagen-lysine, 2-oxoglutarate 5-dioxygenase 2                                                                   | 4.58                                                          | Above 2x median |
| 209191_at       | tubulin, beta 6                                                                                                      | 4.54                                                          | Above 2x median |
| 216348_at       | ribosomal protein S17                                                                                                | 4.47                                                          | Above 2x median |
| 200755_s_at     | calumenin                                                                                                            | 4.42                                                          | Above 2x median |
| 201645_at       | tenascin C                                                                                                           | 4.41                                                          | Above 2x median |
| 200808_s_at     | zyxin                                                                                                                | 4.38                                                          | Above 2x median |
| 201573_s_at     | eukaryotic translation termination factor 1                                                                          | 4.37                                                          | Above 2x median |
| 210058_at       | mitogen-activated protein kinase 13                                                                                  | 4.33                                                          | Above 2x median |
| 202771_at       | family with sequence similarity 38, member A                                                                         | 4.33                                                          | Above 2x median |
| 202352_s_at     | proteasome (prosome, macropain) 26S subunit, non-ATPase, 12                                                          | 4.32                                                          | Above 2x median |
| 212160_at       | exportin, tRNA (nuclear export receptor for tRNAs)                                                                   | 4.31                                                          | Above 2x median |
| 212245_at       | multiple coagulation factor deficiency 2                                                                             | 4.31                                                          | Above 2x median |
| 212190_at       | serpin peptidase inhibitor, clade E (nexin, plasminogen activator inhibitor type 1), member 2                        | 4.30                                                          | Above 2x median |
| 201595_s_at     | zinc finger CCCH-type containing 15                                                                                  | 4.25                                                          | Above 2x median |
| 212018_s_at     | ribosomal L1 domain containing 1                                                                                     | 4.25                                                          | Above 2x median |
| 212298_at       | neuropilin 1                                                                                                         | 4.25                                                          | Above 2x median |
| 202933_s_at     | v-yes-1 Yamaguchi sarcoma viral oncogene homolog 1                                                                   | 4.24                                                          | Above 2x median |
| 210396_s_at     | bolA homolog 2 (E. coli) / PI-3-kinase-related kinase SMG-1 pseudogene / PI-3-kinase-related kinase SMG-1 pseudogene | 4.22                                                          | Above 2x median |
| 221510_s_at     | glutaminase                                                                                                          | 4.20                                                          | Above 2x median |
| 212739_s_at     | non-metastatic cells 4, protein expressed in                                                                         | 4.19                                                          | Above 2x median |
| 202284_s_at     | cyclin-dependent kinase inhibitor 1A (p21, Cip1)                                                                     | 4.19                                                          | Above 2x median |
| 213532_at       | ADAM metallopeptidase domain 17                                                                                      | 4.18                                                          | Above 2x median |
| 52164_at        | chromosome 11 open reading frame 24                                                                                  | 4.16                                                          | Above 2x median |

**Supplemental Gene List I. Airway Basal Cell Signature Genes Analyzed (cont. page 8)**

| <b>Probe ID</b> | <b>Gene name</b>                                                             | <b>Median of normalized expression levels in lung adenoCa</b> |                 |
|-----------------|------------------------------------------------------------------------------|---------------------------------------------------------------|-----------------|
| 221654_s_at     | ubiquitin specific peptidase 3                                               | 4.16                                                          | Above 2x median |
| 202437_s_at     | cytochrome P450, family 1, subfamily B, polypeptide 1                        | 4.14                                                          | Above 2x median |
| 201751_at       | Josephin domain containing 1                                                 | 4.14                                                          | Above 2x median |
| 221580_s_at     | TATA box binding protein (TBP)-associated factor, RNA polymerase I, D, 41kDa | 4.13                                                          | Above 2x median |
| 209295_at       | tumor necrosis factor receptor superfamily, member 10b                       | 4.12                                                          | Above 2x median |
| 209135_at       | aspartate beta-hydroxylase                                                   | 4.12                                                          | Above 2x median |
| 209836_x_at     | bolA homolog 2 (E. coli) / bolA homolog 2B (E. coli)                         | 4.11                                                          | Above 2x median |
| 209409_at       | growth factor receptor-bound protein 10                                      | 4.07                                                          | Above 2x median |
| 200615_s_at     | adaptor-related protein complex 2, beta 1 subunit                            | 4.07                                                          | Above 2x median |
| 203414_at       | monocyte to macrophage differentiation-associated                            | 4.06                                                          | Above 2x median |
| 205479_s_at     | plasminogen activator, urokinase                                             | 4.04                                                          | Above 2x median |
| 214435_x_at     | v-ral simian leukemia viral oncogene homolog A (ras related)                 | 4.03                                                          | Above 2x median |
| 214214_s_at     | complement component 1, q subcomponent binding protein                       | 4.02                                                          | Above 2x median |
| 209100_at       | interferon-related developmental regulator 2                                 | 3.96                                                          | Above 2x median |
| 201980_s_at     | Ras suppressor protein 1                                                     | 3.95                                                          | Above 2x median |
| 201474_s_at     | integrin, alpha 3 (antigen CD49C, alpha 3 subunit of VLA-3 receptor)         | 3.84                                                          | Above 2x median |
| 203574_at       | nuclear factor, interleukin 3 regulated                                      | 3.80                                                          | Above 2x median |
| 205324_s_at     | FtsJ homolog 1 (E. coli)                                                     | 3.78                                                          | Above 2x median |
| 212104_s_at     | RNA binding protein, fox-1 homolog (C. elegans) 2                            | 3.78                                                          | Above 2x median |
| 205105_at       | mannosidase, alpha, class 2A, member 1                                       | 3.77                                                          | Above 2x median |
| 217988_at       | cyclin B1 interacting protein 1                                              | 3.76                                                          | Above 2x median |
| 209344_at       | tropomyosin 4                                                                | 3.73                                                          | Above 2x median |
| 212072_s_at     | casein kinase 2, alpha 1 polypeptide                                         | 3.71                                                          | Above 2x median |
| 202347_s_at     | ubiquitin-conjugating enzyme E2K (UBC1 homolog, yeast)                       | 3.69                                                          | Above 2x median |
| 211043_s_at     | clathrin, light chain B                                                      | 3.68                                                          | Above 2x median |
| 202686_s_at     | AXL receptor tyrosine kinase                                                 | 3.67                                                          | Above 2x median |
| 202679_at       | Niemann-Pick disease, type C1                                                | 3.67                                                          | Above 2x median |
| 212887_at       | Sec23 homolog A (S. cerevisiae)                                              | 3.65                                                          | Above 2x median |
| 205807_s_at     | tuftelin 1                                                                   | 3.65                                                          | Above 2x median |
| 217913_at       | vacuolar protein sorting 4 homolog A (S. cerevisiae)                         | 3.62                                                          | Above 2x median |
| 202148_s_at     | pyrroline-5-carboxylate reductase 1                                          | 3.62                                                          | Above 2x median |
| 213671_s_at     | methionyl-tRNA synthetase                                                    | 3.60                                                          | Above 2x median |
| 212658_at       | lipoma HMGIC fusion partner-like 2                                           | 3.59                                                          | Above 2x median |



**Supplemental Gene List I. Airway Basal Cell Signature Genes Analyzed (cont. page 9)**

| <b>Probe ID</b> | <b>Gene name</b>                                                                           | <b>Median of normalized expression levels in lung adenoCa</b> |                 |
|-----------------|--------------------------------------------------------------------------------------------|---------------------------------------------------------------|-----------------|
| 202369_s_at     | translocation associated membrane protein 2                                                | 3.58                                                          | Above 2x median |
| 218421_at       | ceramide kinase                                                                            | 3.55                                                          | Above 2x median |
| 202431_s_at     | v-myc myelocytomatosis viral oncogene homolog (avian)                                      | 3.51                                                          | Above 2x median |
| 210740_s_at     | inositol 1,3,4-triphosphate 5/6 kinase                                                     | 3.47                                                          | Above 2x median |
| 202575_at       | cellular retinoic acid binding protein 2                                                   | 3.47                                                          | Above 2x median |
| 37152_at        | peroxisome proliferator-activated receptor delta                                           | 3.46                                                          | Above 2x median |
| 218982_s_at     | mitochondrial ribosomal protein S17 / zinc finger protein 713                              | 3.46                                                          | Above 2x median |
| 216268_s_at     | jagged 1                                                                                   | 3.46                                                          | Above 2x median |
| 202224_at       | v-crk sarcoma virus CT10 oncogene homolog (avian)                                          | 3.45                                                          | Above 2x median |
| 217943_s_at     | MAP7 domain containing 1                                                                   | 3.44                                                          | Above 2x median |
| 212355_at       | KH and NYN domain containing                                                               | 3.44                                                          | Above 2x median |
| 218131_s_at     | GATA zinc finger domain containing 2A                                                      | 3.42                                                          | Above 2x median |
| 203725_at       | growth arrest and DNA-damage-inducible, alpha                                              | 3.41                                                          | Above 2x median |
| 208925_at       | claudin domain containing 1                                                                | 3.35                                                          | Above 2x median |
| 201695_s_at     | purine nucleoside phosphorylase                                                            | 3.33                                                          | Above 2x median |
| 208824_x_at     | cyclin-dependent kinase 16                                                                 | 3.33                                                          | Above 2x median |
| 218018_at       | pyridoxal (pyridoxine, vitamin B6) kinase                                                  | 3.33                                                          | Above 2x median |
| 209365_s_at     | extracellular matrix protein 1                                                             | 3.29                                                          | Above 2x median |
| 201516_at       | spermidine synthase                                                                        | 3.27                                                          | Above 2x median |
| 221489_s_at     | sprouty homolog 4 (Drosophila)                                                             | 3.18                                                          | Above 2x median |
| 209264_s_at     | tetraspanin 4                                                                              | 3.18                                                          | Above 2x median |
| 204319_s_at     | regulator of G-protein signaling 10                                                        | 3.18                                                          | Above 2x median |
| 209457_at       | dual specificity phosphatase 5                                                             | 3.18                                                          | Above 2x median |
| 202696_at       | oxidative-stress responsive 1                                                              | 3.18                                                          | Above 2x median |
| 204331_s_at     | mitochondrial ribosomal protein S12                                                        | 3.17                                                          | Above 2x median |
| 209651_at       | transforming growth factor beta 1 induced transcript 1                                     | 3.16                                                          | Above 2x median |
| 204034_at       | ethylmalonic encephalopathy 1                                                              | 3.16                                                          | Above 2x median |
| 202855_s_at     | solute carrier family 16, member 3 (monocarboxylic acid transporter 4)                     | 3.16                                                          | Above 2x median |
| 221931_s_at     | SEH1-like (S. cerevisiae)                                                                  | 3.16                                                          | Above 2x median |
| 201481_s_at     | phosphorylase, glycogen; brain                                                             | 3.15                                                          | Above 2x median |
| 203740_at       | M-phase phosphoprotein 6                                                                   | 3.13                                                          | Above 2x median |
| 218732_at       | peptidyl-tRNA hydrolase 2                                                                  | 3.11                                                          | Above 2x median |
| 212110_at       | solute carrier family 39 (zinc transporter), member 14                                     | 3.11                                                          | Above 2x median |
| 200924_s_at     | solute carrier family 3 (activators of dibasic and neutral amino acid transport), member 2 | 3.11                                                          | Above 2x median |
| 217492_s_at     | phosphatase and tensin homolog / phosphatase and tensin                                    | 3.11                                                          | Above 2x median |

**Supplemental Gene List I. Airway Basal Cell Signature Genes Analyzed (cont. page 10)**

| <b>Probe ID</b> | <b>Gene name</b>                                                                      | <b>Median of normalized expression levels in lung adenoCa</b> |                 |
|-----------------|---------------------------------------------------------------------------------------|---------------------------------------------------------------|-----------------|
|                 | homolog pseudogene 1                                                                  |                                                               |                 |
| 204334_at       | Kruppel-like factor 7 (ubiquitous)                                                    | 3.08                                                          | Above 2x median |
| 210916_s_at     | CD44 molecule (Indian blood group)                                                    | 3.07                                                          | Above 2x median |
| 209260_at       | stratifin                                                                             | 3.06                                                          | Above 2x median |
| 218656_s_at     | lipoma HMGIC fusion partner                                                           | 3.04                                                          | Above 2x median |
| 218092_s_at     | ArfGAP with FG repeats 1                                                              | 3.04                                                          | Above 2x median |
| 202894_at       | EPH receptor B4                                                                       | 3.04                                                          | Above 2x median |
| 203085_s_at     | transforming growth factor, beta 1                                                    | 3.03                                                          | Above 2x median |
| 214696_at       | chromosome 17 open reading frame 91                                                   | 3.02                                                          | Above 2x median |
| 218826_at       | solute carrier family 35, member F2                                                   | 3.02                                                          | Above 2x median |
| 209187_at       | down-regulator of transcription 1, TBP-binding (negative cofactor 2)                  | 3.01                                                          | Above 2x median |
| 206688_s_at     | cleavage and polyadenylation specific factor 4, 30kDa                                 | 2.98                                                          | Above 2x median |
| 219648_at       | melanoregulin                                                                         | 2.97                                                          | Above 2x median |
| 205361_s_at     | prefoldin subunit 4                                                                   | 2.96                                                          | Above 2x median |
| 219121_s_at     | epithelial splicing regulatory protein 1                                              | 2.94                                                          | Above 2x median |
| 203279_at       | ER degradation enhancer, mannosidase alpha-like 1                                     | 2.93                                                          | Above 2x median |
| 201195_s_at     | solute carrier family 7 (cationic amino acid transporter, y+ system), member 5        | 2.93                                                          | Above 2x median |
| 203256_at       | cadherin 3, type 1, P-cadherin (placental)                                            | 2.91                                                          | Above 2x median |
| 203550_s_at     | family with sequence similarity 189, member B                                         | 2.89                                                          | Above 2x median |
| 221667_s_at     | heat shock 22kDa protein 8                                                            | 2.89                                                          | Above 2x median |
| 219933_at       | glutaredoxin 2                                                                        | 2.88                                                          | Above 2x median |
| 221753_at       | slingshot homolog 1 (Drosophila)                                                      | 2.88                                                          | Above 2x median |
| 203002_at       | angiomin like 2                                                                       | 2.86                                                          | Above 2x median |
| 213524_s_at     | G0/G1switch 2                                                                         | 2.85                                                          | Above 2x median |
| 203821_at       | heparin-binding EGF-like growth factor                                                | 2.81                                                          | Above 2x median |
| 207826_s_at     | inhibitor of DNA binding 3, dominant negative helix-loop-helix protein                | 2.80                                                          | Above 2x median |
| 202998_s_at     | lysyl oxidase-like 2                                                                  | 2.78                                                          | Above 2x median |
| 221050_s_at     | GTP binding protein 2                                                                 | 2.78                                                          | Above 2x median |
| 203405_at       | proteasome (prosome, macropain) assembly chaperone 1                                  | 2.77                                                          | Above 2x median |
| 218145_at       | tribbles homolog 3 (Drosophila)                                                       | 2.75                                                          | Above 2x median |
| 218193_s_at     | golgi transport 1B                                                                    | 2.73                                                          | Above 2x median |
| 204748_at       | prostaglandin-endoperoxide synthase 2 (prostaglandin G/H synthase and cyclooxygenase) | 2.73                                                          | Above 2x median |
| 203297_s_at     | jumonji, AT rich interactive domain 2                                                 | 2.73                                                          | Above 2x median |
| 218046_s_at     | mitochondrial ribosomal protein S16                                                   | 2.71                                                          | Above 2x median |

**Supplemental Gene List I. Airway Basal Cell Signature Genes Analyzed (cont. page 11)**

| <b>Probe ID</b> | <b>Gene name</b>                                                                              | <b>Median of normalized expression levels in lung adenoCa</b> |                 |
|-----------------|-----------------------------------------------------------------------------------------------|---------------------------------------------------------------|-----------------|
| 212612_at       | REST corepressor 1                                                                            | 2.71                                                          | Above 2x median |
| 209369_at       | annexin A3                                                                                    | 2.70                                                          | Above 2x median |
| 202754_at       | R3H domain containing 1                                                                       | 2.69                                                          | Above 2x median |
| 204616_at       | ubiquitin carboxyl-terminal esterase L3 (ubiquitin thiolesterase)                             | 2.69                                                          | Above 2x median |
| 204214_s_at     | RAB32, member RAS oncogene family                                                             | 2.68                                                          | Above 2x median |
| 217996_at       | pleckstrin homology-like domain, family A, member 1                                           | 2.68                                                          | Above 2x median |
| 202934_at       | hexokinase 2                                                                                  | 2.68                                                          | Above 2x median |
| 201016_at       | eukaryotic translation initiation factor 1A, X-linked                                         | 2.67                                                          | Above 2x median |
| 207172_s_at     | cadherin 11, type 2, OB-cadherin (osteoblast)                                                 | 2.67                                                          | Above 2x median |
| 218401_s_at     | zinc finger protein 281                                                                       | 2.66                                                          | Above 2x median |
| 212556_at       | scribbled homolog (Drosophila)                                                                | 2.66                                                          | Above 2x median |
| 209096_at       | ubiquitin-conjugating enzyme E2 variant 2                                                     | 2.65                                                          | Above 2x median |
| 210970_s_at     | inhibitor of Bruton agammaglobulinemia tyrosine kinase                                        | 2.63                                                          | Above 2x median |
| 213457_at       | malignant fibrous histiocytoma amplified sequence 1                                           | 2.60                                                          | Above 2x median |
| 210517_s_at     | A kinase (PRKA) anchor protein 12                                                             | 2.59                                                          | Above 2x median |
| 204971_at       | cystatin A (stefin A)                                                                         | 2.59                                                          | Above 2x median |
| 218669_at       | RAP2C, member of RAS oncogene family                                                          | 2.57                                                          | Above 2x median |
| 212845_at       | sterile alpha motif domain containing 4A                                                      | 2.57                                                          | Above 2x median |
| 202806_at       | drebrin 1                                                                                     | 2.55                                                          | Above 2x median |
| 202734_at       | thyroid hormone receptor interactor 10                                                        | 2.54                                                          | Above 2x median |
| 203373_at       | suppressor of cytokine signaling 2                                                            | 2.53                                                          | Above 2x median |
| 213734_at       | WD repeat and SOCS box-containing 2                                                           | 2.53                                                          | Above 2x median |
| 212647_at       | related RAS viral (r-ras) oncogene homolog                                                    | 2.52                                                          | Above 2x median |
| 205047_s_at     | asparagine synthetase (glutamine-hydrolyzing)                                                 | 2.52                                                          | Above 2x median |
| 218051_s_at     | 5'-nucleotidase domain containing 2                                                           | 2.50                                                          | Above 2x median |
| 202557_at       | heat shock protein 70kDa family, member 13                                                    | 2.48                                                          | Above 2x median |
| 219024_at       | pleckstrin homology domain containing, family A (phosphoinositide binding specific) member 1  | 2.47                                                          | Above 2x median |
| 202628_s_at     | serpin peptidase inhibitor, clade E (nexin, plasminogen activator inhibitor type 1), member 1 | 2.47                                                          | Above 2x median |
| 210869_s_at     | melanoma cell adhesion molecule                                                               | 2.46                                                          | Above 2x median |
| 212590_at       | related RAS viral (r-ras) oncogene homolog 2                                                  | 2.46                                                          | Above 2x median |
| 208962_s_at     | fatty acid desaturase 1                                                                       | 2.45                                                          | Above 2x median |
| 212607_at       | v-akt murine thymoma viral oncogene homolog 3 (protein kinase B, gamma)                       | 2.45                                                          | Above 2x median |
| 205729_at       | oncostatin M receptor                                                                         | 2.43                                                          | Above 2x median |
| 37462_i_at      | splicing factor 3a, subunit 2, 66kDa                                                          | 2.43                                                          | Above 2x median |

**Supplemental Gene List I. Airway Basal Cell Signature Genes Analyzed (cont. page 12)**

| <b>Probe ID</b> | <b>Gene name</b>                                                                                     | <b>Median of normalized expression levels in lung adenoCa</b> |                 |
|-----------------|------------------------------------------------------------------------------------------------------|---------------------------------------------------------------|-----------------|
| 201984_s_at     | epidermal growth factor receptor                                                                     | 2.42                                                          | Above 2x median |
| 218995_s_at     | endothelin 1                                                                                         | 2.41                                                          | Above 2x median |
| 213554_s_at     | CDV3 homolog (mouse)                                                                                 | 2.40                                                          | Above 2x median |
| 202779_s_at     | ubiquitin-conjugating enzyme E2S                                                                     | 2.40                                                          | Above 2x median |
| 217875_s_at     | prostate transmembrane protein, androgen induced 1                                                   | 2.39                                                          | Above 2x median |
| 209444_at       | RAP1, GTP-GDP dissociation stimulator 1                                                              | 2.38                                                          | Above 2x median |
| 212992_at       | AHNAK nucleoprotein 2                                                                                | 2.37                                                          | Above 2x median |
| 203585_at       | zinc finger protein 185 (LIM domain)                                                                 | 2.37                                                          | Above 2x median |
| 203258_at       | DR1-associated protein 1 (negative cofactor 2 alpha)                                                 | 2.35                                                          | Above 2x median |
| 222162_s_at     | ADAM metallopeptidase with thrombospondin type 1 motif, 1                                            | 2.35                                                          | Above 2x median |
| 214431_at       | guanine monphosphate synthetase                                                                      | 2.34                                                          | Above 2x median |
| 204194_at       | BTB and CNC homology 1, basic leucine zipper transcription factor 1                                  | 2.34                                                          | Above 2x median |
| 216088_s_at     | proteasome (prosome, macropain) subunit, alpha type, 7                                               | 2.34                                                          | Above 2x median |
| 201505_at       | laminin, beta 1                                                                                      | 2.32                                                          | Above 2x median |
| 218238_at       | GTP binding protein 4                                                                                | 2.32                                                          | Above 2x median |
| 201791_s_at     | 7-dehydrocholesterol reductase                                                                       | 2.31                                                          | Above 2x median |
| 218849_s_at     | protein phosphatase 1, regulatory (inhibitor) subunit 13 like                                        | 2.31                                                          | Above 2x median |
| 218499_at       | serine/threonine protein kinase MST4                                                                 | 2.26                                                          | Above 2x median |
| 203234_at       | uridine phosphorylase 1                                                                              | 2.25                                                          | Above 2x median |
| 221437_s_at     | mitochondrial ribosomal protein S15                                                                  | 2.25                                                          | Above 2x median |
| 204977_at       | DEAD (Asp-Glu-Ala-Asp) box polypeptide 10                                                            | 2.24                                                          | Above 2x median |
| 212527_at       | PPPDE peptidase domain containing 2                                                                  | 2.23                                                          | Above 2x median |
| 204976_s_at     | Alport syndrome, mental retardation, midface hypoplasia and elliptocytosis chromosomal region gene 1 | 2.23                                                          | Above 2x median |
| 202912_at       | adrenomedullin                                                                                       | 2.22                                                          | Above 2x median |
| 201389_at       | integrin, alpha 5 (fibronectin receptor, alpha polypeptide)                                          | 2.21                                                          | Above 2x median |
| 201692_at       | sigma non-opioid intracellular receptor 1                                                            | 2.20                                                          | Above 2x median |
| 218526_s_at     | RAN guanine nucleotide release factor                                                                | 2.19                                                          | Above 2x median |
| 202543_s_at     | glia maturation factor, beta                                                                         | 2.19                                                          | Above 2x median |
| 217784_at       | YKT6 v-SNARE homolog (S. cerevisiae)                                                                 | 2.17                                                          | Above 2x median |
| 205463_s_at     | platelet-derived growth factor alpha polypeptide                                                     | 2.17                                                          | Above 2x median |
| 209324_s_at     | regulator of G-protein signaling 16                                                                  | 2.15                                                          | Above 2x median |
| 219155_at       | phosphatidylinositol transfer protein, cytoplasmic 1                                                 | 2.15                                                          | Above 2x median |
| 213757_at       | Eukaryotic translation initiation factor 5A                                                          | 2.14                                                          | Above 2x median |
| 202158_s_at     | CUGBP, Elav-like family member 2                                                                     | 2.13                                                          | Above 2x median |

**Supplemental Gene List I. Airway Basal Cell Signature Genes Analyzed (cont. page 13)**

| <b>Probe ID</b> | <b>Gene name</b>                                                  | <b>Median of normalized expression levels in lung adenoCa</b> |                 |
|-----------------|-------------------------------------------------------------------|---------------------------------------------------------------|-----------------|
| 209383_at       | DNA-damage-inducible transcript 3                                 | 2.11                                                          | Above 2x median |
| 201380_at       | cartilage associated protein                                      | 2.11                                                          | Above 2x median |
| 209278_s_at     | tissue factor pathway inhibitor 2                                 | 2.11                                                          | Above 2x median |
| 217437_s_at     | transforming, acidic coiled-coil containing protein 1             | 2.10                                                          | Above 2x median |
| 208002_s_at     | acyl-CoA thioesterase 7                                           | 2.09                                                          | Above 2x median |
| 202847_at       | phosphoenolpyruvate carboxykinase 2 (mitochondrial)               | 2.08                                                          | Above 2x median |
| 204285_s_at     | phorbol-12-myristate-13-acetate-induced protein 1                 | 2.07                                                          | Above 2x median |
| 203672_x_at     | thiopurine S-methyltransferase                                    | 2.06                                                          | Above 2x median |
| 218777_at       | receptor accessory protein 4                                      | 2.05                                                          | Above 2x median |
| 218647_s_at     | yrdC domain containing (E. coli)                                  | 2.05                                                          | Above 2x median |
| 207030_s_at     | cysteine and glycine-rich protein 2                               | 2.04                                                          | Above 2x median |
| 204647_at       | homer homolog 3 (Drosophila)                                      | 2.02                                                          | Above 2x median |
| 204268_at       | S100 calcium binding protein A2                                   | 2.02                                                          | Above 2x median |
| 221539_at       | eukaryotic translation initiation factor 4E binding protein 1     | 2.02                                                          | Above 2x median |
| 218796_at       | fermitin family member 1                                          | 2.01                                                          | Above 2x median |
| 203741_s_at     | adenylate cyclase 7                                               | 1.99                                                          |                 |
| 204255_s_at     | vitamin D (1,25- dihydroxyvitamin D3) receptor                    | 1.99                                                          |                 |
| 218451_at       | CUB domain containing protein 1                                   | 1.97                                                          |                 |
| 203939_at       | 5'-nucleotidase, ecto (CD73)                                      | 1.94                                                          |                 |
| 218247_s_at     | mex-3 homolog C (C. elegans)                                      | 1.94                                                          |                 |
| 202146_at       | interferon-related developmental regulator 1                      | 1.94                                                          |                 |
| 202647_s_at     | neuroblastoma RAS viral (v-ras) oncogene homolog                  | 1.94                                                          |                 |
| 218498_s_at     | ERO1-like (S. cerevisiae)                                         | 1.92                                                          |                 |
| 202314_at       | cytochrome P450, family 51, subfamily A, polypeptide 1            | 1.92                                                          |                 |
| 217266_at       | ribosomal protein L15                                             | 1.90                                                          |                 |
| 206571_s_at     | mitogen-activated protein kinase kinase kinase kinase 4           | 1.89                                                          |                 |
| 205239_at       | amphiregulin                                                      | 1.88                                                          |                 |
| 201787_at       | fibulin 1                                                         | 1.87                                                          |                 |
| 202131_s_at     | RIO kinase 3 (yeast)                                              | 1.86                                                          |                 |
| 203693_s_at     | E2F transcription factor 3                                        | 1.85                                                          |                 |
| 201387_s_at     | ubiquitin carboxyl-terminal esterase L1 (ubiquitin thiolesterase) | 1.84                                                          |                 |
| 202267_at       | laminin, gamma 2                                                  | 1.84                                                          |                 |
| 216620_s_at     | Rho guanine nucleotide exchange factor (GEF) 10                   | 1.83                                                          |                 |
| 213062_at       | N-terminal asparagine amidase                                     | 1.83                                                          |                 |
| 201656_at       | integrin, alpha 6                                                 | 1.83                                                          |                 |
| 219099_at       | chromosome 12 open reading frame 5                                | 1.81                                                          |                 |
| 205016_at       | transforming growth factor, alpha                                 | 1.81                                                          |                 |

**Supplemental Gene List I. Airway Basal Cell Signature Genes Analyzed (cont. page 14)**

| <b>Probe ID</b> | <b>Gene name</b>                                                                                                  | <b>Median of normalized expression levels in lung adenoCa</b> |
|-----------------|-------------------------------------------------------------------------------------------------------------------|---------------------------------------------------------------|
| 203695_s_at     | deafness, autosomal dominant 5                                                                                    | 1.81                                                          |
| 218888_s_at     | neuropilin (NRP) and tolloid (TLL)-like 2                                                                         | 1.79                                                          |
| 207357_s_at     | UDP-N-acetyl-alpha-D-galactosamine:polypeptide N-acetylgalactosaminyltransferase 10 (GalNAc-T10)                  | 1.79                                                          |
| 210026_s_at     | caspase recruitment domain family, member 10                                                                      | 1.78                                                          |
| 204693_at       | CDC42 effector protein (Rho GTPase binding) 1                                                                     | 1.77                                                          |
| 219856_at       | chromosome 1 open reading frame 116                                                                               | 1.76                                                          |
| 31845_at        | E74-like factor 4 (ets domain transcription factor)                                                               | 1.76                                                          |
| 209308_s_at     | BCL2/adenovirus E1B 19kDa interacting protein 2                                                                   | 1.75                                                          |
| 204435_at       | nucleoporin like 1                                                                                                | 1.74                                                          |
| 202613_at       | CTP synthase                                                                                                      | 1.71                                                          |
| 200690_at       | heat shock 70kDa protein 9 (mortalin)                                                                             | 1.71                                                          |
| 203074_at       | annexin A8 / annexin A8-like 1 / annexin A8-like 2                                                                | 1.71                                                          |
| 216383_at       | ribosomal protein L18a /// ribosomal protein L18a pseudogene 3                                                    | 1.70                                                          |
| 219256_s_at     | SH3 domain and tetratricopeptide repeats 1                                                                        | 1.69                                                          |
| 209283_at       | crystallin, alpha B                                                                                               | 1.69                                                          |
| 202728_s_at     | latent transforming growth factor beta binding protein 1                                                          | 1.69                                                          |
| 218038_at       | ATP5S-like                                                                                                        | 1.69                                                          |
| 213094_at       | G protein-coupled receptor 126                                                                                    | 1.68                                                          |
| 206884_s_at     | sciellin                                                                                                          | 1.67                                                          |
| 202196_s_at     | dickkopf homolog 3 (Xenopus laevis)                                                                               | 1.67                                                          |
| 204475_at       | matrix metalloproteinase 1 (interstitial collagenase)                                                             | 1.67                                                          |
| 203726_s_at     | laminin, alpha 3                                                                                                  | 1.65                                                          |
| 209433_s_at     | phosphoribosyl pyrophosphate amidotransferase                                                                     | 1.65                                                          |
| 206714_at       | arachidonate 15-lipoxygenase, type B                                                                              | 1.64                                                          |
| 215084_s_at     | leucine rich repeat containing 42                                                                                 | 1.63                                                          |
| 219045_at       | ras homolog gene family, member F (in filopodia)                                                                  | 1.63                                                          |
| 218828_at       | phospholipid scramblase 3                                                                                         | 1.62                                                          |
| 213010_at       | protein kinase C, delta binding protein                                                                           | 1.62                                                          |
| 203592_s_at     | folliculin-like 3 (secreted glycoprotein)                                                                         | 1.61                                                          |
| 205349_at       | guanine nucleotide binding protein (G protein), alpha 15 (Gq class)                                               | 1.61                                                          |
| 203562_at       | fasciculation and elongation protein zeta 1 (zygin I)                                                             | 1.60                                                          |
| 203348_s_at     | ets variant 5                                                                                                     | 1.60                                                          |
| 203370_s_at     | PDZ and LIM domain 7 (enigma)                                                                                     | 1.60                                                          |
| 204030_s_at     | IQ motif containing J-schwannomin interacting protein 1 read-through transcript / schwannomin interacting protein | 1.59                                                          |

**Supplemental Gene List I. Airway Basal Cell Signature Genes Analyzed (cont. page 15)**

| <b>Probe ID</b> | <b>Gene name</b>                                                                                | <b>Median of normalized expression levels in lung adenoCa</b> |
|-----------------|-------------------------------------------------------------------------------------------------|---------------------------------------------------------------|
|                 | 1                                                                                               |                                                               |
| 222235_s_at     | chondroitin sulfate N-acetylgalactosaminyltransferase 2                                         | 1.58                                                          |
| 203105_s_at     | dynamamin 1-like                                                                                | 1.58                                                          |
| 219038_at       | MORC family CW-type zinc finger 4                                                               | 1.58                                                          |
| 204955_at       | sushi-repeat-containing protein, X-linked                                                       | 1.58                                                          |
| 214097_at       | ribosomal protein S21                                                                           | 1.56                                                          |
| 214075_at       | neuron derived neurotrophic factor                                                              | 1.56                                                          |
| 211071_s_at     | myeloid/lymphoid or mixed-lineage leukemia (trithorax homolog, Drosophila); translocated to, 11 | 1.55                                                          |
| 209453_at       | solute carrier family 9 (sodium/hydrogen exchanger), member 1                                   | 1.54                                                          |
| 218717_s_at     | leprecan-like 1                                                                                 | 1.54                                                          |
| 221039_s_at     | ArfGAP with SH3 domain, ankyrin repeat and PH domain 1                                          | 1.51                                                          |
| 219437_s_at     | ankyrin repeat domain 11                                                                        | 1.50                                                          |
| 218823_s_at     | potassium channel tetramerisation domain containing 9                                           | 1.47                                                          |
| 213139_at       | snail homolog 2 (Drosophila)                                                                    | 1.47                                                          |
| 212702_s_at     | bicaudal D homolog 2 (Drosophila)                                                               | 1.46                                                          |
| 203963_at       | carbonic anhydrase XII                                                                          | 1.45                                                          |
| 205289_at       | bone morphogenetic protein 2                                                                    | 1.45                                                          |
| 202701_at       | bone morphogenetic protein 1                                                                    | 1.45                                                          |
| 202422_s_at     | acyl-CoA synthetase long-chain family member 4                                                  | 1.45                                                          |
| 209890_at       | tetraspanin 5                                                                                   | 1.44                                                          |
| 205180_s_at     | ADAM metallopeptidase domain 8                                                                  | 1.43                                                          |
| 219496_at       | ankyrin repeat domain 57                                                                        | 1.43                                                          |
| 203180_at       | aldehyde dehydrogenase 1 family, member A3                                                      | 1.43                                                          |
| 214168_s_at     | tight junction protein 1 (zona occludens 1)                                                     | 1.43                                                          |
| 218156_s_at     | TSR1, 20S rRNA accumulation, homolog (S. cerevisiae)                                            | 1.43                                                          |
| 212290_at       | solute carrier family 7 (cationic amino acid transporter, y+ system), member 1                  | 1.43                                                          |
| 202735_at       | emopamil binding protein (sterol isomerase)                                                     | 1.43                                                          |
| 209894_at       | leptin receptor                                                                                 | 1.42                                                          |
| 204686_at       | insulin receptor substrate 1                                                                    | 1.42                                                          |
| 212563_at       | block of proliferation 1                                                                        | 1.42                                                          |
| 212094_at       | paternally expressed 10                                                                         | 1.40                                                          |
| 219412_at       | RAB38, member RAS oncogene family                                                               | 1.39                                                          |
| 204928_s_at     | solute carrier family 10 (sodium/bile acid cotransporter family), member 3                      | 1.39                                                          |

**Supplemental Gene List I. Airway Basal Cell Signature Genes Analyzed (cont. page 16)**

| <b>Probe ID</b> | <b>Gene name</b>                                                           | <b>Median of normalized expression levels in lung adenoCa</b> |
|-----------------|----------------------------------------------------------------------------|---------------------------------------------------------------|
| 212657_s_at     | interleukin 1 receptor antagonist                                          | 1.39                                                          |
| 205264_at       | CD3e molecule, epsilon associated protein                                  | 1.39                                                          |
| 209053_s_at     | Wolf-Hirschhorn syndrome candidate 1                                       | 1.38                                                          |
| 213696_s_at     | mediator complex subunit 8                                                 | 1.38                                                          |
| 221156_x_at     | cell cycle progression 1                                                   | 1.38                                                          |
| 204257_at       | fatty acid desaturase 3                                                    | 1.37                                                          |
| 203543_s_at     | Kruppel-like factor 9                                                      | 1.37                                                          |
| 213848_at       | dual specificity phosphatase 7                                             | 1.37                                                          |
| 219991_at       | solute carrier family 2 (facilitated glucose transporter), member 9        | 1.37                                                          |
| 202218_s_at     | fatty acid desaturase 2                                                    | 1.36                                                          |
| 217948_at       | family with sequence similarity 127, member B                              | 1.36                                                          |
| 215411_s_at     | TRAF3 interacting protein 2                                                | 1.36                                                          |
| 40284_at        | forkhead box A2                                                            | 1.36                                                          |
| 201819_at       | scavenger receptor class B, member 1                                       | 1.35                                                          |
| 203851_at       | insulin-like growth factor binding protein 6                               | 1.35                                                          |
| 213793_s_at     | homer homolog 1 (Drosophila)                                               | 1.35                                                          |
| 202787_s_at     | mitogen-activated protein kinase-activated protein kinase 3                | 1.34                                                          |
| 219483_s_at     | porcupine homolog (Drosophila)                                             | 1.34                                                          |
| 221268_s_at     | sphingosine-1-phosphate phosphatase 1                                      | 1.33                                                          |
| 213927_at       | mitogen-activated protein kinase kinase kinase 9                           | 1.33                                                          |
| 209301_at       | carbonic anhydrase II                                                      | 1.33                                                          |
| 205404_at       | hydroxysteroid (11-beta) dehydrogenase 1                                   | 1.32                                                          |
| 206247_at       | MHC class I polypeptide-related sequence B                                 | 1.32                                                          |
| 206170_at       | adrenergic, beta-2-, receptor, surface                                     | 1.32                                                          |
| 218644_at       | pleckstrin 2                                                               | 1.30                                                          |
| 209524_at       | hepatoma-derived growth factor, related protein 3                          | 1.30                                                          |
| 216548_x_at     | high-mobility group box pseudogene 1                                       | 1.30                                                          |
| 204203_at       | CCAAT/enhancer binding protein (C/EBP), gamma                              | 1.30                                                          |
| 210854_x_at     | solute carrier family 6 (neurotransmitter transporter, creatine), member 8 | 1.29                                                          |
| 204222_s_at     | GLI pathogenesis-related 1                                                 | 1.29                                                          |
| 217790_s_at     | signal sequence receptor, gamma (translocon-associated protein gamma)      | 1.28                                                          |
| 218817_at       | signal peptidase complex subunit 3 homolog (S. cerevisiae)                 | 1.28                                                          |
| 39402_at        | interleukin 1, beta                                                        | 1.27                                                          |
| 202712_s_at     | creatine kinase, mitochondrial 1A / creatine kinase,                       | 1.27                                                          |



**Supplemental Gene List I. Airway Basal Cell Signature Genes Analyzed (cont. page 17)**

| <b>Probe ID</b> | <b>Gene name</b>                                                                                             | <b>Median of normalized expression levels in lung adenoCa</b> |
|-----------------|--------------------------------------------------------------------------------------------------------------|---------------------------------------------------------------|
|                 | mitochondrial 1B                                                                                             |                                                               |
| 221027_s_at     | phospholipase A2, group XIIA                                                                                 | 1.25                                                          |
| 204639_at       | adenosine deaminase                                                                                          | 1.25                                                          |
| 219275_at       | programmed cell death 5                                                                                      | 1.25                                                          |
| 206467_x_at     | regulator of telomere elongation helicase 1 /// tumor necrosis factor receptor superfamily, member 6b, decoy | 1.23                                                          |
| 213100_at       | unc-5 homolog B (C. elegans)                                                                                 | 1.22                                                          |
| 209441_at       | Rho-related BTB domain containing 2                                                                          | 1.22                                                          |
| 209714_s_at     | cyclin-dependent kinase inhibitor 3                                                                          | 1.22                                                          |
| 217094_s_at     | itchy E3 ubiquitin protein ligase homolog (mouse)                                                            | 1.22                                                          |
| 218392_x_at     | sideroflexin 1                                                                                               | 1.21                                                          |
| 220892_s_at     | phosphoserine aminotransferase 1                                                                             | 1.21                                                          |
| 204058_at       | malic enzyme 1, NADP(+)-dependent, cytosolic                                                                 | 1.21                                                          |
| 219901_at       | FYVE, RhoGEF and PH domain containing 6                                                                      | 1.20                                                          |
| 218055_s_at     | WD repeat domain 41                                                                                          | 1.19                                                          |
| 204819_at       | FYVE, RhoGEF and PH domain containing 1                                                                      | 1.19                                                          |
| 219366_at       | apoptosis, caspase activation inhibitor                                                                      | 1.19                                                          |
| 219959_at       | molybdenum cofactor sulfurase                                                                                | 1.18                                                          |
| 218705_s_at     | sorting nexin 24                                                                                             | 1.17                                                          |
| 218077_s_at     | zinc finger, DHHC-type containing 3                                                                          | 1.17                                                          |
| 216971_s_at     | Plectin                                                                                                      | 1.17                                                          |
| 205904_at       | MHC class I polypeptide-related sequence A                                                                   | 1.17                                                          |
| 210357_s_at     | spermine oxidase                                                                                             | 1.16                                                          |
| 201397_at       | phosphoglycerate dehydrogenase                                                                               | 1.16                                                          |
| 219892_at       | transmembrane 6 superfamily member 1                                                                         | 1.15                                                          |
| 213230_at       | cerebellar degeneration-related protein 2-like                                                               | 1.13                                                          |
| 203650_at       | protein C receptor, endothelial                                                                              | 1.13                                                          |
| 218700_s_at     | RAB7, member RAS oncogene family-like 1                                                                      | 1.11                                                          |
| 37966_at        | parvin, beta                                                                                                 | 1.11                                                          |
| 205234_at       | solute carrier family 16, member 4 (monocarboxylic acid transporter 5)                                       | 1.11                                                          |
| 219431_at       | Rho GTPase activating protein 10                                                                             | 1.11                                                          |
| 203888_at       | thrombomodulin                                                                                               | 1.11                                                          |
| 214866_at       | plasminogen activator, urokinase receptor                                                                    | 1.10                                                          |
| 206857_s_at     | FK506 binding protein 1B, 12.6 kDa                                                                           | 1.10                                                          |
| 201181_at       | guanine nucleotide binding protein (G protein), alpha inhibiting activity polypeptide 3                      | 1.09                                                          |
| 219569_s_at     | transmembrane protein 22                                                                                     | 1.08                                                          |

**Supplemental Gene List I. Airway Basal Cell Signature Genes Analyzed (cont. page 18)**

| <b>Probe ID</b> | <b>Gene name</b>                                                                                 | <b>Median of normalized expression levels in lung adenoCa</b> |
|-----------------|--------------------------------------------------------------------------------------------------|---------------------------------------------------------------|
| 219878_s_at     | Kruppel-like factor 13                                                                           | 1.08                                                          |
| 210705_s_at     | tripartite motif-containing 5                                                                    | 1.06                                                          |
| 221803_s_at     | nuclear receptor binding factor 2                                                                | 1.05                                                          |
| 220610_s_at     | leucine rich repeat (in FLII) interacting protein 2                                              | 1.04                                                          |
| 219271_at       | UDP-N-acetyl-alpha-D-galactosamine:polypeptide N-acetylgalactosaminyltransferase 14 (GalNAc-T14) | 1.03                                                          |
| 204005_s_at     | PRKC, apoptosis, WT1, regulator                                                                  | 1.02                                                          |
| 213358_at       | KIAA0802                                                                                         | 1.02                                                          |
| 202570_s_at     | discs, large (Drosophila) homolog-associated protein 4                                           | 1.02                                                          |
| 219390_at       | FK506 binding protein 14, 22 kDa                                                                 | 1.02                                                          |
| 202067_s_at     | low density lipoprotein receptor                                                                 | 1.00                                                          |
| 209825_s_at     | uridine-cytidine kinase 2                                                                        | 1.00                                                          |
| 220789_s_at     | transforming growth factor beta regulator 4                                                      | 1.00                                                          |
| 204244_s_at     | DBF4 homolog (S. cerevisiae)                                                                     | 0.99                                                          |
| 204527_at       | myosin VA (heavy chain 12, myosin)                                                               | 0.99                                                          |
| 212816_s_at     | cystathionine-beta-synthase                                                                      | 0.98                                                          |
| 202843_at       | DnaJ (Hsp40) homolog, subfamily B, member 9                                                      | 0.98                                                          |
| 210041_s_at     | phosphoglucomutase 3                                                                             | 0.97                                                          |
| 221902_at       | G protein-coupled receptor 153                                                                   | 0.97                                                          |
| 205618_at       | proline rich Gla (G-carboxyglutamic acid) 1                                                      | 0.97                                                          |
| 205579_at       | histamine receptor H1                                                                            | 0.97                                                          |
| 221009_s_at     | angiopoietin-like 4                                                                              | 0.95                                                          |
| 218775_s_at     | WW and C2 domain containing 2                                                                    | 0.95                                                          |
| 208084_at       | integrin, beta 6                                                                                 | 0.94                                                          |
| 219582_at       | opioid growth factor receptor-like 1                                                             | 0.94                                                          |
| 220239_at       | kelch-like 7 (Drosophila)                                                                        | 0.94                                                          |
| 204120_s_at     | adenosine kinase                                                                                 | 0.94                                                          |
| 203889_at       | secretogranin V (7B2 protein)                                                                    | 0.93                                                          |
| 219058_x_at     | tubulointerstitial nephritis antigen-like 1                                                      | 0.93                                                          |
| 209371_s_at     | SH3-domain binding protein 2                                                                     | 0.93                                                          |
| 220122_at       | multiple C2 domains, transmembrane 1                                                             | 0.93                                                          |
| 222173_s_at     | TBC1 domain family, member 2                                                                     | 0.93                                                          |
| 218772_x_at     | transmembrane protein 38B                                                                        | 0.92                                                          |
| 204653_at       | transcription factor AP-2 alpha (activating enhancer binding protein 2 alpha)                    | 0.91                                                          |
| 219938_s_at     | proline-serine-threonine phosphatase interacting protein 2                                       | 0.91                                                          |
| 204958_at       | polo-like kinase 3                                                                               | 0.91                                                          |
| 205567_at       | carbohydrate (keratan sulfate Gal-6) sulfotransferase 1                                          | 0.91                                                          |

**Supplemental Gene List I. Airway Basal Cell Signature Genes Analyzed (cont. page 19)**

| <b>Probe ID</b> | <b>Gene name</b>                                                                                                           | <b>Median of normalized expression levels in lung adenoCa</b> |
|-----------------|----------------------------------------------------------------------------------------------------------------------------|---------------------------------------------------------------|
| 215243_s_at     | gap junction protein, beta 3, 31kDa                                                                                        | 0.91                                                          |
| 219654_at       | protein tyrosine phosphatase-like (proline instead of catalytic arginine), member A                                        | 0.90                                                          |
| 219361_s_at     | apoptosis enhancing nuclease                                                                                               | 0.89                                                          |
| 213012_at       | neural precursor cell expressed, developmentally down-regulated 4                                                          | 0.89                                                          |
| 205330_at       | meningioma (disrupted in balanced translocation) 1                                                                         | 0.89                                                          |
| 204750_s_at     | desmocollin 2                                                                                                              | 0.88                                                          |
| 203023_at       | NOP16 nucleolar protein homolog (yeast)                                                                                    | 0.88                                                          |
| 219979_s_at     | chromosome 11 open reading frame 73                                                                                        | 0.87                                                          |
| 210074_at       | cathepsin L2                                                                                                               | 0.87                                                          |
| 221779_at       | MICAL-like 1                                                                                                               | 0.86                                                          |
| 209946_at       | vascular endothelial growth factor C                                                                                       | 0.86                                                          |
| 204462_s_at     | solute carrier family 16, member 2 (monocarboxylic acid transporter 8)                                                     | 0.86                                                          |
| 209589_s_at     | EPH receptor B2                                                                                                            | 0.85                                                          |
| 209885_at       | ras homolog gene family, member D                                                                                          | 0.84                                                          |
| 209758_s_at     | microfibrillar associated protein 5                                                                                        | 0.83                                                          |
| 218484_at       | NADH dehydrogenase (ubiquinone) 1 alpha subcomplex, 4-like 2                                                               | 0.83                                                          |
| 203597_s_at     | WW domain binding protein 4 (formin binding protein 21)                                                                    | 0.83                                                          |
| 214073_at       | cortactin                                                                                                                  | 0.81                                                          |
| 217678_at       | solute carrier family 7, (cationic amino acid transporter, y+ system) member 11                                            | 0.81                                                          |
| 212662_at       | poliovirus receptor                                                                                                        | 0.80                                                          |
| 218818_at       | four and a half LIM domains 3                                                                                              | 0.80                                                          |
| 219911_s_at     | solute carrier organic anion transporter family, member 4A1                                                                | 0.80                                                          |
| 221127_s_at     | dickkopf homolog 3 (Xenopus laevis)                                                                                        | 0.79                                                          |
| 210005_at       | phosphoribosylglycinamide formyltransferase, phosphoribosylglycinamide synthetase, phosphoribosylaminoimidazole synthetase | 0.79                                                          |
| 206295_at       | interleukin 18 (interferon-gamma-inducing factor)                                                                          | 0.78                                                          |
| 206482_at       | PTK6 protein tyrosine kinase 6                                                                                             | 0.78                                                          |
| 213338_at       | transmembrane protein 158 (gene/pseudogene)                                                                                | 0.78                                                          |
| 205421_at       | solute carrier family 22 (extraneuronal monoamine transporter), member 3                                                   | 0.77                                                          |
| 213419_at       | amyloid beta (A4) precursor protein-binding, family B, member 2                                                            | 0.77                                                          |

**Supplemental Gene List I. Airway Basal Cell Signature Genes Analyzed (cont. page 20)**

| <b>Probe ID</b> | <b>Gene name</b>                                                                                                                                                      | <b>Median of normalized expression levels in lung adenoCa</b> |
|-----------------|-----------------------------------------------------------------------------------------------------------------------------------------------------------------------|---------------------------------------------------------------|
| 210017_at       | mucosa associated lymphoid tissue lymphoma translocation gene 1                                                                                                       | 0.77                                                          |
| 203946_s_at     | arginase, type II                                                                                                                                                     | 0.76                                                          |
| 204944_at       | protein tyrosine phosphatase, receptor type, G                                                                                                                        | 0.76                                                          |
| 209152_s_at     | transcription factor 3 (E2A immunoglobulin enhancer binding factors E12/E47)                                                                                          | 0.76                                                          |
| 219181_at       | lipase, endothelial                                                                                                                                                   | 0.75                                                          |
| 204165_at       | WAS protein family, member 1                                                                                                                                          | 0.74                                                          |
| 217253_at       | SH3-domain binding protein 2                                                                                                                                          | 0.74                                                          |
| 201564_s_at     | fascin homolog 1, actin-bundling protein (Strongylocentrotus purpuratus)                                                                                              | 0.74                                                          |
| 205376_at       | inositol polyphosphate-4-phosphatase, type II, 105kDa                                                                                                                 | 0.74                                                          |
| 204602_at       | dickkopf homolog 1 (Xenopus laevis)                                                                                                                                   | 0.73                                                          |
| 206034_at       | serpin peptidase inhibitor, clade B (ovalbumin), member 8                                                                                                             | 0.73                                                          |
| 217027_x_at     | karyopherin (importin) beta 1                                                                                                                                         | 0.73                                                          |
| 41037_at        | TEA domain family member 4                                                                                                                                            | 0.72                                                          |
| 205083_at       | aldehyde oxidase 1                                                                                                                                                    | 0.71                                                          |
| 205865_at       | AT rich interactive domain 3A (BRIGHT-like)                                                                                                                           | 0.70                                                          |
| 214452_at       | branched chain amino-acid transaminase 1, cytosolic                                                                                                                   | 0.70                                                          |
| 220658_s_at     | aryl hydrocarbon receptor nuclear translocator-like 2                                                                                                                 | 0.69                                                          |
| 205195_at       | adaptor-related protein complex 1, sigma 1 subunit                                                                                                                    | 0.69                                                          |
| 205174_s_at     | glutaminyl-peptide cyclotransferase                                                                                                                                   | 0.69                                                          |
| 206204_at       | growth factor receptor-bound protein 14                                                                                                                               | 0.69                                                          |
| 213523_at       | cyclin E1                                                                                                                                                             | 0.68                                                          |
| 204078_at       | leprecan-like 4                                                                                                                                                       | 0.68                                                          |
| 206125_s_at     | kallikrein-related peptidase 8                                                                                                                                        | 0.67                                                          |
| 213680_at       | keratin 6B                                                                                                                                                            | 0.67                                                          |
| 204347_at       | adenylate kinase 4                                                                                                                                                    | 0.66                                                          |
| 213262_at       | spastic ataxia of Charlevoix-Saguenay (sacsin)                                                                                                                        | 0.65                                                          |
| 208510_s_at     | peroxisome proliferator-activated receptor gamma                                                                                                                      | 0.64                                                          |
| 217127_at       | cystathionase (cystathionine gamma-lyase)                                                                                                                             | 0.64                                                          |
| 215812_s_at     | solute carrier family 6 (neurotransmitter transporter, creatine), member 10 (pseudogene) / solute carrier family 6 (neurotransmitter transporter, creatine), member 8 | 0.64                                                          |
| 219921_s_at     | dedicator of cytokinesis 5                                                                                                                                            | 0.63                                                          |
| 217999_s_at     | pleckstrin homology-like domain, family A, member 1                                                                                                                   | 0.63                                                          |
| 219973_at       | arylsulfatase family, member J                                                                                                                                        | 0.62                                                          |
| 211031_s_at     | CAP-GLY domain containing linker protein 2                                                                                                                            | 0.62                                                          |

**Supplemental Gene List I. Airway Basal Cell Signature Genes Analyzed (cont. page 21)**

| <b>Probe ID</b> | <b>Gene name</b>                                                                               | <b>Median of normalized expression levels in lung adenoCa</b> |
|-----------------|------------------------------------------------------------------------------------------------|---------------------------------------------------------------|
| 213112_s_at     | sequestosome 1                                                                                 | 0.62                                                          |
| 221078_s_at     | coiled-coil domain containing 88A                                                              | 0.61                                                          |
| 34187_at        | RNA binding motif, single stranded interacting protein 2                                       | 0.61                                                          |
| 214599_at       | involucrin                                                                                     | 0.61                                                          |
| 213992_at       | collagen, type IV, alpha 6                                                                     | 0.60                                                          |
| 219631_at       | low density lipoprotein receptor-related protein 12                                            | 0.60                                                          |
| 213847_at       | peripherin                                                                                     | 0.59                                                          |
| 220255_at       | Fanconi anemia, complementation group E                                                        | 0.59                                                          |
| 215082_at       | ELOVL family member 5, elongation of long chain fatty acids (FEN1/Elo2, SUR4/Elo3-like, yeast) | 0.58                                                          |
| 206173_x_at     | GA binding protein transcription factor, beta subunit 1                                        | 0.58                                                          |
| 215167_at       | mediator complex subunit 14                                                                    | 0.58                                                          |
| 206412_at       | fer (fps/fes related) tyrosine kinase                                                          | 0.58                                                          |
| 204733_at       | kallikrein-related peptidase 6                                                                 | 0.58                                                          |
| 204920_at       | carbamoyl-phosphate synthase 1, mitochondrial                                                  | 0.58                                                          |
| 205341_at       | EH-domain containing 2                                                                         | 0.57                                                          |
| 207020_at       | heat shock transcription factor 2 binding protein                                              | 0.57                                                          |
| 219522_at       | four jointed box 1 (Drosophila)                                                                | 0.57                                                          |
| 218537_at       | host cell factor C1 regulator 1 (XPO1 dependent)                                               | 0.55                                                          |
| 200951_s_at     | cyclin D2                                                                                      | 0.55                                                          |
| 205503_at       | protein tyrosine phosphatase, non-receptor type 14                                             | 0.54                                                          |
| 222242_s_at     | kallikrein-related peptidase 5                                                                 | 0.54                                                          |
| 219944_at       | CAP-GLY domain containing linker protein family, member 4                                      | 0.54                                                          |
| 209595_at       | general transcription factor IIF, polypeptide 2, 30kDa                                         | 0.53                                                          |
| 217150_s_at     | neurofibromin 2 (merlin)                                                                       | 0.53                                                          |
| 205394_at       | CHK1 checkpoint homolog (S. pombe)                                                             | 0.53                                                          |
| 207463_x_at     | protease, serine, 3                                                                            | 0.53                                                          |
| 204136_at       | collagen, type VII, alpha 1                                                                    | 0.52                                                          |
| 203071_at       | sema domain, immunoglobulin domain (Ig), short basic domain, secreted, (semaphorin) 3B         | 0.52                                                          |
| 214095_at       | serine hydroxymethyltransferase 2 (mitochondrial)                                              | 0.51                                                          |
| 206561_s_at     | aldo-keto reductase family 1, member B10 (aldose reductase)                                    | 0.51                                                          |
| 219225_at       | piggyBac transposable element derived 5                                                        | 0.50                                                          |
| 218744_s_at     | protein kinase C and casein kinase substrate in neurons 3                                      | 0.50                                                          |
| 205402_x_at     | protease, serine, 2 (trypsin 2)                                                                | 0.50                                                          |
| 210015_s_at     | microtubule-associated protein 2                                                               | 0.50                                                          |

**Supplemental Gene List I. Airway Basal Cell Signature Genes Analyzed (cont. page 22)**

| <b>Probe ID</b> | <b>Gene name</b>                                                                        | <b>Median of normalized expression levels in lung adenoCa</b> |                   |
|-----------------|-----------------------------------------------------------------------------------------|---------------------------------------------------------------|-------------------|
| 213984_at       | PDS5, regulator of cohesion maintenance, homolog A (S. cerevisiae)                      | 0.49                                                          | Below 0.5x median |
| 208025_s_at     | high mobility group AT-hook 2                                                           | 0.49                                                          | Below 0.5x median |
| 204854_at       | leprecan-like 2                                                                         | 0.49                                                          | Below 0.5x median |
| 209544_at       | receptor-interacting serine-threonine kinase 2                                          | 0.49                                                          | Below 0.5x median |
| 219270_at       | ChaC, cation transport regulator homolog 1 (E. coli)                                    | 0.48                                                          | Below 0.5x median |
| 206023_at       | neuromedin U                                                                            | 0.48                                                          | Below 0.5x median |
| 205157_s_at     | keratin 17                                                                              | 0.48                                                          | Below 0.5x median |
| 211905_s_at     | integrin, beta 4                                                                        | 0.48                                                          | Below 0.5x median |
| 216470_x_at     | protease, serine, 1 (trypsin 1) / protease, serine, 2 (trypsin 2) / protease, serine, 3 | 0.48                                                          | Below 0.5x median |
| 205064_at       | small proline-rich protein 1B                                                           | 0.46                                                          | Below 0.5x median |
| 215918_s_at     | spectrin, beta, non-erythrocytic 1                                                      | 0.46                                                          | Below 0.5x median |
| 206686_at       | pyruvate dehydrogenase kinase, isozyme 1                                                | 0.44                                                          | Below 0.5x median |
| 219702_at       | placenta-specific 1                                                                     | 0.44                                                          | Below 0.5x median |
| 214967_at       | CDNA FLJ12055 fis, clone HEMBB1002049                                                   | 0.43                                                          | Below 0.5x median |
| 201820_at       | keratin 5                                                                               | 0.42                                                          | Below 0.5x median |
| 222269_at       | apolipoprotein O-like                                                                   | 0.42                                                          | Below 0.5x median |
| 217559_at       | ribosomal protein L10-like                                                              | 0.42                                                          | Below 0.5x median |
| 209646_x_at     | aldehyde dehydrogenase 1 family, member B1                                              | 0.42                                                          | Below 0.5x median |
| 205796_at       | t-complex 11 (mouse)-like 1                                                             | 0.41                                                          | Below 0.5x median |
| 203967_at       | cell division cycle 6 homolog (S. cerevisiae)                                           | 0.41                                                          | Below 0.5x median |
| 209652_s_at     | placental growth factor                                                                 | 0.41                                                          | Below 0.5x median |
| 209125_at       | keratin 6A                                                                              | 0.41                                                          | Below 0.5x median |
| 214126_at       | mitochondrial carrier triple repeat 1                                                   | 0.40                                                          | Below 0.5x median |
| 204420_at       | FOS-like antigen 1                                                                      | 0.39                                                          | Below 0.5x median |
| 207382_at       | tumor protein p63                                                                       | 0.39                                                          | Below 0.5x median |
| 201249_at       | solute carrier family 2 (facilitated glucose transporter), member 1                     | 0.39                                                          | Below 0.5x median |
| 207526_s_at     | interleukin 1 receptor-like 1                                                           | 0.39                                                          | Below 0.5x median |
| 215199_at       | caldesmon 1                                                                             | 0.38                                                          | Below 0.5x median |
| 219998_at       | galectin-related protein                                                                | 0.38                                                          | Below 0.5x median |
| 222309_at       | hypothetical LOC100506935                                                               | 0.38                                                          | Below 0.5x median |
| 219987_at       | Similar to Uncharacterized protein LP9056                                               | 0.38                                                          | Below 0.5x median |
| 203736_s_at     | PTPRF interacting protein, binding protein 1 (liprin beta 1)                            | 0.37                                                          | Below 0.5x median |
| 204455_at       | dystonin                                                                                | 0.37                                                          | Below 0.5x median |
| 207345_at       | follistatin                                                                             | 0.36                                                          | Below 0.5x median |
| 219936_s_at     | G protein-coupled receptor 87                                                           | 0.35                                                          | Below 0.5x median |

**Supplemental Gene List I. Airway Basal Cell Signature Genes Analyzed (cont. page 23)**

| <b>Probe ID</b> | <b>Gene name</b>                                                                       | <b>Median of normalized expression levels in lung adenoCa</b> |                   |
|-----------------|----------------------------------------------------------------------------------------|---------------------------------------------------------------|-------------------|
| 209631_s_at     | G protein-coupled receptor 37 (endothelin receptor type B-like)                        | 0.35                                                          | Below 0.5x median |
| 208425_s_at     | tetratricopeptide repeat, ankyrin repeat and coiled-coil containing 2                  | 0.34                                                          | Below 0.5x median |
| 205691_at       | synaptogyrin 3                                                                         | 0.34                                                          | Below 0.5x median |
| 214297_at       | chondroitin sulfate proteoglycan 4                                                     | 0.34                                                          | Below 0.5x median |
| 205429_s_at     | membrane protein, palmitoylated 6 (MAGUK p55 subfamily member 6)                       | 0.34                                                          | Below 0.5x median |
| 211846_s_at     | poliovirus receptor-related 1 (herpesvirus entry mediator C)                           | 0.33                                                          | Below 0.5x median |
| 220638_s_at     | Cas-Br-M (murine) ecotropic retroviral transforming sequence c                         | 0.33                                                          | Below 0.5x median |
| 208260_at       | arginine vasopressin receptor 1B                                                       | 0.33                                                          | Below 0.5x median |
| 204952_at       | LY6/PLAUR domain containing 3                                                          | 0.33                                                          | Below 0.5x median |
| 203184_at       | fibrillin 2                                                                            | 0.32                                                          | Below 0.5x median |
| 205899_at       | cyclin A1                                                                              | 0.32                                                          | Below 0.5x median |
| 205595_at       | desmoglein 3                                                                           | 0.32                                                          | Below 0.5x median |
| 208511_at       | pituitary tumor-transforming 3 (pseudogene)                                            | 0.31                                                          | Below 0.5x median |
| 206032_at       | desmocollin 3                                                                          | 0.31                                                          | Below 0.5x median |
| 202684_s_at     | RNA (guanine-7-) methyltransferase                                                     | 0.31                                                          | Below 0.5x median |
| 206371_at       | folate receptor 3 (gamma)                                                              | 0.31                                                          | Below 0.5x median |
| 209877_at       | synuclein, gamma (breast cancer-specific protein 1)                                    | 0.31                                                          | Below 0.5x median |
| 207717_s_at     | plakophilin 2                                                                          | 0.30                                                          | Below 0.5x median |
| 219555_s_at     | centromere protein N                                                                   | 0.30                                                          | Below 0.5x median |
| 221414_s_at     | defensin, beta 126                                                                     | 0.30                                                          | Below 0.5x median |
| 219926_at       | popeye domain containing 3                                                             | 0.30                                                          | Below 0.5x median |
| 210113_s_at     | NLR family, pyrin domain containing 1                                                  | 0.29                                                          | Below 0.5x median |
| 220058_at       | chromosome 17 open reading frame 39                                                    | 0.29                                                          | Below 0.5x median |
| 217553_at       | STEAP family protein MGC87042                                                          | 0.28                                                          | Below 0.5x median |
| 206832_s_at     | sema domain, immunoglobulin domain (Ig), short basic domain, secreted, (semaphorin) 3F | 0.28                                                          | Below 0.5x median |
| 220198_s_at     | eukaryotic translation initiation factor 5A2                                           | 0.28                                                          | Below 0.5x median |
| 215058_at       | DENN/MADD domain containing 5B                                                         | 0.27                                                          | Below 0.5x median |
| 206080_at       | phospholipase C, eta 2                                                                 | 0.27                                                          | Below 0.5x median |
| 215465_at       | ATP-binding cassette, sub-family A (ABC1), member 12                                   | 0.26                                                          | Below 0.5x median |
| 205778_at       | kallikrein-related peptidase 7                                                         | 0.26                                                          | Below 0.5x median |
| 203438_at       | stanniocalcin 2                                                                        | 0.26                                                          | Below 0.5x median |
| 210138_at       | regulator of G-protein signaling 20                                                    | 0.26                                                          | Below 0.5x median |
| 219909_at       | matrix metalloproteinase 28                                                            | 0.26                                                          | Below 0.5x median |

**Supplemental Gene List I. Airway Basal Cell Signature Genes Analyzed (cont. page 24)**

| <b>Probe ID</b> | <b>Gene name</b>                                                                          | <b>Median of normalized expression levels in lung adenoCa</b> |                   |
|-----------------|-------------------------------------------------------------------------------------------|---------------------------------------------------------------|-------------------|
| 214240_at       | galanin prepropeptide                                                                     | 0.26                                                          | Below 0.5x median |
| 204560_at       | FK506 binding protein 5                                                                   | 0.25                                                          | Below 0.5x median |
| 205122_at       | transmembrane protein with EGF-like and two follistatin-like domains 1                    | 0.25                                                          | Below 0.5x median |
| 215074_at       | myosin IB                                                                                 | 0.25                                                          | Below 0.5x median |
| 221994_at       | PDZ and LIM domain 5                                                                      | 0.25                                                          | Below 0.5x median |
| 204614_at       | serpin peptidase inhibitor, clade B (ovalbumin), member 2                                 | 0.24                                                          | Below 0.5x median |
| 220484_at       | mucolin 3                                                                                 | 0.24                                                          | Below 0.5x median |
| 209792_s_at     | kallikrein-related peptidase 10                                                           | 0.24                                                          | Below 0.5x median |
| 209909_s_at     | transforming growth factor, beta 2                                                        | 0.24                                                          | Below 0.5x median |
| 219247_s_at     | zinc finger, DHHC-type containing 14                                                      | 0.23                                                          | Below 0.5x median |
| 206091_at       | matrilin 3                                                                                | 0.23                                                          | Below 0.5x median |
| 210233_at       | interleukin 1 receptor accessory protein                                                  | 0.23                                                          | Below 0.5x median |
| 205827_at       | cholecystokinin                                                                           | 0.22                                                          | Below 0.5x median |
| 214078_at       | p21 protein (Cdc42/Rac)-activated kinase 3                                                | 0.22                                                          | Below 0.5x median |
| 220431_at       | transmembrane protease, serine 11E                                                        | 0.22                                                          | Below 0.5x median |
| 210248_at       | wingless-type MMTV integration site family, member 7A                                     | 0.21                                                          | Below 0.5x median |
| 220685_at       | family with sequence similarity 120C                                                      | 0.21                                                          | Below 0.5x median |
| 210286_s_at     | solute carrier family 4, sodium bicarbonate cotransporter, member 7                       | 0.21                                                          | Below 0.5x median |
| 206172_at       | interleukin 13 receptor, alpha 2                                                          | 0.21                                                          | Below 0.5x median |
| 218602_s_at     | HAUS augmin-like complex, subunit 6                                                       | 0.21                                                          | Below 0.5x median |
| 208231_at       | neuregulin 1                                                                              | 0.20                                                          | Below 0.5x median |
| 205830_at       | calmegin                                                                                  | 0.20                                                          | Below 0.5x median |
| 205767_at       | epiregulin                                                                                | 0.20                                                          | Below 0.5x median |
| 220362_at       | psoriasis susceptibility 1 candidate 1                                                    | 0.20                                                          | Below 0.5x median |
| 206581_at       | basonuclin 1                                                                              | 0.20                                                          | Below 0.5x median |
| 204422_s_at     | fibroblast growth factor 2 (basic)                                                        | 0.19                                                          | Below 0.5x median |
| 204818_at       | hydroxysteroid (17-beta) dehydrogenase 2                                                  | 0.19                                                          | Below 0.5x median |
| 218964_at       | AT rich interactive domain 3B (BRIGHT-like)                                               | 0.18                                                          | Below 0.5x median |
| 220102_at       | forkhead box L2                                                                           | 0.18                                                          | Below 0.5x median |
| 205493_s_at     | dihydropyrimidinase-like 4                                                                | 0.18                                                          | Below 0.5x median |
| 214521_at       | hairy and enhancer of split 2 (Drosophila)                                                | 0.17                                                          | Below 0.5x median |
| 220214_at       | zinc finger protein 215                                                                   | 0.17                                                          | Below 0.5x median |
| 210654_at       | tumor necrosis factor receptor superfamily, member 10d, decoy with truncated death domain | 0.17                                                          | Below 0.5x median |
| 210355_at       | parathyroid hormone-like hormone                                                          | 0.16                                                          | Below 0.5x median |
| 220672_at       | protein phosphatase 4, regulatory subunit 4                                               | 0.16                                                          | Below 0.5x median |



**Supplemental Gene List I. Airway Basal Cell Signature Genes Analyzed (cont. page 25)**

| <b>Probe ID</b> | <b>Gene name</b>                                                                                                                                      | <b>Median of normalized expression levels in lung adenoCa</b> |                   |
|-----------------|-------------------------------------------------------------------------------------------------------------------------------------------------------|---------------------------------------------------------------|-------------------|
| 222265_at       | tensin 4                                                                                                                                              | 0.16                                                          | Below 0.5x median |
| 212821_at       | pleckstrin homology domain containing, family G (with RhoGef domain) member 3                                                                         | 0.15                                                          | Below 0.5x median |
| 219550_at       | roundabout, axon guidance receptor, homolog 3 (Drosophila)                                                                                            | 0.15                                                          | Below 0.5x median |
| 209800_at       | keratin 16                                                                                                                                            | 0.15                                                          | Below 0.5x median |
| 219855_at       | nudix (nucleoside diphosphate linked moiety X)-type motif 11                                                                                          | 0.14                                                          | Below 0.5x median |
| 206307_s_at     | forkhead box D1                                                                                                                                       | 0.14                                                          | Below 0.5x median |
| 210244_at       | cathelicidin antimicrobial peptide                                                                                                                    | 0.13                                                          | Below 0.5x median |
| 207017_at       | RAB27B, member RAS oncogene family                                                                                                                    | 0.13                                                          | Below 0.5x median |
| 204726_at       | cadherin 13, H-cadherin (heart)                                                                                                                       | 0.13                                                          | Below 0.5x median |
| 210587_at       | inhibin, beta E                                                                                                                                       | 0.12                                                          | Below 0.5x median |
| 202235_at       | solute carrier family 16, member 1 (monocarboxylic acid transporter 1)                                                                                | 0.12                                                          | Below 0.5x median |
| 221291_at       | UL16 binding protein 2                                                                                                                                | 0.12                                                          | Below 0.5x median |
| 216564_at       | similar to Argininosuccinate synthase (Citrulline--aspartate ligase)                                                                                  | 0.12                                                          | Below 0.5x median |
| 218990_s_at     | small proline-rich protein 3                                                                                                                          | 0.12                                                          | Below 0.5x median |
| 204411_at       | kinesin family member 21B                                                                                                                             | 0.12                                                          | Below 0.5x median |
| 203331_s_at     | inositol polyphosphate-5-phosphatase, 145kDa                                                                                                          | 0.12                                                          | Below 0.5x median |
| 210237_at       | Artemin                                                                                                                                               | 0.12                                                          | Below 0.5x median |
| 204760_s_at     | nuclear receptor subfamily 1, group D, member 1 /// thyroid hormone receptor, alpha (erythroblastic leukemia viral (v-erb-a) oncogene homolog, avian) | 0.11                                                          | Below 0.5x median |
| 213865_at       | discoidin, CUB and LCCL domain containing 2                                                                                                           | 0.11                                                          | Below 0.5x median |
| 204855_at       | serpin peptidase inhibitor, clade B (ovalbumin), member 5                                                                                             | 0.10                                                          | Below 0.5x median |
| 206400_at       | lectin, galactoside-binding, soluble, 7 / lectin, galactoside-binding, soluble, 7B                                                                    | 0.10                                                          | Below 0.5x median |
| 206569_at       | interleukin 24                                                                                                                                        | 0.10                                                          | Below 0.5x median |
| 202755_s_at     | glypican 1                                                                                                                                            | 0.09                                                          | Below 0.5x median |
| 219930_at       | Kruppel-like factor 8                                                                                                                                 | 0.09                                                          | Below 0.5x median |
| 213201_s_at     | troponin T type 1 (skeletal, slow)                                                                                                                    | 0.09                                                          | Below 0.5x median |
| 206354_at       | solute carrier organic anion transporter family, member 1B3                                                                                           | 0.08                                                          | Below 0.5x median |
| 208539_x_at     | small proline-rich protein 2B                                                                                                                         | 0.08                                                          | Below 0.5x median |
| 205460_at       | neuronal PAS domain protein 2                                                                                                                         | 0.08                                                          | Below 0.5x median |
| 220289_s_at     | absent in melanoma 1-like                                                                                                                             | 0.08                                                          | Below 0.5x median |
| 204636_at       | collagen, type XVII, alpha 1                                                                                                                          | 0.07                                                          | Below 0.5x median |

**Supplemental Gene List I. Airway Basal Cell Signature Genes Analyzed (cont. page 26)**

| <b>Probe ID</b> | <b>Gene name</b>                                                                                 | <b>Median of normalized expression levels in lung adenoCa</b> |                   |
|-----------------|--------------------------------------------------------------------------------------------------|---------------------------------------------------------------|-------------------|
| 206122_at       | SRY (sex determining region Y)-box 15                                                            | 0.07                                                          | Below 0.5x median |
| 220620_at       | cysteine-rich C-terminal 1                                                                       | 0.06                                                          | Below 0.5x median |
| 221784_at       | widely interspaced zinc finger motifs                                                            | 0.06                                                          | Below 0.5x median |
| 219532_at       | elongation of very long chain fatty acids (FEN1/Elo2, SUR4/Elo3, yeast)-like 4                   | 0.06                                                          | Below 0.5x median |
| 206877_at       | MAX dimerization protein 1                                                                       | 0.06                                                          | Below 0.5x median |
| 206421_s_at     | serpin peptidase inhibitor, clade B (ovalbumin), member 7                                        | 0.05                                                          | Below 0.5x median |
| 221854_at       | plakophilin 1 (ectodermal dysplasia/skin fragility syndrome)                                     | 0.05                                                          | Below 0.5x median |
| 207302_at       | sarcoglycan, gamma (35kDa dystrophin-associated glycoprotein)                                    | 0.05                                                          | Below 0.5x median |
| 214595_at       | potassium voltage-gated channel, subfamily G, member 1                                           | 0.05                                                          | Below 0.5x median |
| 213796_at       | small proline-rich protein 1A                                                                    | 0.05                                                          | Below 0.5x median |
| 207080_s_at     | peptide YY                                                                                       | 0.05                                                          | Below 0.5x median |
| 219554_at       | Rh family, C glycoprotein                                                                        | 0.04                                                          | Below 0.5x median |
| 215729_s_at     | vestigial like 1 (Drosophila)                                                                    | 0.04                                                          | Below 0.5x median |
| 219601_s_at     | chromosome 10 open reading frame 12                                                              | 0.04                                                          | Below 0.5x median |
| 206008_at       | transglutaminase 1 (K polypeptide epidermal type I, protein-glutamine-gamma-glutamyltransferase) | 0.04                                                          | Below 0.5x median |
| 222383_s_at     | arachidonate lipoxygenase 3                                                                      | 0.04                                                          | Below 0.5x median |
| 206969_at       | keratin 34                                                                                       | 0.03                                                          | Below 0.5x median |
| 205138_s_at     | uronyl-2-sulfotransferase                                                                        | 0.03                                                          | Below 0.5x median |
| 206866_at       | cadherin 4, type 1, R-cadherin (retinal)                                                         | 0.03                                                          | Below 0.5x median |
| 220664_at       | small proline-rich protein 2C (pseudogene)                                                       | 0.03                                                          | Below 0.5x median |
| 206376_at       | solute carrier family 6 (neutral amino acid transporter), member 15                              | 0.02                                                          | Below 0.5x median |

**Supplemental Gene List II. Airway Non-basal Cell Signature Genes Analyzed**

| <b>Probe ID</b> | <b>Gene name</b>                                                                                                                       | <b>Median of normalized expression levels in lung adenoCa</b> |                 |
|-----------------|----------------------------------------------------------------------------------------------------------------------------------------|---------------------------------------------------------------|-----------------|
| 208306_x_at     | Major histocompatibility complex, class II, DR beta 3                                                                                  | 90.73                                                         | Above 2x median |
| 208894_at       | major histocompatibility complex, class II, DR alpha                                                                                   | 64.23                                                         | Above 2x median |
| 217757_at       | alpha-2-macroglobulin                                                                                                                  | 45.84                                                         | Above 2x median |
| 201137_s_at     | major histocompatibility complex, class II, DP beta 1                                                                                  | 29.14                                                         | Above 2x median |
| 217767_at       | complement component 3                                                                                                                 | 28.17                                                         | Above 2x median |
| 211991_s_at     | major histocompatibility complex, class II, DP alpha 1                                                                                 | 25.16                                                         | Above 2x median |
| 213975_s_at     | lysozyme (renal amyloidosis) ; leukocyte immunoglobulin-like receptor, subfamily B (with TM and ITIM domains), member 1                | 23.65                                                         | Above 2x median |
| 202291_s_at     | matrix Gla protein                                                                                                                     | 23.48                                                         | Above 2x median |
| 201288_at       | Rho GDP dissociation inhibitor (GDI) beta                                                                                              | 22.68                                                         | Above 2x median |
| 203892_at       | WAP four-disulfide core domain 2                                                                                                       | 22.46                                                         | Above 2x median |
| 202833_s_at     | serpin peptidase inhibitor, clade A (alpha-1 antiproteinase, antitrypsin), member 1                                                    | 21.44                                                         | Above 2x median |
| 218211_s_at     | melanophilin                                                                                                                           | 20.57                                                         | Above 2x median |
| 204124_at       | solute carrier family 34 (sodium phosphate), member 2                                                                                  | 19.17                                                         | Above 2x median |
| 202017_at       | epoxide hydrolase 1, microsomal (xenobiotic)                                                                                           | 18.82                                                         | Above 2x median |
| 202411_at       | interferon, alpha-inducible protein 27                                                                                                 | 18.17                                                         | Above 2x median |
| 217478_s_at     | major histocompatibility complex, class II, DM alpha                                                                                   | 17.85                                                         | Above 2x median |
| 209118_s_at     | tubulin, alpha 3                                                                                                                       | 17.46                                                         | Above 2x median |
| 200795_at       | SPARC-like 1 (mast9, hevin)                                                                                                            | 16.43                                                         | Above 2x median |
| 208998_at       | uncoupling protein 2 (mitochondrial, proton carrier)                                                                                   | 15.61                                                         | Above 2x median |
| 204437_s_at     | folate receptor 1 (adult)                                                                                                              | 15.38                                                         | Above 2x median |
| 211959_at       | insulin-like growth factor binding protein 5                                                                                           | 11.93                                                         | Above 2x median |
| 203416_at       | CD53 antigen                                                                                                                           | 11.46                                                         | Above 2x median |
| 214433_s_at     | selenium binding protein 1 ; selenium binding protein 1                                                                                | 11.38                                                         | Above 2x median |
| 217414_x_at     | hemoglobin, alpha 2                                                                                                                    | 11.26                                                         | Above 2x median |
| 212950_at       | G protein-coupled receptor 116                                                                                                         | 10.82                                                         | Above 2x median |
| 220532_s_at     | LR8 protein                                                                                                                            | 10.24                                                         | Above 2x median |
| 209116_x_at     | hemoglobin, beta ; hemoglobin, beta                                                                                                    | 9.23                                                          | Above 2x median |
| 204070_at       | retinoic acid receptor responder (tazarotene induced) 3                                                                                | 8.94                                                          | Above 2x median |
| 217989_at       | dehydrogenase/reductase (SDR family) member 8                                                                                          | 8.42                                                          | Above 2x median |
| 208791_at       | clusterin (complement lysis inhibitor, SP-40,40, sulfated glycoprotein 2, testosterone-repressed prostate message 2, apolipoprotein J) | 8.13                                                          | Above 2x median |
| 39249_at        | aquaporin 3                                                                                                                            | 8.06                                                          | Above 2x median |
| 207761_s_at     | DKFZP586A0522 protein                                                                                                                  | 7.63                                                          | Above 2x median |

**Supplemental Gene List II. Airway Non-basal Cell Signature Genes Analyzed  
(cont. page 2)**

| <b>Probe ID</b> | <b>Gene name</b>                                                                                                                                                        | <b>Median of normalized expression levels in lung adenoCa</b> |                 |
|-----------------|-------------------------------------------------------------------------------------------------------------------------------------------------------------------------|---------------------------------------------------------------|-----------------|
| 203799_at       | CD302 antigen                                                                                                                                                           | 7.25                                                          | Above 2x median |
| 204174_at       | arachidonate 5-lipoxygenase-activating protein                                                                                                                          | 6.98                                                          | Above 2x median |
| 204846_at       | ceruloplasmin (ferroxidase)                                                                                                                                             | 6.97                                                          | Above 2x median |
| 201641_at       | bone marrow stromal cell antigen 2                                                                                                                                      | 6.79                                                          | Above 2x median |
| 205081_at       | cysteine-rich protein 1 (intestinal)                                                                                                                                    | 6.56                                                          | Above 2x median |
| 209392_at       | ectonucleotide pyrophosphatase/phosphodiesterase 2 (autotaxin)                                                                                                          | 6.38                                                          | Above 2x median |
| 203854_at       | I factor (complement)                                                                                                                                                   | 6.25                                                          | Above 2x median |
| 212588_at       | protein tyrosine phosphatase, receptor type, C                                                                                                                          | 5.87                                                          | Above 2x median |
| 203758_at       | cathepsin O                                                                                                                                                             | 5.70                                                          | Above 2x median |
| 209568_s_at     | ral guanine nucleotide dissociation stimulator-like 1                                                                                                                   | 5.62                                                          | Above 2x median |
| 208885_at       | lymphocyte cytosolic protein 1 (L-plastin)                                                                                                                              | 5.51                                                          | Above 2x median |
| 219666_at       | membrane-spanning 4-domains, subfamily A, member 6A                                                                                                                     | 5.37                                                          | Above 2x median |
| 202086_at       | myxovirus (influenza virus) resistance 1, interferon-inducible protein p78 (mouse) ; myxovirus (influenza virus) resistance 1, interferon-inducible protein p78 (mouse) | 5.37                                                          | Above 2x median |
| 222125_s_at     | hypoxia-inducible factor prolyl 4-hydroxylase                                                                                                                           | 5.27                                                          | Above 2x median |
| 209108_at       | tetraspanin 6                                                                                                                                                           | 5.26                                                          | Above 2x median |
| 205890_s_at     | ubiquitin D                                                                                                                                                             | 5.26                                                          | Above 2x median |
| 213059_at       | cAMP responsive element binding protein 3-like 1                                                                                                                        | 5.24                                                          | Above 2x median |
| 210096_at       | cytochrome P450, family 4, subfamily B, polypeptide 1                                                                                                                   | 5.22                                                          | Above 2x median |
| 203824_at       | tetraspanin 8                                                                                                                                                           | 5.13                                                          | Above 2x median |
| 203915_at       | chemokine (C-X-C motif) ligand 9                                                                                                                                        | 4.75                                                          | Above 2x median |
| 212353_at       | sulfatase 1                                                                                                                                                             | 4.58                                                          | Above 2x median |
| 218454_at       | hypothetical protein FLJ22662                                                                                                                                           | 4.53                                                          | Above 2x median |
| 204646_at       | dihydropyrimidine dehydrogenase                                                                                                                                         | 4.51                                                          | Above 2x median |
| 202357_s_at     | B-factor, properdin                                                                                                                                                     | 4.41                                                          | Above 2x median |
| 205798_at       | interleukin 7 receptor                                                                                                                                                  | 4.30                                                          | Above 2x median |
| 205725_at       | secretoglobin, family 1A, member 1 (uteroglobin)                                                                                                                        | 3.95                                                          | Above 2x median |
| 203953_s_at     | claudin 3                                                                                                                                                               | 3.82                                                          | Above 2x median |
| 210272_at       | cytochrome P450, family 2, subfamily B, polypeptide 7 pseudogene 1                                                                                                      | 3.79                                                          | Above 2x median |
| 211596_s_at     | leucine-rich repeats and immunoglobulin-like domains 1                                                                                                                  | 3.74                                                          | Above 2x median |
| 204160_s_at     | ectonucleotide pyrophosphatase/phosphodiesterase 4 (putative function)                                                                                                  | 3.53                                                          | Above 2x median |
| 205313_at       | transcription factor 2, hepatic; LF-B3; variant hepatic nuclear factor                                                                                                  | 3.53                                                          | Above 2x median |

**Supplemental Gene List II. Airway Non-basal Cell Signature Genes Analyzed  
(cont. page 3)**

| <b>Probe ID</b> | <b>Gene name</b>                                                                                                                                                                | <b>Median of normalized expression levels in lung adenoCa</b> |                 |
|-----------------|---------------------------------------------------------------------------------------------------------------------------------------------------------------------------------|---------------------------------------------------------------|-----------------|
| 209355_s_at     | phosphatidic acid phosphatase type 2B                                                                                                                                           | 3.49                                                          | Above 2x median |
| 209616_s_at     | carboxylesterase 1 (monocyte/macrophage serine esterase 1)                                                                                                                      | 3.47                                                          | Above 2x median |
| 218729_at       | latexin                                                                                                                                                                         | 3.45                                                          | Above 2x median |
| 206385_s_at     | ankyrin 3, node of Ranvier (ankyrin G)                                                                                                                                          | 3.44                                                          | Above 2x median |
| 214453_s_at     | interferon-induced protein 44                                                                                                                                                   | 3.43                                                          | Above 2x median |
| 212224_at       | aldehyde dehydrogenase 1 family, member A1                                                                                                                                      | 3.42                                                          | Above 2x median |
| 211796_s_at     | T cell receptor beta variable 21-1 ; T cell receptor beta variable 19 ; T cell receptor beta variable 5-4 ; T cell receptor beta variable 3-1 ; T cell receptor beta constant 1 | 3.40                                                          | Above 2x median |
| 205831_at       | CD2 antigen (p50), sheep red blood cell receptor                                                                                                                                | 3.37                                                          | Above 2x median |
| 34210_at        | CD52 antigen (CAMPATH-1 antigen)                                                                                                                                                | 3.36                                                          | Above 2x median |
| 218901_at       | phospholipid scramblase 4                                                                                                                                                       | 3.36                                                          | Above 2x median |
| 210972_x_at     | T cell receptor alpha locus ; T cell receptor delta variable 2 ; T cell receptor alpha variable 20 ; T cell receptor alpha joining 17 ; T cell receptor alpha constant          | 3.36                                                          | Above 2x median |
| 211548_s_at     | hydroxyprostaglandin dehydrogenase 15-(NAD)                                                                                                                                     | 3.31                                                          | Above 2x median |
| 205776_at       | flavin containing monooxygenase 5                                                                                                                                               | 3.29                                                          | Above 2x median |
| 203547_at       | CD4 antigen (p55)                                                                                                                                                               | 3.24                                                          | Above 2x median |
| 205489_at       | crystallin, mu                                                                                                                                                                  | 3.23                                                          | Above 2x median |
| 205206_at       | Kallmann syndrome 1 sequence                                                                                                                                                    | 3.20                                                          | Above 2x median |
| 205597_at       | solute carrier family 44, member 4                                                                                                                                              | 3.18                                                          | Above 2x median |
| 203088_at       | fibulin 5                                                                                                                                                                       | 3.13                                                          | Above 2x median |
| 213539_at       | CD3D antigen, delta polypeptide (TiT3 complex)                                                                                                                                  | 3.09                                                          | Above 2x median |
| 207808_s_at     | protein S (alpha)                                                                                                                                                               | 3.04                                                          | Above 2x median |
| 202743_at       | phosphoinositide-3-kinase, regulatory subunit 3 (p55, gamma)                                                                                                                    | 3.03                                                          | Above 2x median |
| 221872_at       | retinoic acid receptor responder (tazarotene induced) 1                                                                                                                         | 2.97                                                          | Above 2x median |
| 209670_at       | T cell receptor alpha constant                                                                                                                                                  | 2.97                                                          | Above 2x median |
| 212148_at       | Pre-B-cell leukemia transcription factor 1                                                                                                                                      | 2.96                                                          | Above 2x median |
| 203561_at       | Fc fragment of IgG, low affinity IIa, receptor (CD32)                                                                                                                           | 2.95                                                          | Above 2x median |
| 202947_s_at     | glycophorin C (Gerbich blood group)                                                                                                                                             | 2.93                                                          | Above 2x median |
| 211742_s_at     | ecotropic viral integration site 2B                                                                                                                                             | 2.92                                                          | Above 2x median |
| 221698_s_at     | C-type lectin domain family 7, member A                                                                                                                                         | 2.90                                                          | Above 2x median |
| 209447_at       | spectrin repeat containing, nuclear envelope 1                                                                                                                                  | 2.89                                                          | Above 2x median |
| 218805_at       | GTPase, IMAP family member 5                                                                                                                                                    | 2.89                                                          | Above 2x median |
| 219014_at       | placenta-specific 8                                                                                                                                                             | 2.83                                                          | Above 2x median |
| 218885_s_at     | UDP-N-acetyl-alpha-D-galactosamine:polypeptide N-                                                                                                                               | 2.78                                                          | Above 2x median |

**Supplemental Gene List II. Airway Non-basal Cell Signature Genes Analyzed**  
(cont. page 4)

| <b>Probe ID</b> | <b>Gene name</b>                                                                                                                                                                                                 | <b>Median of normalized expression levels in lung adenoCa</b> |                 |
|-----------------|------------------------------------------------------------------------------------------------------------------------------------------------------------------------------------------------------------------|---------------------------------------------------------------|-----------------|
| 208498_s_at     | acetylgalactosaminyltransferase 12 (GalNAc-T12)<br>amylase, alpha 1A; salivary ; amylase, alpha 1B; salivary ;<br>amylase, alpha 1C; salivary ; amylase, alpha 2A;<br>pancreatic ; amylase, alpha 2B; pancreatic | 2.73                                                          | Above 2x median |
| 213566_at       | ribonuclease, RNase A family, k6                                                                                                                                                                                 | 2.58                                                          | Above 2x median |
| 203153_at       | interferon-induced protein with tetratricopeptide repeats 1 ;<br>interferon-induced protein with tetratricopeptide repeats 1                                                                                     | 2.49                                                          | Above 2x median |
| 213106_at       | ATPase, aminophospholipid transporter (APLT), Class I,<br>type 8A, member 1                                                                                                                                      | 2.44                                                          | Above 2x median |
| 202018_s_at     | lactotransferrin                                                                                                                                                                                                 | 2.42                                                          | Above 2x median |
| 205158_at       | ribonuclease, RNase A family, 4                                                                                                                                                                                  | 2.41                                                          | Above 2x median |
| 204502_at       | SAM domain and HD domain 1                                                                                                                                                                                       | 2.32                                                          | Above 2x median |
| 208146_s_at     | carboxypeptidase, vitellogenic-like ; carboxypeptidase,<br>vitellogenic-like                                                                                                                                     | 2.29                                                          | Above 2x median |
| 204774_at       | ecotropic viral integration site 2A                                                                                                                                                                              | 2.24                                                          | Above 2x median |
| 205668_at       | lymphocyte antigen 75                                                                                                                                                                                            | 2.21                                                          | Above 2x median |
| 204103_at       | chemokine (C-C motif) ligand 4                                                                                                                                                                                   | 2.19                                                          | Above 2x median |
| 204972_at       | 2'-5'-oligoadenylate synthetase 2, 69/71kDa                                                                                                                                                                      | 2.16                                                          | Above 2x median |
| 218584_at       | hypothetical protein FLJ21127                                                                                                                                                                                    | 2.16                                                          | Above 2x median |
| 205392_s_at     | chemokine (C-C motif) ligand 14 ; chemokine (C-C motif)<br>ligand 15                                                                                                                                             | 2.14                                                          | Above 2x median |
| 213733_at       | myosin IF                                                                                                                                                                                                        | 2.10                                                          | Above 2x median |
| 220330_s_at     | SAM domain, SH3 domain and nuclear localisation<br>signals, 1                                                                                                                                                    | 2.10                                                          | Above 2x median |
| 203908_at       | solute carrier family 4, sodium bicarbonate cotransporter,<br>member 4                                                                                                                                           | 2.08                                                          | Above 2x median |
| 221087_s_at     | apolipoprotein L, 3                                                                                                                                                                                              | 2.06                                                          | Above 2x median |
| 221530_s_at     | basic helix-loop-helix domain containing, class B, 3                                                                                                                                                             | 2.06                                                          | Above 2x median |
| 209539_at       | Rac/Cdc42 guanine nucleotide exchange factor (GEF) 6                                                                                                                                                             | 2.03                                                          | Above 2x median |
| 217109_at       | mucin 4, tracheobronchial                                                                                                                                                                                        | 2.02                                                          | Above 2x median |
| 214719_at       | hypothetical protein LOC283537                                                                                                                                                                                   | 2.02                                                          | Above 2x median |
| 204220_at       | glia maturation factor, gamma                                                                                                                                                                                    | 2.01                                                          | Above 2x median |
| 207222_at       | phospholipase A2, group X                                                                                                                                                                                        | 1.99                                                          |                 |
| 204576_s_at     | clusterin associated protein 1                                                                                                                                                                                   | 1.99                                                          |                 |
| 203236_s_at     | lectin, galactoside-binding, soluble, 9 (galectin 9)                                                                                                                                                             | 1.97                                                          |                 |
| 214440_at       | N-acetyltransferase 1 (arylamine N-acetyltransferase)                                                                                                                                                            | 1.94                                                          |                 |
| 208920_at       | sorcin                                                                                                                                                                                                           | 1.94                                                          |                 |
| 210166_at       | toll-like receptor 5                                                                                                                                                                                             | 1.93                                                          |                 |

**Supplemental Gene List II. Airway Non-basal Cell Signature Genes Analyzed  
(cont. page 5)**

| <b>Probe ID</b> | <b>Gene name</b>                                                                     | <b>Median of normalized expression levels in lung adenoCa</b> |
|-----------------|--------------------------------------------------------------------------------------|---------------------------------------------------------------|
| 204703_at       | tetratricopeptide repeat domain 10                                                   | 1.90                                                          |
| 213488_at       | sushi, nidogen and EGF-like domains 1                                                | 1.88                                                          |
| 205997_at       | ADAM metallopeptidase domain 28                                                      | 1.87                                                          |
| 209200_at       | MADS box transcription enhancer factor 2, polypeptide C (myocyte enhancer factor 2C) | 1.87                                                          |
| 205364_at       | acyl-Coenzyme A oxidase 2, branched chain                                            | 1.87                                                          |
| 205258_at       | inhibin, beta B (activin AB beta polypeptide)                                        | 1.87                                                          |
| 205590_at       | RAS guanyl releasing protein 1 (calcium and DAG-regulated)                           | 1.87                                                          |
| 207191_s_at     | immunoglobulin superfamily containing leucine-rich repeat                            | 1.84                                                          |
| 206932_at       | cholesterol 25-hydroxylase                                                           | 1.83                                                          |
| 209606_at       | pleckstrin homology, Sec7 and coiled-coil domains, binding protein                   | 1.81                                                          |
| 218437_s_at     | leucine zipper transcription factor-like 1                                           | 1.80                                                          |
| 204788_s_at     | protoporphyrinogen oxidase                                                           | 1.80                                                          |
| 205640_at       | aldehyde dehydrogenase 3 family, member B1                                           | 1.79                                                          |
| 205114_s_at     | chemokine (C-C motif) ligand 3 ; chemokine (C-C motif) ligand 3-like 1               | 1.79                                                          |
| 205464_at       | sodium channel, nonvoltage-gated 1, beta (Liddle syndrome)                           | 1.78                                                          |
| 212603_at       | mitochondrial ribosomal protein S31                                                  | 1.73                                                          |
| 203523_at       | lymphocyte-specific protein 1                                                        | 1.73                                                          |
| 205692_s_at     | CD38 antigen (p45)                                                                   | 1.72                                                          |
| 205316_at       | Solute carrier family 15 (H <sup>+</sup> /peptide transporter), member 2             | 1.72                                                          |
| 203151_at       | microtubule-associated protein 1A                                                    | 1.72                                                          |
| 206991_s_at     | chemokine (C-C motif) receptor 5                                                     | 1.69                                                          |
| 211902_x_at     | T cell receptor alpha locus                                                          | 1.69                                                          |
| 203708_at       | phosphodiesterase 4B, cAMP-specific (phosphodiesterase E4 dunce homolog, Drosophila) | 1.69                                                          |
| 218599_at       | REC8-like 1 (yeast)                                                                  | 1.68                                                          |
| 211685_s_at     | neurocalcin delta                                                                    | 1.64                                                          |
| 209504_s_at     | pleckstrin homology domain containing, family B (evectins) member 1                  | 1.63                                                          |
| 206765_at       | potassium inwardly-rectifying channel, subfamily J, member 2                         | 1.63                                                          |
| 213317_at       | Chloride intracellular channel 5                                                     | 1.62                                                          |
| 221188_s_at     | cell death-inducing DFFA-like effector b                                             | 1.62                                                          |

**Supplemental Gene List II. Airway Non-basal Cell Signature Genes Analyzed  
(cont. page 6)**

| <b>Probe ID</b> | <b>Gene name</b>                                                                                                                                                                                                                                        | <b>Median of normalized expression levels in lung adenoCa</b> |
|-----------------|---------------------------------------------------------------------------------------------------------------------------------------------------------------------------------------------------------------------------------------------------------|---------------------------------------------------------------|
| 204179_at       | myoglobin                                                                                                                                                                                                                                               | 1.62                                                          |
| 52975_at        | chromosome 9 open reading frame 28                                                                                                                                                                                                                      | 1.62                                                          |
| 203413_at       | NEL-like 2 (chicken) ; NEL-like 2 (chicken)                                                                                                                                                                                                             | 1.60                                                          |
| 220173_at       | chromosome 14 open reading frame 45                                                                                                                                                                                                                     | 1.59                                                          |
| 219243_at       | GTPase, IMAP family member 4                                                                                                                                                                                                                            | 1.58                                                          |
| 204202_at       | IQ motif containing E                                                                                                                                                                                                                                   | 1.56                                                          |
| 203924_at       | glutathione S-transferase A1                                                                                                                                                                                                                            | 1.55                                                          |
| 204964_s_at     | sarcospan (Kras oncogene-associated gene)                                                                                                                                                                                                               | 1.53                                                          |
| 218999_at       | hypothetical protein FLJ11000                                                                                                                                                                                                                           | 1.51                                                          |
| 203474_at       | IQ motif containing GTPase activating protein 2                                                                                                                                                                                                         | 1.51                                                          |
| 203979_at       | cytochrome P450, family 27, subfamily A, polypeptide 1                                                                                                                                                                                                  | 1.51                                                          |
| 221558_s_at     | lymphoid enhancer-binding factor 1                                                                                                                                                                                                                      | 1.50                                                          |
| 220751_s_at     | chromosome 5 open reading frame 4                                                                                                                                                                                                                       | 1.50                                                          |
| 219602_s_at     | family with sequence similarity 38, member B                                                                                                                                                                                                            | 1.49                                                          |
| 216920_s_at     | T cell receptor gamma constant 2 ; T cell receptor gamma variable 9 ; similar to T-cell receptor gamma chain C region PT-gamma-1/2 ; similar to T-cell receptor gamma chain V region PT-gamma-1/2 precursor ; TCR gamma alternate reading frame protein | 1.48                                                          |
| 205758_at       | CD8 antigen, alpha polypeptide (p32)                                                                                                                                                                                                                    | 1.45                                                          |
| 215783_s_at     | alkaline phosphatase, liver/bone/kidney                                                                                                                                                                                                                 | 1.45                                                          |
| 211003_x_at     | transglutaminase 2 (C polypeptide, protein-glutamine-gamma-glutamyltransferase)                                                                                                                                                                         | 1.45                                                          |
| 211581_x_at     | leukocyte specific transcript 1                                                                                                                                                                                                                         | 1.44                                                          |
| 219542_at       | NIMA (never in mitosis gene a)- related kinase 11                                                                                                                                                                                                       | 1.42                                                          |
| 204304_s_at     | prominin 1                                                                                                                                                                                                                                              | 1.42                                                          |
| 218820_at       | chromosome 14 open reading frame 132                                                                                                                                                                                                                    | 1.41                                                          |
| 220072_at       | centrosome and spindle pole associated protein 1                                                                                                                                                                                                        | 1.38                                                          |
| 219478_at       | WAP four-disulfide core domain 1                                                                                                                                                                                                                        | 1.38                                                          |
| 219182_at       | carbohydrate (N-acetylglucosamine 6-O) sulfotransferase 5                                                                                                                                                                                               | 1.36                                                          |
| 203951_at       | calponin 1, basic, smooth muscle                                                                                                                                                                                                                        | 1.34                                                          |
| 212415_at       | septin 6                                                                                                                                                                                                                                                | 1.33                                                          |
| 203687_at       | chemokine (C-X3-C motif) ligand 1                                                                                                                                                                                                                       | 1.33                                                          |
| 205894_at       | arylsulfatase E (chondrodysplasia punctata 1)                                                                                                                                                                                                           | 1.33                                                          |
| 213186_at       | zinc finger DAZ interacting protein 3                                                                                                                                                                                                                   | 1.32                                                          |
| 220306_at       | family with sequence similarity 46, member C                                                                                                                                                                                                            | 1.32                                                          |
| 222304_x_at     | olfactory receptor, family 7, subfamily E, member 47 pseudogene                                                                                                                                                                                         | 1.31                                                          |



**Supplemental Gene List II. Airway Non-basal Cell Signature Genes Analyzed  
(cont. page 7)**

| <b>Probe ID</b> | <b>Gene name</b>                                                                                                                                            | <b>Median of normalized expression levels in lung adenoCa</b> |
|-----------------|-------------------------------------------------------------------------------------------------------------------------------------------------------------|---------------------------------------------------------------|
| 38241_at        | butyrophilin, subfamily 3, member A3                                                                                                                        | 1.31                                                          |
| 205141_at       | angiogenin, ribonuclease, RNase A family, 5 ;<br>ribonuclease, RNase A family, 4                                                                            | 1.30                                                          |
| 214745_at       | phospholipase C-like 3                                                                                                                                      | 1.30                                                          |
| 213416_at       | integrin, alpha 4 (antigen CD49D, alpha 4 subunit of VLA-4 receptor)                                                                                        | 1.29                                                          |
| 204041_at       | monoamine oxidase B                                                                                                                                         | 1.27                                                          |
| 220108_at       | guanine nucleotide binding protein (G protein), alpha 14                                                                                                    | 1.25                                                          |
| 219799_s_at     | dehydrogenase/reductase (SDR family) member 9                                                                                                               | 1.25                                                          |
| 203680_at       | protein kinase, cAMP-dependent, regulatory, type II, beta                                                                                                   | 1.25                                                          |
| 211471_s_at     | RAB36, member RAS oncogene family                                                                                                                           | 1.24                                                          |
| 213784_at       | RAB, member of RAS oncogene family-like 4                                                                                                                   | 1.24                                                          |
| 204783_at       | Myeloid leukemia factor 1                                                                                                                                   | 1.22                                                          |
| 218218_at       | DIP13 beta                                                                                                                                                  | 1.22                                                          |
| 218789_s_at     | hypothetical protein FLJ20010                                                                                                                               | 1.20                                                          |
| 213432_at       | mucin 5, subtype B, tracheobronchial                                                                                                                        | 1.20                                                          |
| 220998_s_at     | unc-93 homolog B1 (C. elegans) ; unc-93 homolog B1 (C. elegans)                                                                                             | 1.20                                                          |
| 212805_at       | KIAA0367                                                                                                                                                    | 1.20                                                          |
| 205406_s_at     | sperm autoantigenic protein 17                                                                                                                              | 1.19                                                          |
| 203716_s_at     | dipeptidylpeptidase 4 (CD26, adenosine deaminase complexing protein 2)                                                                                      | 1.18                                                          |
| 205328_at       | claudin 10                                                                                                                                                  | 1.18                                                          |
| 205488_at       | granzyme A (granzyme 1, cytotoxic T-lymphocyte-associated serine esterase 3) ; granzyme A (granzyme 1, cytotoxic T-lymphocyte-associated serine esterase 3) | 1.17                                                          |
| 213429_at       | CDNA FLJ26539 fis, clone KDN09310                                                                                                                           | 1.17                                                          |
| 207069_s_at     | SMAD, mothers against DPP homolog 6 (Drosophila)                                                                                                            | 1.17                                                          |
| 212613_at       | butyrophilin, subfamily 3, member A2                                                                                                                        | 1.16                                                          |
| 203632_s_at     | G protein-coupled receptor, family C, group 5, member B                                                                                                     | 1.16                                                          |
| 205698_s_at     | mitogen-activated protein kinase kinase 6                                                                                                                   | 1.15                                                          |
| 215559_at       | ATP-binding cassette, sub-family C (CFTR/MRP), member 6                                                                                                     | 1.15                                                          |
| 220393_at       | glutamate-ammonia ligase (glutamine synthetase) domain containing 1                                                                                         | 1.14                                                          |
| 221879_at       | calmodulin-like 4                                                                                                                                           | 1.14                                                          |
| 205821_at       | killer cell lectin-like receptor subfamily K, member 1                                                                                                      | 1.13                                                          |
| 205269_at       | lymphocyte cytosolic protein 2 (SH2 domain containing leukocyte protein of 76kDa)                                                                           | 1.12                                                          |

**Supplemental Gene List II. Airway Non-basal Cell Signature Genes Analyzed  
(cont. page 8)**

| <b>Probe ID</b> | <b>Gene name</b>                                                                        | <b>Median of normalized expression levels in lung adenoCa</b> |
|-----------------|-----------------------------------------------------------------------------------------|---------------------------------------------------------------|
| 219279_at       | dedicator of cytokinesis 10                                                             | 1.10                                                          |
| 219543_at       | MAWD binding protein                                                                    | 1.10                                                          |
| 219777_at       | GTPase, IMAP family member 6                                                            | 1.09                                                          |
| 209869_at       | adrenergic, alpha-2A-, receptor ; adrenergic, alpha-2A-, receptor                       | 1.08                                                          |
| 219684_at       | 28kD interferon responsive protein                                                      | 1.06                                                          |
| 209737_at       | membrane associated guanylate kinase, WW and PDZ domain containing 2                    | 1.06                                                          |
| 212980_at       | Ubiquitin specific peptidase 34                                                         | 1.05                                                          |
| 205384_at       | FXYP domain containing ion transport regulator 1 (phospholemman)                        | 1.05                                                          |
| 207651_at       | G protein-coupled receptor 171                                                          | 1.05                                                          |
| 205130_at       | renal tumor antigen                                                                     | 1.04                                                          |
| 221241_s_at     | BCL2-like 14 (apoptosis facilitator)                                                    | 1.04                                                          |
| 219734_at       | SID1 transmembrane family, member 1                                                     | 1.04                                                          |
| 212686_at       | protein phosphatase 1H (PP2C domain containing)                                         | 1.03                                                          |
| 212886_at       | DKFZP434C171 protein                                                                    | 1.02                                                          |
| 219870_at       | activating transcription factor 7 interacting protein 2                                 | 1.01                                                          |
| 218272_at       | hypothetical protein FLJ20699                                                           | 1.01                                                          |
| 221187_s_at     | hypothetical protein FLJ22688                                                           | 0.99                                                          |
| 207330_at       | pregnancy-zone protein                                                                  | 0.98                                                          |
| 206315_at       | cytokine receptor-like factor 1                                                         | 0.97                                                          |
| 206540_at       | galactosidase, beta 1-like                                                              | 0.97                                                          |
| 213385_at       | Chimerin (chimaerin) 2                                                                  | 0.97                                                          |
| 206197_at       | non-metastatic cells 5, protein expressed in (nucleoside-diphosphate kinase)            | 0.97                                                          |
| 213761_at       | Mdm4, transformed 3T3 cell double minute 1, p53 binding protein (mouse)                 | 0.97                                                          |
| 204890_s_at     | lymphocyte-specific protein tyrosine kinase                                             | 0.96                                                          |
| 220500_s_at     | RAB, member of RAS oncogene family-like 2B ; RAB, member of RAS oncogene family-like 2A | 0.96                                                          |
| 213228_at       | phosphodiesterase 8B                                                                    | 0.96                                                          |
| 57540_at        | ribokinase                                                                              | 0.96                                                          |
| 207522_s_at     | ATPase, Ca <sup>++</sup> transporting, ubiquitous                                       | 0.93                                                          |
| 218532_s_at     | hypothetical protein FLJ20152                                                           | 0.93                                                          |
| 212336_at       | erythrocyte membrane protein band 4.1-like 1                                            | 0.92                                                          |
| 207490_at       | tubulin, alpha 4                                                                        | 0.92                                                          |
| 204591_at       | cell adhesion molecule with homology to L1CAM (close                                    | 0.91                                                          |

**Supplemental Gene List II. Airway Non-basal Cell Signature Genes Analyzed**  
(cont. page 9)

| <b>Probe ID</b> | <b>Gene name</b>                                                 | <b>Median of normalized expression levels in lung adenoCa</b> |
|-----------------|------------------------------------------------------------------|---------------------------------------------------------------|
|                 | homolog of L1)                                                   |                                                               |
| 214467_at       | G protein-coupled receptor 65                                    | 0.89                                                          |
| 219396_s_at     | nei endonuclease VIII-like 1 (E. coli)                           | 0.88                                                          |
| 213888_s_at     | TRAF3 interacting protein 3                                      | 0.87                                                          |
| 215239_x_at     | zinc finger protein 273                                          | 0.87                                                          |
| 220177_s_at     | transmembrane protease, serine 3                                 | 0.86                                                          |
| 204798_at       | v-myb myeloblastosis viral oncogene homolog (avian)              | 0.86                                                          |
| 219687_at       | hedgehog acyltransferase                                         | 0.86                                                          |
| 205381_at       | leucine rich repeat containing 17                                | 0.85                                                          |
| 209460_at       | 4-aminobutyrate aminotransferase                                 | 0.85                                                          |
| 206496_at       | flavin containing monooxygenase 3                                | 0.85                                                          |
| 213839_at       | KIAA0500 protein                                                 | 0.85                                                          |
| 204187_at       | guanosine monophosphate reductase                                | 0.84                                                          |
| 221185_s_at     | IQ motif containing G                                            | 0.83                                                          |
| 214053_at       | V-erb-a erythroblastic leukemia viral oncogene homolog 4 (avian) | 0.83                                                          |
| 209167_at       | glycoprotein M6B                                                 | 0.82                                                          |
| 219860_at       | lymphocyte antigen 6 complex, locus G5C                          | 0.81                                                          |
| 219469_at       | dynein, cytoplasmic, heavy polypeptide 2                         | 0.80                                                          |
| 205898_at       | chemokine (C-X3-C motif) receptor 1                              | 0.80                                                          |
| 219584_at       | phospholipase A1 member A                                        | 0.79                                                          |
| 205906_at       | forkhead box J1                                                  | 0.78                                                          |
| 210176_at       | toll-like receptor 1                                             | 0.76                                                          |
| 213661_at       | regeneration associated muscle protease                          | 0.76                                                          |
| 207996_s_at     | chromosome 18 open reading frame 1                               | 0.75                                                          |
| 205769_at       | solute carrier family 27 (fatty acid transporter), member 2      | 0.75                                                          |
| 204529_s_at     | thymus high mobility group box protein TOX                       | 0.74                                                          |
| 206076_at       | B7 gene                                                          | 0.74                                                          |
| 210129_s_at     | tubulin tyrosine ligase-like family, member 3                    | 0.73                                                          |
| 213412_at       | tight junction protein 3 (zona occludens 3)                      | 0.72                                                          |
| 205673_s_at     | ankyrin repeat and SOCS box-containing 9                         | 0.72                                                          |
| 206274_s_at     | ciliary rootlet coiled-coil, rootletin                           | 0.70                                                          |
| 205896_at       | solute carrier family 22 (organic cation transporter), member 4  | 0.70                                                          |
| 204802_at       | Ras-related associated with diabetes                             | 0.69                                                          |
| 220441_at       | hypothetical protein FLJ13236                                    | 0.69                                                          |
| 213248_at       | hypothetical protein LOC221362                                   | 0.68                                                          |
| 207795_s_at     | killer cell lectin-like receptor subfamily D, member 1           | 0.68                                                          |

**Supplemental Gene List II. Airway Non-basal Cell Signature Genes Analyzed**  
(cont. page 10)

| <b>Probe ID</b> | <b>Gene name</b>                                                       | <b>Median of normalized expression levels in lung adenoCa</b> |
|-----------------|------------------------------------------------------------------------|---------------------------------------------------------------|
| 204754_at       | Hepatic leukemia factor                                                | 0.67                                                          |
| 202652_at       | amyloid beta (A4) precursor protein-binding, family B, member 1 (Fe65) | 0.67                                                          |
| 213996_at       | yippee-like 1 (Drosophila)                                             | 0.67                                                          |
| 216356_x_at     | BAI1-associated protein 3                                              | 0.67                                                          |
| 213601_at       | slit homolog 1 (Drosophila)                                            | 0.66                                                          |
| 205839_s_at     | benzodiazapine receptor (peripheral) associated protein 1              | 0.66                                                          |
| 211855_s_at     | solute carrier family 25 (mitochondrial carrier, brain), member 14     | 0.66                                                          |
| 206483_at       | leucine rich repeat containing 6                                       | 0.65                                                          |
| 209829_at       | chromosome 6 open reading frame 32                                     | 0.64                                                          |
| 219389_at       | sushi domain containing 4                                              | 0.64                                                          |
| 222220_s_at     | translin-associated factor X interacting protein 1                     | 0.64                                                          |
| 212745_s_at     | Bardet-Biedl syndrome 4                                                | 0.64                                                          |
| 214076_at       | Hypothetical protein MGC11335                                          | 0.64                                                          |
| 218876_at       | brain specific protein ; brain specific protein                        | 0.63                                                          |
| 216119_s_at     | chromosome 20 open reading frame 28                                    | 0.63                                                          |
| 219313_at       | hypothetical protein DKFZp434C0328                                     | 0.63                                                          |
| 213512_at       | chromosome 14 open reading frame 79                                    | 0.62                                                          |
| 220024_s_at     | periaxin                                                               | 0.61                                                          |
| 222291_at       | DKFZP564J102 protein                                                   | 0.61                                                          |
| 220005_at       | purinergic receptor P2Y, G-protein coupled, 13                         | 0.61                                                          |
| 210044_s_at     | lymphoblastic leukemia derived sequence 1                              | 0.61                                                          |
| 206631_at       | prostaglandin E receptor 2 (subtype EP2), 53kDa                        | 0.60                                                          |
| 209880_s_at     | selectin P ligand                                                      | 0.60                                                          |
| 211734_s_at     | Fc fragment of IgE, high affinity I, receptor for; alpha polypeptide   | 0.60                                                          |
| 49049_at        | deltex 3 homolog (Drosophila)                                          | 0.58                                                          |
| 210641_at       | calpain 9                                                              | 0.58                                                          |
| 207624_s_at     | retinitis pigmentosa GTPase regulator                                  | 0.58                                                          |
| 205073_at       | cytochrome P450, family 2, subfamily J, polypeptide 2                  | 0.57                                                          |
| 203485_at       | reticulon 1                                                            | 0.57                                                          |
| 212695_at       | cryptochrome 2 (photolyase-like)                                       | 0.57                                                          |
| 219951_s_at     | chromosome 20 open reading frame 12                                    | 0.57                                                          |
| 219753_at       | stromal antigen 3                                                      | 0.56                                                          |
| 206693_at       | interleukin 7                                                          | 0.56                                                          |
| 208530_s_at     | retinoic acid receptor, beta                                           | 0.56                                                          |
| 205208_at       | aldehyde dehydrogenase 1 family, member L1                             | 0.56                                                          |

**Supplemental Gene List II. Airway Non-basal Cell Signature Genes Analyzed**  
(cont. page 11)

| <b>Probe ID</b> | <b>Gene name</b>                                                                                   | <b>Median of normalized expression levels in lung adenoCa</b> |                   |
|-----------------|----------------------------------------------------------------------------------------------------|---------------------------------------------------------------|-------------------|
| 207704_s_at     | growth arrest-specific 7                                                                           | 0.56                                                          |                   |
| 208396_s_at     | phosphodiesterase 1A, calmodulin-dependent                                                         | 0.55                                                          |                   |
| 219370_at       | reprimo, TP53 dependant G2 arrest mediator candidate                                               | 0.54                                                          |                   |
| 220622_at       | leucine rich repeat containing 31                                                                  | 0.53                                                          |                   |
| 221928_at       | acetyl-Coenzyme A carboxylase beta                                                                 | 0.53                                                          |                   |
| 216663_s_at     | zinc finger, MYND-type containing 10                                                               | 0.52                                                          |                   |
| 210033_s_at     | sperm associated antigen 6                                                                         | 0.52                                                          |                   |
| 212935_at       | MCF.2 cell line derived transforming sequence-like                                                 | 0.52                                                          |                   |
| 208518_s_at     | period homolog 2 (Drosophila)                                                                      | 0.51                                                          |                   |
| 204378_at       | breast carcinoma amplified sequence 1                                                              | 0.51                                                          |                   |
| 219670_at       | chromosome 1 open reading frame 165                                                                | 0.51                                                          |                   |
| 219820_at       | solute carrier family 6, member 16                                                                 | 0.51                                                          |                   |
| 204792_s_at     | WD and tetratricopeptide repeats 2                                                                 | 0.51                                                          |                   |
| 204364_s_at     | chromosome 2 open reading frame 23                                                                 | 0.51                                                          |                   |
| 216807_at       | KIAA1751                                                                                           | 0.50                                                          |                   |
| 214032_at       | zeta-chain (TCR) associated protein kinase 70kDa                                                   | 0.50                                                          |                   |
| 209074_s_at     | TU3A protein                                                                                       | 0.50                                                          |                   |
| 205043_at       | cystic fibrosis transmembrane conductance regulator, ATP-binding cassette (sub-family C, member 7) | 0.50                                                          |                   |
| 41577_at        | protein phosphatase 1, regulatory (inhibitor) subunit 16B                                          | 0.49                                                          | Below 0.5x median |
| 219703_at       | meiosis-specific nuclear structural 1                                                              | 0.47                                                          | Below 0.5x median |
| 221122_at       | HRAS-like suppressor 2                                                                             | 0.47                                                          | Below 0.5x median |
| 215695_s_at     | glycogenin 2                                                                                       | 0.47                                                          | Below 0.5x median |
| 205969_at       | arylamide deacetylase (esterase)                                                                   | 0.47                                                          | Below 0.5x median |
| 206004_at       | transglutaminase 3 (E polypeptide, protein-glutamine-gamma-glutamyltransferase)                    | 0.45                                                          | Below 0.5x median |
| 201283_s_at     | OGT(O-Glc-NAc transferase)-interacting protein 106 KDa                                             | 0.45                                                          | Below 0.5x median |
| 214222_at       | dynein, axonemal, heavy polypeptide 7                                                              | 0.45                                                          | Below 0.5x median |
| 210505_at       | alcohol dehydrogenase 7 (class IV), mu or sigma polypeptide                                        | 0.44                                                          | Below 0.5x median |
| 220197_at       | ATPase, H+ transporting, lysosomal V0 subunit a isoform 4                                          | 0.44                                                          | Below 0.5x median |
| 215363_x_at     | folate hydrolase (prostate-specific membrane antigen) 1                                            | 0.44                                                          | Below 0.5x median |
| 221107_at       | cholinergic receptor, nicotinic, alpha polypeptide 9                                               | 0.43                                                          | Below 0.5x median |
| 220003_at       | leucine rich repeat containing 36                                                                  | 0.43                                                          | Below 0.5x median |
| 206336_at       | chemokine (C-X-C motif) ligand 6 (granulocyte chemotactic protein 2)                               | 0.43                                                          | Below 0.5x median |
| 219824_at       | solute carrier family 13 (sodium/sulfate symporters),                                              | 0.43                                                          | Below 0.5x median |

**Supplemental Gene List II. Airway Non-basal Cell Signature Genes Analyzed**  
(cont. page 12)

| <b>Probe ID</b> | <b>Gene name</b>                                                                                     | <b>Median of normalized expression levels in lung adenoCa</b> |                   |
|-----------------|------------------------------------------------------------------------------------------------------|---------------------------------------------------------------|-------------------|
|                 | member 4                                                                                             |                                                               |                   |
| 220581_at       | chromosome 6 open reading frame 97                                                                   | 0.43                                                          | Below 0.5x median |
| 213438_at       | neurofascin                                                                                          | 0.43                                                          | Below 0.5x median |
| 209828_s_at     | interleukin 16 (lymphocyte chemoattractant factor)                                                   | 0.43                                                          | Below 0.5x median |
| 213679_at       | hypothetical protein FLJ13946                                                                        | 0.42                                                          | Below 0.5x median |
| 219695_at       | sphingomyelin phosphodiesterase 3, neutral membrane (neutral sphingomyelinase II)                    | 0.42                                                          | Below 0.5x median |
| 206078_at       | kalirin, RhoGEF kinase                                                                               | 0.41                                                          | Below 0.5x median |
| 205979_at       | secretoglobin, family 2A, member 1                                                                   | 0.40                                                          | Below 0.5x median |
| 210323_at       | tektin 2 (testicular)                                                                                | 0.40                                                          | Below 0.5x median |
| 219455_at       | hypothetical protein FLJ21062                                                                        | 0.40                                                          | Below 0.5x median |
| 215266_at       | dynein, axonemal, heavy polypeptide 3                                                                | 0.40                                                          | Below 0.5x median |
| 205662_at       | B9 protein                                                                                           | 0.40                                                          | Below 0.5x median |
| 219115_s_at     | interleukin 20 receptor, alpha                                                                       | 0.39                                                          | Below 0.5x median |
| 220107_s_at     | chromosome 14 open reading frame 140                                                                 | 0.39                                                          | Below 0.5x median |
| 205243_at       | solute carrier family 13 (sodium-dependent dicarboxylate transporter), member 3                      | 0.39                                                          | Below 0.5x median |
| 206938_at       | steroid-5-alpha-reductase, alpha polypeptide 2 (3-oxo-5 alpha-steroid delta 4-dehydrogenase alpha 2) | 0.39                                                          | Below 0.5x median |
| 219768_at       | V-set domain containing T cell activation inhibitor 1                                                | 0.39                                                          | Below 0.5x median |
| 209789_at       | coronin, actin binding protein, 2B                                                                   | 0.38                                                          | Below 0.5x median |
| 208109_s_at     | chromosome 15 open reading frame 5                                                                   | 0.38                                                          | Below 0.5x median |
| 220059_at       | BCR downstream signaling 1                                                                           | 0.38                                                          | Below 0.5x median |
| 205848_at       | growth arrest-specific 2                                                                             | 0.38                                                          | Below 0.5x median |
| 220908_at       | hypothetical protein FLJ32855                                                                        | 0.37                                                          | Below 0.5x median |
| 217016_x_at     | hypothetical LOC389177                                                                               | 0.37                                                          | Below 0.5x median |
| 220958_at       | unc-51-like kinase 4 (C. elegans)                                                                    | 0.37                                                          | Below 0.5x median |
| 214551_s_at     | CD7 antigen (p41)                                                                                    | 0.37                                                          | Below 0.5x median |
| 214261_s_at     | alcohol dehydrogenase 6 (class V)                                                                    | 0.37                                                          | Below 0.5x median |
| 217245_at       | early lymphoid activation protein                                                                    | 0.36                                                          | Below 0.5x median |
| 207902_at       | interleukin 5 receptor, alpha                                                                        | 0.36                                                          | Below 0.5x median |
| 220390_at       | ATP/GTP binding protein-like 2                                                                       | 0.36                                                          | Below 0.5x median |
| 220636_at       | dynein, axonemal, intermediate polypeptide 2                                                         | 0.36                                                          | Below 0.5x median |
| 221173_at       | Usher syndrome 1C (autosomal recessive, severe)                                                      | 0.36                                                          | Below 0.5x median |
| 219136_s_at     | hypothetical protein FLJ12681                                                                        | 0.35                                                          | Below 0.5x median |
| 210409_at       | chromosome 6 open reading frame 124                                                                  | 0.35                                                          | Below 0.5x median |
| 219743_at       | hairy/enhancer-of-split related with YRPW motif 2                                                    | 0.34                                                          | Below 0.5x median |
| 220416_at       | ATPase, Class I, type 8B, member 4                                                                   | 0.34                                                          | Below 0.5x median |

**Supplemental Gene List II. Airway Non-basal Cell Signature Genes Analyzed**  
(cont. page 13)

| <b>Probe ID</b> | <b>Gene name</b>                                                                                                                                                     | <b>Median of normalized expression levels in lung adenoCa</b> |                   |
|-----------------|----------------------------------------------------------------------------------------------------------------------------------------------------------------------|---------------------------------------------------------------|-------------------|
| 219882_at       | tubulin tyrosine ligase-like family, member 7                                                                                                                        | 0.34                                                          | Below 0.5x median |
| 205844_at       | vanin 1                                                                                                                                                              | 0.34                                                          | Below 0.5x median |
| 206424_at       | cytochrome P450, family 26, subfamily A, polypeptide 1                                                                                                               | 0.33                                                          | Below 0.5x median |
| 207636_at       | serpin peptidase inhibitor, clade I (pancpin), member 2                                                                                                              | 0.33                                                          | Below 0.5x median |
| 210693_at       | signal peptide peptidase-like 2B                                                                                                                                     | 0.33                                                          | Below 0.5x median |
| 220312_at       | family with sequence similarity 83, member E                                                                                                                         | 0.32                                                          | Below 0.5x median |
| 209368_at       | epoxide hydrolase 2, cytoplasmic                                                                                                                                     | 0.32                                                          | Below 0.5x median |
| 213959_s_at     | KIAA1005 protein                                                                                                                                                     | 0.32                                                          | Below 0.5x median |
| 207981_s_at     | estrogen-related receptor gamma                                                                                                                                      | 0.31                                                          | Below 0.5x median |
| 210742_at       | CDC14 cell division cycle 14 homolog A ( <i>S. cerevisiae</i> )                                                                                                      | 0.31                                                          | Below 0.5x median |
| 220331_at       | cytochrome P450, family 46, subfamily A, polypeptide 1                                                                                                               | 0.31                                                          | Below 0.5x median |
| 47553_at        | deafness, autosomal recessive 31                                                                                                                                     | 0.31                                                          | Below 0.5x median |
| 206773_at       | lymphocyte antigen 6 complex, locus H                                                                                                                                | 0.30                                                          | Below 0.5x median |
| 204796_at       | echinoderm microtubule associated protein like 1                                                                                                                     | 0.30                                                          | Below 0.5x median |
| 219871_at       | hypothetical protein FLJ13197                                                                                                                                        | 0.30                                                          | Below 0.5x median |
| 221161_at       | achaete-scute complex ( <i>Drosophila</i> ) homolog-like 3                                                                                                           | 0.30                                                          | Below 0.5x median |
| 205623_at       | aldehyde dehydrogenase 3 family, memberA1                                                                                                                            | 0.30                                                          | Below 0.5x median |
| 220196_at       | mucin 16                                                                                                                                                             | 0.30                                                          | Below 0.5x median |
| 207772_s_at     | HMT1 hnRNP methyltransferase-like 4 ( <i>S. cerevisiae</i> )                                                                                                         | 0.30                                                          | Below 0.5x median |
| 214598_at       | claudin 8                                                                                                                                                            | 0.30                                                          | Below 0.5x median |
| 205922_at       | vanin 2                                                                                                                                                              | 0.29                                                          | Below 0.5x median |
| 206556_at       | clusterin-like 1 (retinal)                                                                                                                                           | 0.29                                                          | Below 0.5x median |
| 219857_at       | chromosome 10 open reading frame 81                                                                                                                                  | 0.29                                                          | Below 0.5x median |
| 37547_at        | parathyroid hormone-responsive B1                                                                                                                                    | 0.28                                                          | Below 0.5x median |
| 205744_at       | double C2-like domains, alpha                                                                                                                                        | 0.28                                                          | Below 0.5x median |
| 206005_s_at     | chromosome 6 open reading frame 84                                                                                                                                   | 0.28                                                          | Below 0.5x median |
| 209693_at       | astrotactin 2                                                                                                                                                        | 0.28                                                          | Below 0.5x median |
| 219587_at       | tetratricopeptide repeat domain 12                                                                                                                                   | 0.28                                                          | Below 0.5x median |
| 208597_at       | ciliary neurotrophic factor                                                                                                                                          | 0.28                                                          | Below 0.5x median |
| 205921_s_at     | solute carrier family 6 (neurotransmitter transporter, taurine), member 6                                                                                            | 0.27                                                          | Below 0.5x median |
| 205795_at       | neurexin 3                                                                                                                                                           | 0.27                                                          | Below 0.5x median |
| 206457_s_at     | deiodinase, iodothyronine, type I                                                                                                                                    | 0.27                                                          | Below 0.5x median |
| 206262_at       | alcohol dehydrogenase 1A (class I), alpha polypeptide ; alcohol dehydrogenase 1B (class I), beta polypeptide ; alcohol dehydrogenase 1C (class I), gamma polypeptide | 0.27                                                          | Below 0.5x median |
| 219564_at       | potassium inwardly-rectifying channel, subfamily J, member 16                                                                                                        | 0.26                                                          | Below 0.5x median |

**Supplemental Gene List II. Airway Non-basal Cell Signature Genes Analyzed**  
(cont. page 14)

| <b>Probe ID</b> | <b>Gene name</b>                                                                                                        | <b>Median of normalized expression levels in lung adenoCa</b> |                   |
|-----------------|-------------------------------------------------------------------------------------------------------------------------|---------------------------------------------------------------|-------------------|
| 205715_at       | bone marrow stromal cell antigen 1                                                                                      | 0.26                                                          | Below 0.5x median |
| 207244_x_at     | cytochrome P450, family 2, subfamily A, polypeptide 6                                                                   | 0.25                                                          | Below 0.5x median |
| 215904_at       | myeloid/lymphoid or mixed-lineage leukemia (trithorax homolog, Drosophila); translocated to, 4                          | 0.25                                                          | Below 0.5x median |
| 215043_s_at     | SMA3 ; SMA5                                                                                                             | 0.25                                                          | Below 0.5x median |
| 219663_s_at     | hole gene                                                                                                               | 0.25                                                          | Below 0.5x median |
| 220308_at       | coiled-coil domain containing 19                                                                                        | 0.25                                                          | Below 0.5x median |
| 215143_at       | Hypothetical protein FLJ36166                                                                                           | 0.25                                                          | Below 0.5x median |
| 214204_at       | PARK2 co-regulated                                                                                                      | 0.25                                                          | Below 0.5x median |
| 222205_x_at     | Chromosome 20 open reading frame 91                                                                                     | 0.24                                                          | Below 0.5x median |
| 205473_at       | ATPase, H <sup>+</sup> transporting, lysosomal 56/58kDa, V1 subunit B, isoform 1 (Renal tubular acidosis with deafness) | 0.24                                                          | Below 0.5x median |
| 214188_at       | Hexamethylene bis-acetamide inducible 1                                                                                 | 0.24                                                          | Below 0.5x median |
| 206291_at       | neurotensin                                                                                                             | 0.24                                                          | Below 0.5x median |
| 206318_at       | serine peptidase inhibitor-like, with Kunitz and WAP domains 1 (eppin)                                                  | 0.24                                                          | Below 0.5x median |
| 220321_s_at     | hypothetical protein FLJ13646                                                                                           | 0.24                                                          | Below 0.5x median |
| 219766_at       | hypothetical protein MGC4093                                                                                            | 0.23                                                          | Below 0.5x median |
| 206541_at       | kallikrein B, plasma (Fletcher factor) 1                                                                                | 0.23                                                          | Below 0.5x median |
| 205031_at       | ephrin-B3                                                                                                               | 0.23                                                          | Below 0.5x median |
| 220389_at       | hypothetical protein FLJ23514                                                                                           | 0.23                                                          | Below 0.5x median |
| 216103_at       | acyl-CoA thioesterase 11                                                                                                | 0.23                                                          | Below 0.5x median |
| 204557_s_at     | DAZ interacting protein 1                                                                                               | 0.22                                                          | Below 0.5x median |
| 210082_at       | ATP-binding cassette, sub-family A (ABC1), member 4                                                                     | 0.22                                                          | Below 0.5x median |
| 220156_at       | EF-hand calcium binding domain 1                                                                                        | 0.22                                                          | Below 0.5x median |
| 207900_at       | chemokine (C-C motif) ligand 17                                                                                         | 0.22                                                          | Below 0.5x median |
| 219965_s_at     | PDZ domain containing, X chromosome                                                                                     | 0.21                                                          | Below 0.5x median |
| 213589_s_at     | hypothetical protein LOC146712 ; UDP-GlcNAc:betaGal beta-1,3-N-acetylglucosaminyltransferase-like 1                     | 0.21                                                          | Below 0.5x median |
| 214082_at       | carbonic anhydrase VB, mitochondrial                                                                                    | 0.21                                                          | Below 0.5x median |
| 220168_at       | cancer susceptibility candidate 1                                                                                       | 0.21                                                          | Below 0.5x median |
| 207021_at       | zona pellucida binding protein                                                                                          | 0.21                                                          | Below 0.5x median |
| 222134_at       | D-aspartate oxidase                                                                                                     | 0.20                                                          | Below 0.5x median |
| 206243_at       | TIMP metalloproteinase inhibitor 4                                                                                      | 0.20                                                          | Below 0.5x median |
| 220351_at       | chemokine (C-C motif) receptor-like 1                                                                                   | 0.20                                                          | Below 0.5x median |
| 206465_at       | acyl-CoA synthetase bubblegum family member 1                                                                           | 0.20                                                          | Below 0.5x median |
| 206721_at       | chromosome 1 open reading frame 114                                                                                     | 0.20                                                          | Below 0.5x median |
| 214156_at       | myosin VIIA and Rab interacting protein                                                                                 | 0.20                                                          | Below 0.5x median |



**Supplemental Gene List II. Airway Non-basal Cell Signature Genes Analyzed**  
(cont. page 15)

| <b>Probe ID</b> | <b>Gene name</b>                                                    | <b>Median of normalized expression levels in lung adenoCa</b> |                   |
|-----------------|---------------------------------------------------------------------|---------------------------------------------------------------|-------------------|
| 210390_s_at     | chemokine (C-C motif) ligand 15                                     | 0.19                                                          | Below 0.5x median |
| 206480_at       | leukotriene C4 synthase                                             | 0.19                                                          | Below 0.5x median |
| 220125_at       | dynein, axonemal, intermediate polypeptide 1                        | 0.19                                                          | Below 0.5x median |
| 222068_s_at     | leucine rich repeat containing 50                                   | 0.19                                                          | Below 0.5x median |
| 205675_at       | microsomal triglyceride transfer protein (large polypeptide, 88kDa) | 0.19                                                          | Below 0.5x median |
| 210073_at       | ST8 alpha-N-acetyl-neuraminide alpha-2,8-sialyltransferase 1        | 0.18                                                          | Below 0.5x median |
| 213456_at       | sclerostin domain containing 1                                      | 0.18                                                          | Below 0.5x median |
| 211303_x_at     | prostate-specific membrane antigen-like                             | 0.18                                                          | Below 0.5x median |
| 206017_at       | KIAA0319                                                            | 0.18                                                          | Below 0.5x median |
| 220302_at       | male germ cell-associated kinase                                    | 0.18                                                          | Below 0.5x median |
| 220218_at       | chromosome 9 open reading frame 68                                  | 0.18                                                          | Below 0.5x median |
| 214147_at       | chromosome 1 open reading frame 175                                 | 0.17                                                          | Below 0.5x median |
| 219511_s_at     | synuclein, alpha interacting protein (synphilin)                    | 0.17                                                          | Below 0.5x median |
| 213217_at       | adenylate cyclase 2 (brain)                                         | 0.17                                                          | Below 0.5x median |
| 214217_at       | Glutamate receptor, metabotropic 5                                  | 0.17                                                          | Below 0.5x median |
| 210262_at       | cysteine-rich secretory protein 2                                   | 0.17                                                          | Below 0.5x median |
| 205413_at       | metallophosphoesterase domain containing 2                          | 0.17                                                          | Below 0.5x median |
| 220539_at       | chromosome 10 open reading frame 92                                 | 0.16                                                          | Below 0.5x median |
| 220812_s_at     | HERV-H LTR-associating 2                                            | 0.16                                                          | Below 0.5x median |
| 221908_at       | Hypothetical protein FLJ14627                                       | 0.16                                                          | Below 0.5x median |
| 207958_at       | UDP glucuronosyltransferase 2 family, polypeptide A1                | 0.16                                                          | Below 0.5x median |
| 203995_at       | chromosome 21 open reading frame 2                                  | 0.16                                                          | Below 0.5x median |
| 207430_s_at     | microseminoprotein, beta-                                           | 0.16                                                          | Below 0.5x median |
| 220523_at       | EF-hand domain (C-terminal) containing 2                            | 0.16                                                          | Below 0.5x median |
| 220269_at       | hypothetical protein FLJ23049                                       | 0.16                                                          | Below 0.5x median |
| 213611_at       | aquaporin 5                                                         | 0.16                                                          | Below 0.5x median |
| 214608_s_at     | eyes absent homolog 1 (Drosophila)                                  | 0.16                                                          | Below 0.5x median |
| 210328_at       | glycine N-methyltransferase                                         | 0.16                                                          | Below 0.5x median |
| 215174_at       | flavin containing monooxygenase 6                                   | 0.15                                                          | Below 0.5x median |
| 205948_at       | protein tyrosine phosphatase, receptor type, T                      | 0.15                                                          | Below 0.5x median |
| 214385_s_at     | mucin 5, subtypes A and C, tracheobronchial/gastric                 | 0.15                                                          | Below 0.5x median |
| 220055_at       | zinc finger protein 287                                             | 0.14                                                          | Below 0.5x median |
| 207583_at       | ATP-binding cassette, sub-family D (ALD), member 2                  | 0.14                                                          | Below 0.5x median |
| 219578_s_at     | cytoplasmic polyadenylation element binding protein 1               | 0.14                                                          | Below 0.5x median |
| 220991_s_at     | ring finger protein 32                                              | 0.14                                                          | Below 0.5x median |
| 206755_at       | cytochrome P450, family 2, subfamily B, polypeptide 6               | 0.14                                                          | Below 0.5x median |

**Supplemental Gene List II. Airway Non-basal Cell Signature Genes Analyzed**  
(cont. page 16)

| <b>Probe ID</b> | <b>Gene name</b>                                                                      | <b>Median of normalized expression levels in lung adenoCa</b> |                   |
|-----------------|---------------------------------------------------------------------------------------|---------------------------------------------------------------|-------------------|
| 207550_at       | myeloproliferative leukemia virus oncogene                                            | 0.13                                                          | Below 0.5x median |
| 220344_at       | chromosome 11 open reading frame 16                                                   | 0.13                                                          | Below 0.5x median |
| 216135_at       | Hypothetical protein MGC35048                                                         | 0.13                                                          | Below 0.5x median |
| 214162_at       | hypothetical protein LOC284244                                                        | 0.13                                                          | Below 0.5x median |
| 221180_at       | Yeast Sps1/Ste20-related kinase 4 ( <i>S. cerevisiae</i> )                            | 0.12                                                          | Below 0.5x median |
| 205056_s_at     | G protein-coupled receptor 162                                                        | 0.12                                                          | Below 0.5x median |
| 220280_s_at     | ankyrin repeat and MYND domain containing 1                                           | 0.12                                                          | Below 0.5x median |
| 205363_at       | butyrobetaine (gamma), 2-oxoglutarate dioxygenase (gamma-butyrobetaine hydroxylase) 1 | 0.12                                                          | Below 0.5x median |
| 210445_at       | fatty acid binding protein 6, ileal (gastrotropin)                                    | 0.11                                                          | Below 0.5x median |
| 219106_s_at     | kelch repeat and BTB (POZ) domain containing 10                                       | 0.11                                                          | Below 0.5x median |
| 219614_s_at     | solute carrier family 6 (proline IMINO transporter), member 20                        | 0.11                                                          | Below 0.5x median |
| 222102_at       | glutathione S-transferase A3                                                          | 0.10                                                          | Below 0.5x median |
| 220528_at       | vanin 3                                                                               | 0.10                                                          | Below 0.5x median |
| 214818_at       | hypothetical protein LOC284001                                                        | 0.10                                                          | Below 0.5x median |
| 205044_at       | gamma-aminobutyric acid (GABA) A receptor, pi                                         | 0.10                                                          | Below 0.5x median |
| 207913_at       | cytochrome P450, family 2, subfamily F, polypeptide 1                                 | 0.10                                                          | Below 0.5x median |
| 207797_s_at     | LRP2 binding protein                                                                  | 0.10                                                          | Below 0.5x median |
| 207149_at       | cadherin 12, type 2 (N-cadherin 2)                                                    | 0.10                                                          | Below 0.5x median |
| 221863_at       | KIAA1193                                                                              | 0.09                                                          | Below 0.5x median |
| 220614_s_at     | chromosome 6 open reading frame 103                                                   | 0.09                                                          | Below 0.5x median |
| 205337_at       | dopachrome tautomerase (dopachrome delta-isomerase, tyrosine-related protein 2)       | 0.09                                                          | Below 0.5x median |
| 220361_at       | hypothetical protein FLJ12476                                                         | 0.09                                                          | Below 0.5x median |
| 205813_s_at     | methionine adenosyltransferase I, alpha                                               | 0.09                                                          | Below 0.5x median |
| 220652_at       | kinesin family member 24                                                              | 0.09                                                          | Below 0.5x median |
| 211468_s_at     | RecQ protein-like 5                                                                   | 0.09                                                          | Below 0.5x median |
| 221182_at       | chromosome 1 open reading frame 129                                                   | 0.08                                                          | Below 0.5x median |
| 214420_s_at     | Cytochrome P450, family 2, subfamily C, polypeptide 9                                 | 0.08                                                          | Below 0.5x median |
| 207344_at       | A kinase (PRKA) anchor protein 3                                                      | 0.08                                                          | Below 0.5x median |
| 222089_s_at     | hypothetical protein AF447587                                                         | 0.08                                                          | Below 0.5x median |
| 220766_at       | B-cell translocation gene 4                                                           | 0.08                                                          | Below 0.5x median |
| 208327_at       | cytochrome P450, family 2, subfamily A, polypeptide 13                                | 0.07                                                          | Below 0.5x median |
| 206810_at       | zinc finger protein 44 (KOX 7)                                                        | 0.07                                                          | Below 0.5x median |
| 220426_at       | hypothetical protein MGC5356                                                          | 0.07                                                          | Below 0.5x median |
| 214652_at       | dopamine receptor D1                                                                  | 0.07                                                          | Below 0.5x median |
| 206526_at       | RIB43A domain with coiled-coils 2                                                     | 0.06                                                          | Below 0.5x median |

**Supplemental Gene List II. Airway Non-basal Cell Signature Genes Analyzed**  
(cont. page 17)

| <b>Probe ID</b> | <b>Gene name</b>                                                                                                                | <b>Median of normalized expression levels in lung adenoCa</b> |                   |
|-----------------|---------------------------------------------------------------------------------------------------------------------------------|---------------------------------------------------------------|-------------------|
| 207896_s_at     | deleted in lung and esophageal cancer 1                                                                                         | 0.06                                                          | Below 0.5x median |
| 220756_s_at     | G protein-coupled receptor 172B                                                                                                 | 0.06                                                          | Below 0.5x median |
| 206149_at       | hepatocellular carcinoma antigen gene 520                                                                                       | 0.06                                                          | Below 0.5x median |
| 207177_at       | prostaglandin F receptor (FP)                                                                                                   | 0.06                                                          | Below 0.5x median |
| 221946_at       | chromosome 9 open reading frame 116                                                                                             | 0.06                                                          | Below 0.5x median |
| 213845_at       | GRIK2=GluR6 kainate receptor {3' untranslated region, TAA trinucleotide repeats} [human, caudate/putamen, mRNA Partial, 540 nt] | 0.06                                                          | Below 0.5x median |
| 209720_s_at     | serpin peptidase inhibitor, clade B (ovalbumin), member 3                                                                       | 0.06                                                          | Below 0.5x median |
| 216209_at       | hypothetical gene supported by AK057632; AL137270; BC057846                                                                     | 0.06                                                          | Below 0.5x median |
| 207328_at       | arachidonate 15-lipoxygenase                                                                                                    | 0.05                                                          | Below 0.5x median |
| 220064_at       | tetratricopeptide repeat domain 21B                                                                                             | 0.05                                                          | Below 0.5x median |
| 207766_at       | cyclin-dependent kinase-like 1 (CDC2-related kinase)                                                                            | 0.05                                                          | Below 0.5x median |
| 210402_at       | potassium inwardly-rectifying channel, subfamily J, member 1                                                                    | 0.05                                                          | Below 0.5x median |
| 214961_at       | KIAA0774                                                                                                                        | 0.04                                                          | Below 0.5x median |
| 215432_at       | acyl-CoA synthetase medium-chain family member 1                                                                                | 0.04                                                          | Below 0.5x median |
| 203030_s_at     | protein tyrosine phosphatase, receptor type, N polypeptide 2                                                                    | 0.04                                                          | Below 0.5x median |
| 206815_at       | sperm associated antigen 8                                                                                                      | 0.04                                                          | Below 0.5x median |
| 220105_at       | rhabdoid tumor deletion region gene 1                                                                                           | 0.03                                                          | Below 0.5x median |
| 206380_s_at     | properdin P factor, complement                                                                                                  | 0.03                                                          | Below 0.5x median |
| 207261_at       | cyclic nucleotide gated channel alpha 3                                                                                         | 0.03                                                          | Below 0.5x median |
| 205478_at       | protein phosphatase 1, regulatory (inhibitor) subunit 1A                                                                        | 0.03                                                          | Below 0.5x median |
| 206522_at       | maltase-glucoamylase (alpha-glucosidase)                                                                                        | 0.03                                                          | Below 0.5x median |

**Supplemental Gene List III. Transcriptomal Differences between Basal Cell (BC)-high  
Adenocarcinoma (adenoCa) vs BC-low AdenoCa**

| Probe ID    | Gene name                                                                | BC-high adenoCa vs BC-low adenoCa |                        |
|-------------|--------------------------------------------------------------------------|-----------------------------------|------------------------|
|             |                                                                          | Fold-change                       | p value                |
| 37892_at    | collagen, type XI, alpha 1                                               | 12.60                             | 2.37x10 <sup>-9</sup>  |
| 209125_at   | keratin 6A ; keratin 6C ; keratin 6E                                     | 8.53                              | 2.94x10 <sup>-8</sup>  |
| 204855_at   | serpin peptidase inhibitor, clade B (ovalbumin), member 5                | 7.94                              | 3.20x10 <sup>-6</sup>  |
| 204475_at   | matrix metalloproteinase 1 (interstitial collagenase)                    | 6.44                              | 1.70x10 <sup>-5</sup>  |
| 205627_at   | cytidine deaminase                                                       | 6.13                              | 9.09x10 <sup>-8</sup>  |
| 206023_at   | neuromedin U                                                             | 6.03                              | 3.58x10 <sup>-5</sup>  |
| 218469_at   | gremlin 1, cysteine knot superfamily, homolog (Xenopus laevis)           | 5.46                              | 1.47x10 <sup>-11</sup> |
| 209942_x_at | melanoma antigen family A, 3                                             | 5.15                              | 4.14x10 <sup>-3</sup>  |
| 213338_at   | Ras-induced senescence 1                                                 | 5.08                              | 3.25x10 <sup>-10</sup> |
| 205476_at   | chemokine (C-C motif) ligand 20                                          | 4.51                              | 1.08x10 <sup>-3</sup>  |
| 205403_at   | interleukin 1 receptor, type II                                          | 4.51                              | 5.20x10 <sup>-6</sup>  |
| 206561_s_at | aldo-keto reductase family 1, member B10 (aldose reductase)              | 4.50                              | 9.77x10 <sup>-4</sup>  |
| 219555_s_at | uncharacterized bone marrow protein BM039                                | 4.47                              | 5.09x10 <sup>-7</sup>  |
| 214612_x_at | melanoma antigen family A, 6                                             | 4.41                              | 6.97x10 <sup>-3</sup>  |
| 204420_at   | FOS-like antigen 1                                                       | 4.34                              | 6.57x10 <sup>-9</sup>  |
| 204641_at   | NIMA (never in mitosis gene a)-related kinase 2                          | 4.25                              | 2.84x10 <sup>-9</sup>  |
| 213711_at   | keratin, hair, basic, 1                                                  | 4.22                              | 2.56x10 <sup>-3</sup>  |
| 201890_at   | ribonucleotide reductase M2 polypeptide                                  | 4.21                              | 9.25x10 <sup>-12</sup> |
| 209825_s_at | uridine-cytidine kinase 2                                                | 4.15                              | 6.69x10 <sup>-9</sup>  |
| 211506_s_at | interleukin 8                                                            | 4.15                              | 3.66x10 <sup>-7</sup>  |
| 202855_s_at | solute carrier family 16 (monocarboxylic acid transporters), member 3    | 4.15                              | 2.03x10 <sup>-13</sup> |
| 219918_s_at | asp (abnormal spindle)-like, microcephaly associated (Drosophila)        | 4.14                              | 1.10x10 <sup>-7</sup>  |
| 213201_s_at | troponin T type 1 (skeletal, slow)                                       | 4.12                              | 1.34x10 <sup>-4</sup>  |
| 201710_at   | v-myb myeloblastosis viral oncogene homolog (avian)-like 2               | 4.08                              | 1.32x10 <sup>-9</sup>  |
| 221520_s_at | cell division cycle associated 8                                         | 3.99                              | 1.44x10 <sup>-7</sup>  |
| 201564_s_at | fascin homolog 1, actin-bundling protein (Strongylocentrotus purpuratus) | 3.92                              | 3.98x10 <sup>-9</sup>  |
| 209587_at   | paired-like homeodomain transcription factor 1                           | 3.88                              | 2.78x10 <sup>-5</sup>  |
| 206155_at   | ATP-binding cassette, sub-family C (CFTR/MRP), member 2                  | 3.79                              | 3.15x10 <sup>-4</sup>  |
| 220431_at   | transmembrane protease, serine 11E                                       | 3.76                              | 1.78x10 <sup>-4</sup>  |

**Supplemental Gene List III. Transcriptomal Differences between Basal Cell (BC)-high Adenocarcinoma (adenoCa) vs BC-low AdenoCa (cont. page 2)**

| Probe ID    | Gene name                                                              | BC-high adenoCa vs BC-low adenoCa |                        |
|-------------|------------------------------------------------------------------------|-----------------------------------|------------------------|
|             |                                                                        | Fold-change                       | p value                |
| 204162_at   | kinetochore associated 2                                               | 3.74                              | 7.34x10 <sup>-7</sup>  |
| 205874_at   | inositol 1,4,5-trisphosphate 3-kinase A                                | 3.73                              | 4.12x10 <sup>-5</sup>  |
| 213790_at   | ADAM metallopeptidase domain 12 (meltrin alpha)                        | 3.72                              | 2.87x10 <sup>-8</sup>  |
| 218542_at   | chromosome 10 open reading frame 3                                     | 3.68                              | 9.68x10 <sup>-10</sup> |
| 205490_x_at | gap junction protein, beta 3, 31kDa (connexin 31)                      | 3.67                              | 6.94x10 <sup>-6</sup>  |
| 211571_s_at | chondroitin sulfate proteoglycan 2 (versican)                          | 3.66                              | 4.21x10 <sup>-8</sup>  |
| 214603_at   | melanoma antigen family A, 2 ; melanoma antigen family A, 2B           | 3.65                              | 7.05x10 <sup>-3</sup>  |
| 202580_x_at | forkhead box M1                                                        | 3.62                              | 3.71x10 <sup>-8</sup>  |
| 204126_s_at | CDC45 cell division cycle 45-like ( <i>S. cerevisiae</i> )             | 3.62                              | 4.57x10 <sup>-5</sup>  |
| 212992_at   | chromosome 14 open reading frame 78                                    | 3.61                              | 1.26x10 <sup>-10</sup> |
| 212353_at   | sulfatase 1                                                            | 3.59                              | 3.11x10 <sup>-9</sup>  |
| 210052_s_at | TPX2, microtubule-associated, homolog ( <i>Xenopus laevis</i> )        | 3.59                              | 3.17x10 <sup>-10</sup> |
| 202870_s_at | CDC20 cell division cycle 20 homolog ( <i>S. cerevisiae</i> )          | 3.57                              | 1.38x10 <sup>-9</sup>  |
| 205959_at   | matrix metallopeptidase 13 (collagenase 3)                             | 3.57                              | 1.65x10 <sup>-3</sup>  |
| 202779_s_at | ubiquitin-conjugating enzyme E2S                                       | 3.56                              | 2.52x10 <sup>-12</sup> |
| 204351_at   | S100 calcium binding protein P                                         | 3.55                              | 7.27x10 <sup>-3</sup>  |
| 221521_s_at | DNA replication complex GINS protein PSF2                              | 3.55                              | 5.28x10 <sup>-6</sup>  |
| 203819_s_at | IGF-II mRNA-binding protein 3                                          | 3.54                              | 2.13x10 <sup>-3</sup>  |
| 204920_at   | carbamoyl-phosphate synthetase 1, mitochondrial                        | 3.54                              | 7.60x10 <sup>-4</sup>  |
| 205064_at   | small proline-rich protein 1B (cornifin)                               | 3.50                              | 4.65x10 <sup>-4</sup>  |
| 218726_at   | Holliday junction recognition protein                                  | 3.49                              | 4.36x10 <sup>-8</sup>  |
| 204825_at   | maternal embryonic leucine zipper kinase                               | 3.40                              | 1.27x10 <sup>-8</sup>  |
| 211668_s_at | plasminogen activator, urokinase                                       | 3.40                              | 2.37x10 <sup>-9</sup>  |
| 212949_at   | barren homolog ( <i>Drosophila</i> )                                   | 3.40                              | 5.64x10 <sup>-8</sup>  |
| 204952_at   | LY6/PLAUR domain containing 3                                          | 3.36                              | 5.09x10 <sup>-5</sup>  |
| 202311_s_at | collagen, type I, alpha 1                                              | 3.35                              | 3.33x10 <sup>-7</sup>  |
| 203876_s_at | matrix metallopeptidase 11 (stromelysin 3)                             | 3.34                              | 1.41x10 <sup>-5</sup>  |
| 202363_at   | sparc/osteonectin, cwcv and kazal-like domains proteoglycan (testican) | 3.33                              | 1.10x10 <sup>-7</sup>  |
| 221009_s_at | angiopoietin-like 4                                                    | 3.33                              | 1.66x10 <sup>-7</sup>  |
| 205046_at   | centromere protein E, 312kDa                                           | 3.32                              | 6.09x10 <sup>-8</sup>  |
| 219491_at   | leucine rich repeat and fibronectin type III domain containing 4       | 3.31                              | 4.06x10 <sup>-6</sup>  |
| 206504_at   | cytochrome P450, family 24, subfamily A, polypeptide 1                 | 3.30                              | 8.91x10 <sup>-4</sup>  |
| 203535_at   | S100 calcium binding protein A9 (calgranulin B)                        | 3.30                              | 4.96x10 <sup>-5</sup>  |
| 214370_at   | S100 calcium binding protein A8 (calgranulin A)                        | 3.27                              | 1.25x10 <sup>-3</sup>  |

**Supplemental Gene List III. Transcriptomal Differences between Basal Cell (BC)-high  
Adenocarcinoma (adenoCa) vs BC-low AdenoCa (cont. page 3)**

| Probe ID    | Gene name                                                                                        | BC-high adenoCa vs BC-low adenoCa |                        |
|-------------|--------------------------------------------------------------------------------------------------|-----------------------------------|------------------------|
|             |                                                                                                  | Fold-change                       | p value                |
| 220651_s_at | MCM10 minichromosome maintenance deficient 10 (S. cerevisiae)                                    | 3.27                              | 5.60x10 <sup>-7</sup>  |
| 221730_at   | collagen, type V, alpha 2                                                                        | 3.27                              | 2.03x10 <sup>-9</sup>  |
| 203362_s_at | MAD2 mitotic arrest deficient-like 1 (yeast)                                                     | 3.25                              | 4.16x10 <sup>-10</sup> |
| 201037_at   | phosphofructokinase, platelet                                                                    | 3.24                              | 9.25x10 <sup>-12</sup> |
| 209800_at   | keratin 16 (focal non-epidermolytic palmoplantar keratoderma)                                    | 3.22                              | 6.10x10 <sup>-4</sup>  |
| 202620_s_at | procollagen-lysine, 2-oxoglutarate 5-dioxygenase 2                                               | 3.21                              | 5.60x10 <sup>-11</sup> |
| 205328_at   | claudin 10                                                                                       | 3.20                              | 2.77x10 <sup>-4</sup>  |
| 204286_s_at | phorbol-12-myristate-13-acetate-induced protein 1                                                | 3.20                              | 2.14x10 <sup>-6</sup>  |
| 206025_s_at | tumor necrosis factor, alpha-induced protein 6                                                   | 3.18                              | 3.23x10 <sup>-11</sup> |
| 210643_at   | tumor necrosis factor (ligand) superfamily, member 11                                            | 3.18                              | 1.70x10 <sup>-4</sup>  |
| 219271_at   | UDP-N-acetyl-alpha-D-galactosamine:polypeptide N-acetylgalactosaminyltransferase 14 (GalNAc-T14) | 3.17                              | 7.01x10 <sup>-4</sup>  |
| 210511_s_at | inhibin, beta A (activin A, activin AB alpha polypeptide)                                        | 3.14                              | 1.14x10 <sup>-5</sup>  |
| 205542_at   | six transmembrane epithelial antigen of the prostate 1                                           | 3.09                              | 9.68x10 <sup>-10</sup> |
| 213008_at   | Fanconi anemia, complementation group I                                                          | 3.02                              | 5.74x10 <sup>-6</sup>  |
| 202828_s_at | matrix metalloproteinase 14 (membrane-inserted)                                                  | 3.00                              | 7.07x10 <sup>-6</sup>  |
| 202997_s_at | lysyl oxidase-like 2                                                                             | 3.00                              | 1.20x10 <sup>-5</sup>  |
| 201387_s_at | ubiquitin carboxyl-terminal esterase L1 (ubiquitin thiolesterase)                                | 2.99                              | 9.72x10 <sup>-6</sup>  |
| 217901_at   | Desmoglein 2                                                                                     | 2.99                              | 3.36x10 <sup>-10</sup> |
| 218663_at   | chromosome condensation protein G                                                                | 2.99                              | 1.23x10 <sup>-7</sup>  |
| 218741_at   | chromosome 22 open reading frame 18                                                              | 2.97                              | 1.21x10 <sup>-6</sup>  |
| 200606_at   | desmoplakin                                                                                      | 2.95                              | 9.91x10 <sup>-9</sup>  |
| 206549_at   | insulin-like 4 (placenta)                                                                        | 2.95                              | 1.62x10 <sup>-3</sup>  |
| 206439_at   | dermatan sulfate proteoglycan 3                                                                  | 2.95                              | 8.52x10 <sup>-4</sup>  |
| 204014_at   | dual specificity phosphatase 4                                                                   | 2.94                              | 1.80x10 <sup>-3</sup>  |
| 210074_at   | cathepsin L2                                                                                     | 2.94                              | 3.90x10 <sup>-8</sup>  |
| 205916_at   | S100 calcium binding protein A7 (psoriasin 1)                                                    | 2.91                              | 6.12x10 <sup>-3</sup>  |
| 204281_at   | TEA domain family member 4                                                                       | 2.90                              | 2.85x10 <sup>-8</sup>  |
| 219148_at   | PDZ binding kinase                                                                               | 2.88                              | 3.71x10 <sup>-7</sup>  |
| 205302_at   | insulin-like growth factor binding protein 1                                                     | 2.88                              | 5.77x10 <sup>-5</sup>  |
| 205767_at   | epiregulin                                                                                       | 2.86                              | 6.08x10 <sup>-3</sup>  |
| 202404_s_at | collagen, type I, alpha 2                                                                        | 2.84                              | 1.72x10 <sup>-8</sup>  |
| 219825_at   | cytochrome P450, family 26, subfamily B, polypeptide 1                                           | 2.83                              | 7.44x10 <sup>-6</sup>  |
| 209596_at   | matrix-remodelling associated 5                                                                  | 2.82                              | 2.28x10 <sup>-7</sup>  |
| 218355_at   | kinesin family member 4A                                                                         | 2.82                              | 7.75x10 <sup>-8</sup>  |

**Supplemental Gene List III. Transcriptomal Differences between Basal Cell (BC)-high  
Adenocarcinoma (adenoCa) vs BC-low AdenoCa (cont. page 4)**

| Probe ID    | Gene name                                                                                     | BC-high adenoCa vs BC-low adenoCa |                        |
|-------------|-----------------------------------------------------------------------------------------------|-----------------------------------|------------------------|
|             |                                                                                               | Fold-change                       | p value                |
| 213523_at   | cyclin E1                                                                                     | 2.80                              | 3.04x10 <sup>-6</sup>  |
| 218843_at   | fibronectin type III domain containing 4                                                      | 2.80                              | 2.27x10 <sup>-7</sup>  |
| 203213_at   | Cell division cycle 2, G1 to S and G2 to M                                                    | 2.80                              | 2.63x10 <sup>-8</sup>  |
| 221436_s_at | cell division cycle associated 3                                                              | 2.80                              | 5.86x10 <sup>-6</sup>  |
| 218990_s_at | small proline-rich protein 3                                                                  | 2.79                              | 1.23x10 <sup>-3</sup>  |
| 203418_at   | cyclin A2                                                                                     | 2.79                              | 5.98x10 <sup>-8</sup>  |
| 209680_s_at | kinesin family member C1                                                                      | 2.78                              | 2.46x10 <sup>-5</sup>  |
| 214710_s_at | cyclin B1                                                                                     | 2.78                              | 2.37x10 <sup>-9</sup>  |
| 201116_s_at | carboxypeptidase E                                                                            | 2.76                              | 6.65x10 <sup>-5</sup>  |
| 202627_s_at | serpin peptidase inhibitor, clade E (nexin, plasminogen activator inhibitor type 1), member 1 | 2.75                              | 1.63x10 <sup>-6</sup>  |
| 205513_at   | transcobalamin I (vitamin B12 binding protein, R binder family)                               | 2.75                              | 6.52x10 <sup>-3</sup>  |
| 204580_at   | matrix metalloproteinase 12 (macrophage elastase)                                             | 2.74                              | 4.59x10 <sup>-4</sup>  |
| 207717_s_at | plakophilin 2                                                                                 | 2.74                              | 6.69x10 <sup>-5</sup>  |
| 220658_s_at | aryl hydrocarbon receptor nuclear translocator-like 2                                         | 2.73                              | 1.29x10 <sup>-8</sup>  |
| 204602_at   | dickkopf homolog 1 ( <i>Xenopus laevis</i> )                                                  | 2.72                              | 8.76x10 <sup>-4</sup>  |
| 211844_s_at | neuropilin 2                                                                                  | 2.71                              | 5.84x10 <sup>-5</sup>  |
| 203560_at   | gamma-glutamyl hydrolase (conjugase, folic polyglutamate hydrolase)                           | 2.71                              | 3.82x10 <sup>-6</sup>  |
| 203967_at   | CDC6 cell division cycle 6 homolog ( <i>S. cerevisiae</i> )                                   | 2.71                              | 3.66x10 <sup>-7</sup>  |
| 203925_at   | glutamate-cysteine ligase, modifier subunit                                                   | 2.69                              | 1.39x10 <sup>-6</sup>  |
| 218880_at   | FOS-like antigen 2                                                                            | 2.68                              | 1.94x10 <sup>-12</sup> |
| 204962_s_at | centromere protein A, 17kDa                                                                   | 2.68                              | 1.54x10 <sup>-6</sup>  |
| 214974_x_at | chemokine (C-X-C motif) ligand 5                                                              | 2.68                              | 3.61x10 <sup>-3</sup>  |
| 206645_s_at | nuclear receptor subfamily 0, group B, member 1                                               | 2.68                              | 3.27x10 <sup>-3</sup>  |
| 203976_s_at | chromatin assembly factor 1, subunit A (p150)                                                 | 2.67                              | 1.63x10 <sup>-5</sup>  |
| 212489_at   | collagen, type V, alpha 1                                                                     | 2.67                              | 1.72x10 <sup>-5</sup>  |
| 209921_at   | solute carrier family 7, (cationic amino acid transporter, y+ system) member 11               | 2.66                              | 9.70x10 <sup>-4</sup>  |
| 205650_s_at | fibrinogen alpha chain                                                                        | 2.66                              | 8.28x10 <sup>-3</sup>  |
| 202705_at   | cyclin B2                                                                                     | 2.65                              | 8.00x10 <sup>-9</sup>  |
| 202094_at   | baculoviral IAP repeat-containing 5 (survivin)                                                | 2.64                              | 2.82x10 <sup>-5</sup>  |
| 202504_at   | tripartite motif-containing 29                                                                | 2.64                              | 1.86x10 <sup>-3</sup>  |
| 221909_at   | ring finger protein, transmembrane 2                                                          | 2.64                              | 6.66x10 <sup>-3</sup>  |
| 204078_at   | synaptonemal complex protein SC65                                                             | 2.64                              | 3.47x10 <sup>-5</sup>  |
| 204146_at   | RAD51 associated protein 1                                                                    | 2.63                              | 3.93x10 <sup>-7</sup>  |
| 201292_at   | topoisomerase (DNA) II alpha 170kDa                                                           | 2.63                              | 1.48x10 <sup>-8</sup>  |

**Supplemental Gene List III. Transcriptomal Differences between Basal Cell (BC)-high  
Adenocarcinoma (adenoCa) vs BC-low AdenoCa (cont. page 5)**

| Probe ID    | Gene name                                                                                               | BC-high adenoCa vs BC-low adenoCa |                        |
|-------------|---------------------------------------------------------------------------------------------------------|-----------------------------------|------------------------|
|             |                                                                                                         | Fold-change                       | p value                |
| 212110_at   | solute carrier family 39 (zinc transporter), member 14                                                  | 2.63                              | 2.33x10 <sup>-8</sup>  |
| 202267_at   | laminin, gamma 2                                                                                        | 2.62                              | 6.05x10 <sup>-5</sup>  |
| 204933_s_at | tumor necrosis factor receptor superfamily, member 11b<br>(osteoprotegerin)                             | 2.61                              | 1.87x10 <sup>-3</sup>  |
| 219787_s_at | epithelial cell transforming sequence 2 oncogene                                                        | 2.61                              | 6.99x10 <sup>-8</sup>  |
| 219936_s_at | G protein-coupled receptor 87                                                                           | 2.61                              | 4.31x10 <sup>-3</sup>  |
| 208103_s_at | acidic (leucine-rich) nuclear phosphoprotein 32 family,<br>member E                                     | 2.60                              | 1.45x10 <sup>-7</sup>  |
| 204709_s_at | kinesin family member 23                                                                                | 2.60                              | 4.89x10 <sup>-5</sup>  |
| 211756_at   | parathyroid hormone-like hormone                                                                        | 2.60                              | 1.12x10 <sup>-3</sup>  |
| 210683_at   | neurturin                                                                                               | 2.59                              | 1.93x10 <sup>-4</sup>  |
| 201266_at   | thioredoxin reductase 1                                                                                 | 2.59                              | 1.54x10 <sup>-7</sup>  |
| 202219_at   | solute carrier family 6 (neurotransmitter transporter,<br>creatine), member 8                           | 2.59                              | 1.23x10 <sup>-3</sup>  |
| 203764_at   | discs, large homolog 7 (Drosophila)                                                                     | 2.58                              | 4.47x10 <sup>-9</sup>  |
| 214469_at   | histone 1, H2ae                                                                                         | 2.55                              | 5.85x10 <sup>-3</sup>  |
| 203691_at   | peptidase inhibitor 3, skin-derived (SKALP)                                                             | 2.55                              | 7.14x10 <sup>-3</sup>  |
| 206074_s_at | high mobility group AT-hook 1                                                                           | 2.55                              | 1.75x10 <sup>-10</sup> |
| 204822_at   | TTK protein kinase                                                                                      | 2.55                              | 5.73x10 <sup>-8</sup>  |
| 214240_at   | galanin                                                                                                 | 2.55                              | 4.17x10 <sup>-5</sup>  |
| 214639_s_at | homeo box A1                                                                                            | 2.54                              | 3.21x10 <sup>-3</sup>  |
| 208607_s_at | serum amyloid A1 ; serum amyloid A2                                                                     | 2.53                              | 4.61x10 <sup>-3</sup>  |
| 222037_at   | MCM4 minichromosome maintenance deficient 4 (S.<br>cerevisiae)                                          | 2.53                              | 5.08x10 <sup>-6</sup>  |
| 204766_s_at | nudix (nucleoside diphosphate linked moiety X)-type<br>motif 1                                          | 2.52                              | 1.67x10 <sup>-4</sup>  |
| 218009_s_at | protein regulator of cytokinesis 1                                                                      | 2.51                              | 2.73x10 <sup>-8</sup>  |
| 205924_at   | RAB3B, member RAS oncogene family                                                                       | 2.51                              | 1.78x10 <sup>-4</sup>  |
| 202912_at   | adrenomedullin                                                                                          | 2.50                              | 4.11x10 <sup>-6</sup>  |
| 218944_at   | pyrroline-5-carboxylate reductase-like                                                                  | 2.50                              | 2.04x10 <sup>-4</sup>  |
| 201761_at   | methylenetetrahydrofolate dehydrogenase (NADP+<br>dependent) 2, methenyltetrahydrofolate cyclohydrolase | 2.50                              | 2.50x10 <sup>-9</sup>  |
| 207165_at   | hyaluronan-mediated motility receptor (RHAMM)                                                           | 2.50                              | 5.84x10 <sup>-7</sup>  |
| 204430_s_at | solute carrier family 2 (facilitated glucose/fructose<br>transporter), member 5                         | 2.49                              | 2.22x10 <sup>-4</sup>  |
| 203699_s_at | deiodinase, iodothyronine, type II                                                                      | 2.49                              | 1.33x10 <sup>-3</sup>  |
| 221539_at   | eukaryotic translation initiation factor 4E binding protein 1                                           | 2.49                              | 3.91x10 <sup>-7</sup>  |



**Supplemental Gene List III. Transcriptomal Differences between Basal Cell (BC)-high  
Adenocarcinoma (adenoCa) vs BC-low AdenoCa (cont. page 6)**

| Probe ID    | Gene name                                                                                  | BC-high adenoCa vs BC-low adenoCa |                       |
|-------------|--------------------------------------------------------------------------------------------|-----------------------------------|-----------------------|
|             |                                                                                            | Fold-change                       | p value               |
| 219650_at   | excision repair cross-complementing rodent repair deficiency, complementation group 6-like | 2.48                              | 4.91x10 <sup>-5</sup> |
| 204879_at   | podoplanin                                                                                 | 2.48                              | 1.87x10 <sup>-3</sup> |
| 210145_at   | phospholipase A2, group IVA (cytosolic, calcium-dependent)                                 | 2.47                              | 5.02x10 <sup>-4</sup> |
| 206067_s_at | Wilms tumor 1                                                                              | 2.47                              | 6.08x10 <sup>-3</sup> |
| 202589_at   | thymidylate synthetase                                                                     | 2.47                              | 2.00x10 <sup>-8</sup> |
| 213909_at   | leucine rich repeat containing 15                                                          | 2.47                              | 6.91x10 <sup>-5</sup> |
| 214463_x_at | histone 1, H4k ; histone 1, H4j                                                            | 2.46                              | 8.43x10 <sup>-5</sup> |
| 202954_at   | ubiquitin-conjugating enzyme E2C                                                           | 2.46                              | 3.90x10 <sup>-8</sup> |
| 204385_at   | kynureninase (L-kynurenine hydrolase)                                                      | 2.46                              | 8.37x10 <sup>-5</sup> |
| 205499_at   | sushi-repeat-containing protein, X-linked 2                                                | 2.46                              | 1.72x10 <sup>-5</sup> |
| 211150_s_at | dihydrolipoamide S-acetyltransferase (E2 component of pyruvate dehydrogenase complex)      | 2.46                              | 6.15x10 <sup>-5</sup> |
| 209372_x_at | tubulin, beta 2 ; tubulin, beta polypeptide paralog                                        | 2.46                              | 2.57x10 <sup>-4</sup> |
| 203083_at   | thrombospondin 2                                                                           | 2.45                              | 3.79x10 <sup>-6</sup> |
| 201629_s_at | acid phosphatase 1, soluble                                                                | 2.45                              | 8.64x10 <sup>-7</sup> |
| 208079_s_at | serine/threonine kinase 6                                                                  | 2.44                              | 6.09x10 <sup>-8</sup> |
| 213640_s_at | lysyl oxidase                                                                              | 2.44                              | 9.41x10 <sup>-5</sup> |
| 214290_s_at | histone 2, H2aa                                                                            | 2.44                              | 3.19x10 <sup>-5</sup> |
| 213943_at   | twist homolog 1 (acrocephalosyndactyly 3; Saethre-Chotzen syndrome) (Drosophila)           | 2.43                              | 2.93x10 <sup>-6</sup> |
| 205568_at   | aquaporin 9                                                                                | 2.43                              | 4.08x10 <sup>-4</sup> |
| 204344_s_at | Sec23 homolog A (S. cerevisiae)                                                            | 2.43                              | 2.26x10 <sup>-5</sup> |
| 215076_s_at | collagen, type III, alpha 1 (Ehlers-Danlos syndrome type IV, autosomal dominant)           | 2.42                              | 1.35x10 <sup>-7</sup> |
| 217640_x_at | chromosome 18 open reading frame 24                                                        | 2.41                              | 1.58x10 <sup>-3</sup> |
| 219249_s_at | FK506 binding protein 10, 65 kDa                                                           | 2.41                              | 4.54x10 <sup>-4</sup> |
| 206391_at   | retinoic acid receptor responder (tazarotene induced) 1                                    | 2.41                              | 3.72x10 <sup>-3</sup> |
| 219032_x_at | opsin 3 (encephalopsin, panopsin)                                                          | 2.40                              | 3.71x10 <sup>-8</sup> |
| 202765_s_at | fibrillin 1 (Marfan syndrome)                                                              | 2.39                              | 3.05x10 <sup>-3</sup> |
| 203440_at   | cadherin 2, type 1, N-cadherin (neuronal)                                                  | 2.39                              | 4.98x10 <sup>-3</sup> |
| 212396_s_at | KIAA0090                                                                                   | 2.39                              | 1.46x10 <sup>-3</sup> |
| 204558_at   | RAD54-like (S. cerevisiae)                                                                 | 2.39                              | 1.37x10 <sup>-4</sup> |
| 205240_at   | G-protein signalling modulator 2 (AGS3-like, C. elegans)                                   | 2.39                              | 2.55x10 <sup>-4</sup> |
| 220789_s_at | transforming growth factor beta regulator 4                                                | 2.39                              | 9.70x10 <sup>-6</sup> |
| 212942_s_at | KIAA1199                                                                                   | 2.38                              | 4.55x10 <sup>-5</sup> |
| 219232_s_at | egl nine homolog 3 (C. elegans)                                                            | 2.38                              | 2.09x10 <sup>-6</sup> |

**Supplemental Gene List III. Transcriptomal Differences between Basal Cell (BC)-high  
Adenocarcinoma (adenoCa) vs BC-low AdenoCa (cont. page 7)**

| Probe ID    | Gene name                                                                                      | BC-high adenoCa vs BC-low adenoCa |                       |
|-------------|------------------------------------------------------------------------------------------------|-----------------------------------|-----------------------|
|             |                                                                                                | Fold-change                       | p value               |
| 204026_s_at | ZW10 interactor                                                                                | 2.38                              | 3.07x10 <sup>-7</sup> |
| 220442_at   | UDP-N-acetyl-alpha-D-galactosamine:polypeptide N-acetylgalactosaminyltransferase 4 (GalNAc-T4) | 2.37                              | 3.19x10 <sup>-6</sup> |
| 209955_s_at | fibroblast activation protein, alpha                                                           | 2.37                              | 6.50x10 <sup>-8</sup> |
| 217818_s_at | actin related protein 2/3 complex, subunit 4, 20kDa                                            | 2.37                              | 8.24x10 <sup>-4</sup> |
| 203477_at   | collagen, type XV, alpha 1                                                                     | 2.37                              | 5.63x10 <sup>-5</sup> |
| 202240_at   | polo-like kinase 1 (Drosophila)                                                                | 2.37                              | 9.87x10 <sup>-6</sup> |
| 219926_at   | popeye domain containing 3                                                                     | 2.36                              | 2.62x10 <sup>-3</sup> |
| 209875_s_at | secreted phosphoprotein 1 (osteopontin, bone sialoprotein I, early T-lymphocyte activation 1)  | 2.35                              | 7.48x10 <sup>-4</sup> |
| 218585_s_at | denticleless homolog (Drosophila)                                                              | 2.35                              | 3.63x10 <sup>-7</sup> |
| 211148_s_at | angiopoietin 2                                                                                 | 2.35                              | 4.16x10 <sup>-4</sup> |
| 205071_x_at | X-ray repair complementing defective repair in Chinese hamster cells 4                         | 2.34                              | 8.24x10 <sup>-4</sup> |
| 202949_s_at | four and a half LIM domains 2                                                                  | 2.33                              | 2.33x10 <sup>-6</sup> |
| 209270_at   | laminin, beta 3                                                                                | 2.33                              | 1.92x10 <sup>-4</sup> |
| 220254_at   | low density lipoprotein-related protein 12                                                     | 2.32                              | 2.43x10 <sup>-3</sup> |
| 209714_s_at | cyclin-dependent kinase inhibitor 3 (CDK2-associated dual specificity phosphatase)             | 2.32                              | 1.91x10 <sup>-9</sup> |
| 213139_at   | snail homolog 2 (Drosophila)                                                                   | 2.32                              | 1.21x10 <sup>-5</sup> |
| 202503_s_at | KIAA0101                                                                                       | 2.32                              | 9.83x10 <sup>-7</sup> |
| 40472_at    | PLSC domain containing protein                                                                 | 2.32                              | 2.14x10 <sup>-4</sup> |
| 201489_at   | peptidylprolyl isomerase F (cyclophilin F)                                                     | 2.31                              | 4.42x10 <sup>-8</sup> |
| 219410_at   | transmembrane protein 45A                                                                      | 2.31                              | 4.96x10 <sup>-5</sup> |
| 204714_s_at | coagulation factor V (proaccelerin, labile factor)                                             | 2.31                              | 1.07x10 <sup>-3</sup> |
| 213680_at   | keratin 6B                                                                                     | 2.31                              | 3.01x10 <sup>-3</sup> |
| 213765_at   | microfibrillar associated protein 5                                                            | 2.30                              | 1.81x10 <sup>-3</sup> |
| 205266_at   | leukemia inhibitory factor (cholinergic differentiation factor)                                | 2.30                              | 3.68x10 <sup>-5</sup> |
| 204170_s_at | CDC28 protein kinase regulatory subunit 2                                                      | 2.30                              | 7.33x10 <sup>-8</sup> |
| 219366_at   | apoptosis, caspase activation inhibitor                                                        | 2.30                              | 1.10x10 <sup>-8</sup> |
| 203755_at   | BUB1 budding uninhibited by benzimidazoles 1 homolog beta (yeast)                              | 2.29                              | 1.68x10 <sup>-8</sup> |
| 217428_s_at | collagen, type X, alpha 1(Schmid metaphyseal chondrodysplasia)                                 | 2.29                              | 4.33x10 <sup>-3</sup> |
| 205229_s_at | coagulation factor C homolog, coxlin (Limulus polyphemus)                                      | 2.29                              | 2.98x10 <sup>-3</sup> |

**Supplemental Gene List III. Transcriptomal Differences between Basal Cell (BC)-high  
Adenocarcinoma (adenoCa) vs BC-low AdenoCa (cont. page 8)**

| Probe ID    | Gene name                                                                                               | BC-high adenoCa vs BC-low adenoCa |                       |
|-------------|---------------------------------------------------------------------------------------------------------|-----------------------------------|-----------------------|
|             |                                                                                                         | Fold-change                       | p value               |
| 201195_s_at | solute carrier family 7 (cationic amino acid transporter, y+ system), member 5                          | 2.28                              | 1.06x10 <sup>-3</sup> |
| 204256_at   | ELOVL family member 6, elongation of long chain fatty acids (FEN1/Elo2, SUR4/Elo3-like, yeast)          | 2.28                              | 2.11x10 <sup>-6</sup> |
| 222206_s_at | nicalin homolog (zebrafish)                                                                             | 2.28                              | 1.40x10 <sup>-4</sup> |
| 216913_s_at | KIAA0690                                                                                                | 2.27                              | 3.39x10 <sup>-4</sup> |
| 204033_at   | thyroid hormone receptor interactor 13                                                                  | 2.27                              | 3.82x10 <sup>-6</sup> |
| 204748_at   | prostaglandin-endoperoxide synthase 2 (prostaglandin G/H synthase and cyclooxygenase)                   | 2.27                              | 9.15x10 <sup>-3</sup> |
| 217755_at   | hematological and neurological expressed 1                                                              | 2.26                              | 9.28x10 <sup>-8</sup> |
| 210135_s_at | short stature homeobox 2                                                                                | 2.26                              | 1.36x10 <sup>-3</sup> |
| 201930_at   | MCM6 minichromosome maintenance deficient 6 (MIS5 homolog, <i>S. pombe</i> ) ( <i>S. cerevisiae</i> )   | 2.26                              | 5.44x10 <sup>-9</sup> |
| 202499_s_at | solute carrier family 2 (facilitated glucose transporter), member 3                                     | 2.26                              | 3.77x10 <sup>-6</sup> |
| 201897_s_at | CDC28 protein kinase regulatory subunit 1B                                                              | 2.25                              | 6.15x10 <sup>-9</sup> |
| 204444_at   | kinesin family member 11                                                                                | 2.25                              | 8.95x10 <sup>-8</sup> |
| 217312_s_at | collagen, type VII, alpha 1 (epidermolysis bullosa, dystrophic, dominant and recessive)                 | 2.25                              | 1.07x10 <sup>-3</sup> |
| 205207_at   | interleukin 6 (interferon, beta 2)                                                                      | 2.25                              | 7.02x10 <sup>-6</sup> |
| 202923_s_at | glutamate-cysteine ligase, catalytic subunit                                                            | 2.25                              | 4.35x10 <sup>-5</sup> |
| 204114_at   | nidogen 2 (osteonidogen)                                                                                | 2.25                              | 1.95x10 <sup>-5</sup> |
| 205535_s_at | BH-protocadherin (brain-heart)                                                                          | 2.25                              | 4.25x10 <sup>-3</sup> |
| 218975_at   | collagen, type V, alpha 3                                                                               | 2.24                              | 3.08x10 <sup>-4</sup> |
| 211564_s_at | PDZ and LIM domain 4                                                                                    | 2.24                              | 8.35x10 <sup>-4</sup> |
| 218245_at   | leucine rich repeat containing 54                                                                       | 2.24                              | 6.07x10 <sup>-5</sup> |
| 205394_at   | CHK1 checkpoint homolog ( <i>S. pombe</i> )                                                             | 2.24                              | 3.66x10 <sup>-7</sup> |
| 204457_s_at | growth arrest-specific 1                                                                                | 2.24                              | 4.54x10 <sup>-3</sup> |
| 212022_s_at | antigen identified by monoclonal antibody Ki-67                                                         | 2.24                              | 3.26x10 <sup>-6</sup> |
| 211071_s_at | myeloid/lymphoid or mixed-lineage leukemia (trithorax homolog, <i>Drosophila</i> ); translocated to, 11 | 2.23                              | 9.84x10 <sup>-6</sup> |
| 219634_at   | carbohydrate (chondroitin 4) sulfotransferase 11                                                        | 2.23                              | 1.52x10 <sup>-6</sup> |
| 221781_s_at | DnaJ (Hsp40) homolog, subfamily C, member 10                                                            | 2.23                              | 3.71x10 <sup>-8</sup> |
| 218653_at   | solute carrier family 25 (mitochondrial carrier; ornithine transporter) member 15                       | 2.23                              | 7.41x10 <sup>-6</sup> |
| 205460_at   | neuronal PAS domain protein 2                                                                           | 2.22                              | 2.49x10 <sup>-3</sup> |
| 219201_s_at | twisted gastrulation homolog 1 ( <i>Drosophila</i> )                                                    | 2.22                              | 3.28x10 <sup>-3</sup> |
| 222077_s_at | Rac GTPase activating protein 1                                                                         | 2.22                              | 2.40x10 <sup>-7</sup> |

**Supplemental Gene List III. Transcriptomal Differences between Basal Cell (BC)-high  
Adenocarcinoma (adenoCa) vs BC-low AdenoCa (cont. page 9)**

| Probe ID    | Gene name                                                                                 | BC-high adenoCa vs BC-low adenoCa |                        |
|-------------|-------------------------------------------------------------------------------------------|-----------------------------------|------------------------|
|             |                                                                                           | Fold-change                       | p value                |
| 212242_at   | tubulin, alpha 1 (testis specific)                                                        | 2.22                              | 2.79x10 <sup>-10</sup> |
| 211088_s_at | polo-like kinase 4 (Drosophila)                                                           | 2.22                              | 1.58x10 <sup>-3</sup>  |
| 214702_at   | fibronectin 1                                                                             | 2.22                              | 2.87x10 <sup>-4</sup>  |
| 202458_at   | protease, serine, 23                                                                      | 2.21                              | 1.12x10 <sup>-5</sup>  |
| 221777_at   | chromosome 12 open reading frame 52                                                       | 2.21                              | 3.88x10 <sup>-4</sup>  |
| 204338_s_at | regulator of G-protein signalling 4                                                       | 2.20                              | 9.99x10 <sup>-3</sup>  |
| 206364_at   | kinesin family member 14                                                                  | 2.20                              | 1.03x10 <sup>-6</sup>  |
| 208850_s_at | Thy-1 cell surface antigen                                                                | 2.20                              | 8.71x10 <sup>-6</sup>  |
| 220093_at   | anthrax toxin receptor 1                                                                  | 2.20                              | 7.35x10 <sup>-4</sup>  |
| 222039_at   | kinesin family member 18B                                                                 | 2.20                              | 8.84x10 <sup>-7</sup>  |
| 214845_s_at | calumenin                                                                                 | 2.20                              | 9.09x10 <sup>-8</sup>  |
| 215223_s_at | superoxide dismutase 2, mitochondrial                                                     | 2.20                              | 3.05x10 <sup>-5</sup>  |
| 202154_x_at | tubulin, beta 3                                                                           | 2.19                              | 4.03x10 <sup>-13</sup> |
| 204401_at   | potassium intermediate/small conductance calcium-activated channel, subfamily N, member 4 | 2.19                              | 2.13x10 <sup>-4</sup>  |
| 209406_at   | BCL2-associated athanogene 2                                                              | 2.19                              | 5.12x10 <sup>-6</sup>  |
| 204597_x_at | stanniocalcin 1                                                                           | 2.19                              | 1.31x10 <sup>-5</sup>  |
| 206595_at   | cystatin E/M                                                                              | 2.19                              | 5.96x10 <sup>-3</sup>  |
| 218498_s_at | ERO1-like (S. cerevisiae)                                                                 | 2.18                              | 5.24x10 <sup>-8</sup>  |
| 219874_at   | solute carrier family 12 (potassium/chloride transporters), member 8                      | 2.18                              | 1.40x10 <sup>-7</sup>  |
| 216228_s_at | WD repeat and HMG-box DNA binding protein 1                                               | 2.18                              | 2.68x10 <sup>-4</sup>  |
| 205774_at   | coagulation factor XII (Hageman factor)                                                   | 2.17                              | 1.22x10 <sup>-4</sup>  |
| 204941_s_at | aldehyde dehydrogenase 3 family, member B2                                                | 2.16                              | 9.75x10 <sup>-3</sup>  |
| 209877_at   | synuclein, gamma (breast cancer-specific protein 1)                                       | 2.16                              | 3.50x10 <sup>-4</sup>  |
| 202338_at   | thymidine kinase 1, soluble                                                               | 2.15                              | 1.77x10 <sup>-8</sup>  |
| 205691_at   | synaptogyrin 3                                                                            | 2.15                              | 2.00x10 <sup>-3</sup>  |
| 206079_at   | choroideremia-like (Rab escort protein 2)                                                 | 2.15                              | 8.00x10 <sup>-5</sup>  |
| 218644_at   | pleckstrin 2                                                                              | 2.15                              | 9.70x10 <sup>-6</sup>  |
| 203936_s_at | matrix metalloproteinase 9 (gelatinase B, 92kDa gelatinase, 92kDa type IV collagenase)    | 2.15                              | 8.34x10 <sup>-4</sup>  |
| 210095_s_at | insulin-like growth factor binding protein 3                                              | 2.15                              | 4.17x10 <sup>-5</sup>  |
| 218883_s_at | MLF1 interacting protein                                                                  | 2.14                              | 1.45x10 <sup>-6</sup>  |
| 219270_at   | ChaC, cation transport regulator homolog 1 (E. coli)                                      | 2.14                              | 6.61x10 <sup>-5</sup>  |
| 214866_at   | plasminogen activator, urokinase receptor                                                 | 2.13                              | 6.57x10 <sup>-9</sup>  |
| 221591_s_at | family with sequence similarity 64, member A                                              | 2.13                              | 5.84x10 <sup>-6</sup>  |
| 200853_at   | H2A histone family, member Z                                                              | 2.12                              | 1.22x10 <sup>-8</sup>  |
| 209464_at   | aurora kinase B                                                                           | 2.12                              | 1.45x10 <sup>-5</sup>  |

**Supplemental Gene List III. Transcriptomal Differences between Basal Cell (BC)-high  
Adenocarcinoma (adenoCa) vs BC-low AdenoCa (cont. page 10)**

| Probe ID    | Gene name                                                                               | BC-high adenoCa vs BC-low adenoCa |                        |
|-------------|-----------------------------------------------------------------------------------------|-----------------------------------|------------------------|
|             |                                                                                         | Fold-change                       | p value                |
| 209850_s_at | CDC42 effector protein (Rho GTPase binding) 2                                           | 2.12                              | 1.83x10 <sup>-5</sup>  |
| 220198_s_at | eukaryotic translation initiation factor 5A2                                            | 2.12                              | 1.37x10 <sup>-4</sup>  |
| 213520_at   | RecQ protein-like 4                                                                     | 2.11                              | 2.25x10 <sup>-3</sup>  |
| 219311_at   | chromosome 18 open reading frame 9                                                      | 2.11                              | 1.32x10 <sup>-5</sup>  |
| 210397_at   | defensin, beta 1                                                                        | 2.11                              | 4.58x10 <sup>-3</sup>  |
| 218980_at   | formin homology 2 domain containing 3                                                   | 2.11                              | 9.55x10 <sup>-3</sup>  |
| 221598_s_at | cofactor required for Sp1 transcriptional activation, subunit 8, 34kDa                  | 2.11                              | 8.23x10 <sup>-4</sup>  |
| 209832_s_at | DNA replication factor                                                                  | 2.11                              | 1.33x10 <sup>-4</sup>  |
| 218046_s_at | mitochondrial ribosomal protein S16                                                     | 2.11                              | 2.26x10 <sup>-6</sup>  |
| 201506_at   | transforming growth factor, beta-induced, 68kDa                                         | 2.11                              | 1.72x10 <sup>-5</sup>  |
| 204427_s_at | transmembrane emp24 domain trafficking protein 2                                        | 2.10                              | 6.58x10 <sup>-5</sup>  |
| 209408_at   | kinesin family member 2C                                                                | 2.10                              | 1.41x10 <sup>-8</sup>  |
| 203270_at   | deoxythymidylate kinase (thymidylate kinase)                                            | 2.10                              | 8.13x10 <sup>-7</sup>  |
| 201105_at   | lectin, galactoside-binding, soluble, 1 (galectin 1)                                    | 2.10                              | 1.23x10 <sup>-8</sup>  |
| 214981_at   | Periostin, osteoblast specific factor                                                   | 2.10                              | 7.99x10 <sup>-3</sup>  |
| 205085_at   | origin recognition complex, subunit 1-like (yeast)                                      | 2.10                              | 1.08x10 <sup>-3</sup>  |
| 206103_at   | ras-related C3 botulinum toxin substrate 3 (rho family, small GTP binding protein Rac3) | 2.09                              | 7.21x10 <sup>-4</sup>  |
| 209156_s_at | collagen, type VI, alpha 2                                                              | 2.09                              | 1.36x10 <sup>-5</sup>  |
| 207828_s_at | centromere protein F, 350/400ka (mitosin)                                               | 2.09                              | 5.20x10 <sup>-6</sup>  |
| 219493_at   | SHC SH2-domain binding protein 1                                                        | 2.09                              | 1.21x10 <sup>-6</sup>  |
| 210138_at   | regulator of G-protein signalling 20                                                    | 2.09                              | 5.40x10 <sup>-3</sup>  |
| 217996_at   | pleckstrin homology-like domain, family A, member 1                                     | 2.09                              | 1.85x10 <sup>-6</sup>  |
| 221410_x_at | protocadherin beta 3                                                                    | 2.09                              | 3.19x10 <sup>-3</sup>  |
| 220124_at   | giant axonal neuropathy (gigaxonin)                                                     | 2.08                              | 7.57x10 <sup>-5</sup>  |
| 201940_at   | carboxypeptidase D                                                                      | 2.08                              | 1.54x10 <sup>-5</sup>  |
| 218039_at   | nucleolar and spindle associated protein 1                                              | 2.08                              | 5.65x10 <sup>-8</sup>  |
| 221845_s_at | ClpB caseinolytic peptidase B homolog (E. coli)                                         | 2.08                              | 4.07x10 <sup>-3</sup>  |
| 221291_at   | UL16 binding protein 2                                                                  | 2.07                              | 1.89x10 <sup>-3</sup>  |
| 202990_at   | phosphorylase, glycogen; liver (Hers disease, glycogen storage disease type VI)         | 2.07                              | 1.64x10 <sup>-7</sup>  |
| 206389_s_at | phosphodiesterase 3A, cGMP-inhibited                                                    | 2.07                              | 6.55x10 <sup>-3</sup>  |
| 217744_s_at | PERP, TP53 apoptosis effector                                                           | 2.07                              | 1.12x10 <sup>-6</sup>  |
| 218782_s_at | ATPase family, AAA domain containing 2                                                  | 2.07                              | 2.06x10 <sup>-5</sup>  |
| 205066_s_at | ectonucleotide pyrophosphatase/phosphodiesterase 1                                      | 2.06                              | 1.21x10 <sup>-3</sup>  |
| 208696_at   | chaperonin containing TCP1, subunit 5 (epsilon)                                         | 2.06                              | 1.48x10 <sup>-8</sup>  |
| 205436_s_at | H2A histone family, member X                                                            | 2.06                              | 9.68x10 <sup>-10</sup> |

**Supplemental Gene List III. Transcriptomal Differences between Basal Cell (BC)-high  
Adenocarcinoma (adenoCa) vs BC-low AdenoCa (cont. page 11)**

| Probe ID    | Gene name                                                                           | BC-high adenoCa vs BC-low adenoCa |                        |
|-------------|-------------------------------------------------------------------------------------|-----------------------------------|------------------------|
|             |                                                                                     | Fold-change                       | p value                |
| 210115_at   | ribosomal protein L39-like                                                          | 2.06                              | 4.61x10 <sup>-3</sup>  |
| 201504_s_at | translin                                                                            | 2.06                              | 2.95x10 <sup>-4</sup>  |
| 205780_at   | BCL2-interacting killer (apoptosis-inducing)                                        | 2.06                              | 3.10x10 <sup>-3</sup>  |
| 37145_at    | granulysin                                                                          | 2.06                              | 4.26x10 <sup>-3</sup>  |
| 209803_s_at | pleckstrin homology-like domain, family A, member 2                                 | 2.06                              | 2.77x10 <sup>-5</sup>  |
| 205552_s_at | 2',5'-oligoadenylate synthetase 1, 40/46kDa                                         | 2.06                              | 1.77x10 <sup>-4</sup>  |
| 221261_x_at | melanoma antigen family D, 4 ; melanoma antigen family D, 4                         | 2.05                              | 9.60x10 <sup>-3</sup>  |
| 201268_at   | non-metastatic cells 2, protein (NM23B) expressed in                                | 2.05                              | 4.03x10 <sup>-13</sup> |
| 214581_x_at | tumor necrosis factor receptor superfamily, member 21                               | 2.05                              | 9.32x10 <sup>-5</sup>  |
| 205796_at   | t-complex 11 (mouse) like 1                                                         | 2.04                              | 1.79x10 <sup>-5</sup>  |
| 210517_s_at | A kinase (PRKA) anchor protein (gravin) 12                                          | 2.04                              | 3.68x10 <sup>-4</sup>  |
| 202483_s_at | RAN binding protein 1                                                               | 2.04                              | 3.61x10 <sup>-8</sup>  |
| 204470_at   | chemokine (C-X-C motif) ligand 1 (melanoma growth stimulating activity, alpha)      | 2.04                              | 2.90x10 <sup>-3</sup>  |
| 204750_s_at | desmocollin 2                                                                       | 2.04                              | 1.21x10 <sup>-4</sup>  |
| 209122_at   | adipose differentiation-related protein                                             | 2.04                              | 7.91x10 <sup>-6</sup>  |
| 201755_at   | MCM5 minichromosome maintenance deficient 5, cell division cycle 46 (S. cerevisiae) | 2.04                              | 2.57x10 <sup>-3</sup>  |
| 212481_s_at | tropomyosin 4                                                                       | 2.03                              | 9.68x10 <sup>-10</sup> |
| 209260_at   | stratifin                                                                           | 2.03                              | 4.64x10 <sup>-4</sup>  |
| 208511_at   | pituitary tumor-transforming 3                                                      | 2.03                              | 4.67x10 <sup>-4</sup>  |
| 219532_at   | elongation of very long chain fatty acids (FEN1/Elo2, SUR4/Elo3, yeast)-like 4      | 2.03                              | 7.93x10 <sup>-3</sup>  |
| 201263_at   | threonyl-tRNA synthetase                                                            | 2.02                              | 3.06x10 <sup>-9</sup>  |
| 204341_at   | tripartite motif-containing 16 ; tripartite motif containing 16-like                | 2.02                              | 1.13x10 <sup>-5</sup>  |
| 220532_s_at | LR8 protein                                                                         | 2.02                              | 2.20x10 <sup>-4</sup>  |
| 203414_at   | monocyte to macrophage differentiation-associated                                   | 2.02                              | 6.09x10 <sup>-8</sup>  |
| 205574_x_at | bone morphogenetic protein 1                                                        | 2.02                              | 5.64x10 <sup>-7</sup>  |
| 209567_at   | RRS1 ribosome biogenesis regulator homolog (S. cerevisiae)                          | 2.02                              | 1.68x10 <sup>-5</sup>  |
| 219257_s_at | sphingosine kinase 1                                                                | 2.02                              | 2.17x10 <sup>-9</sup>  |
| 202431_s_at | v-myc myelocytomatosis viral oncogene homolog (avian)                               | 2.02                              | 3.67x10 <sup>-4</sup>  |
| 217738_at   | pre-B-cell colony enhancing factor 1                                                | 2.02                              | 4.80x10 <sup>-6</sup>  |
| 208381_s_at | sphingosine-1-phosphate lyase 1                                                     | 2.02                              | 2.34x10 <sup>-3</sup>  |
| 209642_at   | BUB1 budding uninhibited by benzimidazoles 1 homolog (yeast)                        | 2.02                              | 2.34x10 <sup>-6</sup>  |

**Supplemental Gene List III. Transcriptomal Differences between Basal Cell (BC)-high  
Adenocarcinoma (adenoCa) vs BC-low AdenoCa (cont. page 12)**

| Probe ID                          | Gene name                                                                | BC-high adenoCa vs BC-low adenoCa |                        |
|-----------------------------------|--------------------------------------------------------------------------|-----------------------------------|------------------------|
|                                   |                                                                          | Fold-change                       | p value                |
| 201577_at                         | non-metastatic cells 1, protein (NM23A) expressed in                     | 2.01                              | 1.43x10 <sup>-8</sup>  |
| 211762_s_at                       | karyopherin alpha 2 (RAG cohort 1, importin alpha 1)                     | 2.01                              | 1.68x10 <sup>-8</sup>  |
| 207463_x_at                       | protease, serine, 3 (mesotrypsin)                                        | 2.01                              | 9.83x10 <sup>-3</sup>  |
| AFFX-<br>HUMGAPDH<br>/M33197_5_at | glyceraldehyde-3-phosphate dehydrogenase                                 | 2.01                              | 1.52x10 <sup>-11</sup> |
| 204817_at                         | extra spindle poles like 1 ( <i>S. cerevisiae</i> )                      | 2.01                              | 4.66x10 <sup>-4</sup>  |
| 202235_at                         | solute carrier family 16 (monocarboxylic acid transporters), member 1    | 2.01                              | 4.09x10 <sup>-3</sup>  |
| 202755_s_at                       | glypican 1                                                               | 2.01                              | 4.38x10 <sup>-3</sup>  |
| 213599_at                         | Opa interacting protein 5                                                | 2.00                              | 1.54x10 <sup>-6</sup>  |
| 217919_s_at                       | mitochondrial ribosomal protein L42                                      | 2.00                              | 3.03x10 <sup>-8</sup>  |
| 217785_s_at                       | SNARE protein Ykt6                                                       | 2.00                              | 3.26x10 <sup>-6</sup>  |
| 203799_at                         | CD302 antigen                                                            | 0.50                              | 7.83x10 <sup>-4</sup>  |
| 205671_s_at                       | major histocompatibility complex, class II, DO beta                      | 0.50                              | 5.06x10 <sup>-4</sup>  |
| 209807_s_at                       | nuclear factor I/X (CCAAT-binding transcription factor)                  | 0.50                              | 1.12x10 <sup>-3</sup>  |
| 214053_at                         | V-erb-a erythroblastic leukemia viral oncogene homolog 4 (avian)         | 0.50                              | 8.72x10 <sup>-8</sup>  |
| 216278_at                         | KIAA0256 gene product                                                    | 0.50                              | 4.17x10 <sup>-3</sup>  |
| 209829_at                         | chromosome 6 open reading frame 32                                       | 0.50                              | 9.54x10 <sup>-4</sup>  |
| 211466_at                         | nuclear factor I/B                                                       | 0.50                              | 2.12x10 <sup>-3</sup>  |
| 213856_at                         | CD47 antigen (Rh-related antigen, integrin-associated signal transducer) | 0.50                              | 5.45x10 <sup>-3</sup>  |
| 204266_s_at                       | choline kinase alpha                                                     | 0.50                              | 9.58x10 <sup>-7</sup>  |
| 210051_at                         | Rap guanine nucleotide exchange factor (GEF) 3                           | 0.50                              | 3.20x10 <sup>-3</sup>  |
| 213472_at                         | heterogeneous nuclear ribonucleoprotein H1 (H)                           | 0.50                              | 1.02x10 <sup>-3</sup>  |
| 215314_at                         | Ankyrin 3, node of Ranvier (ankyrin G)                                   | 0.50                              | 5.64x10 <sup>-6</sup>  |
| 210108_at                         | calcium channel, voltage-dependent, L type, alpha 1D subunit             | 0.50                              | 9.51x10 <sup>-4</sup>  |
| 203365_s_at                       | matrix metalloproteinase 15 (membrane-inserted)                          | 0.50                              | 6.05x10 <sup>-3</sup>  |
| 203994_s_at                       | chromosome 21 open reading frame 2                                       | 0.50                              | 1.22x10 <sup>-3</sup>  |
| 212510_at                         | glycerol-3-phosphate dehydrogenase 1-like                                | 0.50                              | 2.93x10 <sup>-6</sup>  |
| 202222_s_at                       | desmin                                                                   | 0.49                              | 6.62x10 <sup>-5</sup>  |
| 205259_at                         | nuclear receptor subfamily 3, group C, member 2                          | 0.49                              | 1.35x10 <sup>-4</sup>  |
| 212774_at                         | zinc finger protein 238                                                  | 0.49                              | 5.77x10 <sup>-7</sup>  |
| 208135_at                         | HNF1 homeobox B                                                          | 0.49                              | 5.91x10 <sup>-4</sup>  |
| 220221_at                         | vacuolar protein sorting 13D (yeast)                                     | 0.49                              | 1.91x10 <sup>-4</sup>  |
| 212841_s_at                       | PTPRF interacting protein, binding protein 2 (liprin beta 2)             | 0.49                              | 3.47x10 <sup>-5</sup>  |

**Supplemental Gene List III. Transcriptomal Differences between Basal Cell (BC)-high  
Adenocarcinoma (adenoCa) vs BC-low AdenoCa (cont. page 13)**

| Probe ID    | Gene name                                                       | BC-high adenoCa vs BC-low adenoCa |                       |
|-------------|-----------------------------------------------------------------|-----------------------------------|-----------------------|
|             |                                                                 | Fold-change                       | p value               |
| 204039_at   | CCAAT/enhancer binding protein (C/EBP), alpha                   | 0.49                              | 2.83x10 <sup>-5</sup> |
| 215536_at   | major histocompatibility complex, class II, DQ beta 2           | 0.49                              | 7.87x10 <sup>-3</sup> |
| 222150_s_at | pigeon homolog (Drosophila)                                     | 0.49                              | 2.44x10 <sup>-8</sup> |
| 214250_at   | nuclear mitotic apparatus protein 1                             | 0.49                              | 3.50x10 <sup>-3</sup> |
| 204130_at   | hydroxysteroid (11-beta) dehydrogenase 2                        | 0.49                              | 8.33x10 <sup>-3</sup> |
| 204802_at   | Ras-related associated with diabetes                            | 0.49                              | 1.56x10 <sup>-3</sup> |
| 206714_at   | arachidonate 15-lipoxygenase, second type                       | 0.49                              | 2.01x10 <sup>-3</sup> |
| 217422_s_at | CD22 antigen ; myelin associated glycoprotein                   | 0.49                              | 3.30x10 <sup>-3</sup> |
| 219127_at   | proline rich 15-like                                            | 0.49                              | 2.23x10 <sup>-5</sup> |
| 204497_at   | adenylate cyclase 9                                             | 0.48                              | 6.13x10 <sup>-6</sup> |
| 201540_at   | four and a half LIM domains 1                                   | 0.48                              | 1.66x10 <sup>-3</sup> |
| 205316_at   | Solute carrier family 15 (H+/peptide transporter), member 2     | 0.48                              | 2.99x10 <sup>-5</sup> |
| 205619_s_at | mesenchyme homeo box 1                                          | 0.48                              | 9.91x10 <sup>-5</sup> |
| 214657_s_at | Trophoblast-derived noncoding RNA                               | 0.48                              | 4.02x10 <sup>-4</sup> |
| 214035_x_at | nuclear pore complex interacting protein-like 3                 | 0.48                              | 1.94x10 <sup>-7</sup> |
| 219389_at   | sushi domain containing 4                                       | 0.48                              | 4.56x10 <sup>-3</sup> |
| 220168_at   | cancer susceptibility candidate 1                               | 0.48                              | 4.63x10 <sup>-5</sup> |
| 219136_s_at | lipase maturation factor 1                                      | 0.48                              | 7.69x10 <sup>-4</sup> |
| 213212_x_at | golgin A6 family-like 5 (pseudogene)                            | 0.48                              | 4.06x10 <sup>-6</sup> |
| 220677_s_at | ADAM metallopeptidase with thrombospondin type 1 motif, 8       | 0.48                              | 3.63x10 <sup>-3</sup> |
| 214964_at   | KIAA1856 protein                                                | 0.48                              | 1.86x10 <sup>-4</sup> |
| 209840_s_at | leucine rich repeat neuronal 3                                  | 0.48                              | 4.87x10 <sup>-4</sup> |
| 205102_at   | transmembrane protease, serine 2                                | 0.48                              | 7.63x10 <sup>-5</sup> |
| 220512_at   | deleted in liver cancer 1                                       | 0.48                              | 5.63x10 <sup>-4</sup> |
| 206290_s_at | regulator of G-protein signalling 7                             | 0.48                              | 6.20x10 <sup>-3</sup> |
| 208206_s_at | RAS guanyl releasing protein 2 (calcium and DAG-regulated)      | 0.48                              | 7.07x10 <sup>-4</sup> |
| 219095_at   | phospholipase A2, group IVB (cytosolic)                         | 0.48                              | 1.16x10 <sup>-5</sup> |
| 220369_at   | KIAA2010                                                        | 0.48                              | 9.82x10 <sup>-4</sup> |
| 213364_s_at | sorting nexin 1                                                 | 0.48                              | 1.20x10 <sup>-5</sup> |
| 215784_at   | CD1E antigen, e polypeptide                                     | 0.48                              | 7.58x10 <sup>-3</sup> |
| 204081_at   | neurogranin (protein kinase C substrate, RC3)                   | 0.47                              | 5.48x10 <sup>-4</sup> |
| 205906_at   | forkhead box J1                                                 | 0.47                              | 1.99x10 <sup>-4</sup> |
| 221602_s_at | Fas apoptotic inhibitory molecule 3                             | 0.47                              | 3.68x10 <sup>-3</sup> |
| 213121_at   | small nuclear ribonucleoprotein 70kDa polypeptide (RNP antigen) | 0.47                              | 4.85x10 <sup>-5</sup> |



**Supplemental Gene List III. Transcriptomal Differences between Basal Cell (BC)-high  
Adenocarcinoma (adenoCa) vs BC-low AdenoCa (cont. page 14)**

| Probe ID    | Gene name                                                                                        | BC-high adenoCa vs BC-low adenoCa |                       |
|-------------|--------------------------------------------------------------------------------------------------|-----------------------------------|-----------------------|
|             |                                                                                                  | Fold-change                       | p value               |
| 214249_at   | tripartite motif-containing 2                                                                    | 0.47                              | 3.58x10 <sup>-3</sup> |
| 215339_at   | natural killer-tumor recognition sequence                                                        | 0.47                              | 5.04x10 <sup>-3</sup> |
| 215578_at   | Gephyrin                                                                                         | 0.47                              | 4.42x10 <sup>-5</sup> |
| 221828_s_at | chromosome 9 open reading frame 28                                                               | 0.47                              | 7.68x10 <sup>-4</sup> |
| 222071_s_at | solute carrier organic anion transporter family, member 4C1                                      | 0.47                              | 1.16x10 <sup>-3</sup> |
| 205531_s_at | glutaminase 2 (liver, mitochondrial)                                                             | 0.47                              | 2.67x10 <sup>-3</sup> |
| 210258_at   | regulator of G-protein signalling 13                                                             | 0.47                              | 2.64x10 <sup>-4</sup> |
| 210528_at   | major histocompatibility complex, class I-related                                                | 0.47                              | 7.82x10 <sup>-5</sup> |
| 219197_s_at | signal peptide, CUB domain, EGF-like 2                                                           | 0.47                              | 2.93x10 <sup>-4</sup> |
| 221427_s_at | cyclin L2                                                                                        | 0.47                              | 8.87x10 <sup>-4</sup> |
| 210944_s_at | calpain 3, (p94)                                                                                 | 0.47                              | 6.18x10 <sup>-8</sup> |
| 39249_at    | aquaporin 3                                                                                      | 0.47                              | 7.01x10 <sup>-3</sup> |
| 207073_at   | cyclin-dependent kinase-like 2 (CDC2-related kinase)                                             | 0.47                              | 1.34x10 <sup>-3</sup> |
| 220150_s_at | chromosome 6 open reading frame 60                                                               | 0.47                              | 5.30x10 <sup>-8</sup> |
| 205101_at   | class II, major histocompatibility complex, transactivator                                       | 0.47                              | 3.60x10 <sup>-6</sup> |
| 212599_at   | autism susceptibility candidate 2                                                                | 0.47                              | 3.34x10 <sup>-4</sup> |
| 215474_at   | Chromosome 8 open reading frame 36                                                               | 0.47                              | 2.29x10 <sup>-3</sup> |
| 205343_at   | sulfotransferase family, cytosolic, 1C, member 1                                                 | 0.47                              | 1.94x10 <sup>-4</sup> |
| 210328_at   | glycine N-methyltransferase                                                                      | 0.46                              | 5.24x10 <sup>-4</sup> |
| 217929_s_at | KIAA0319-like                                                                                    | 0.46                              | 5.38x10 <sup>-3</sup> |
| 220220_at   | leucine rich repeat containing 37, member A4 (pseudogene)                                        | 0.46                              | 8.42x10 <sup>-5</sup> |
| 220296_at   | UDP-N-acetyl-alpha-D-galactosamine:polypeptide N-acetylgalactosaminyltransferase 10 (GalNAc-T10) | 0.46                              | 5.63x10 <sup>-5</sup> |
| 205464_at   | sodium channel, nonvoltage-gated 1, beta (Liddle syndrome)                                       | 0.46                              | 9.32x10 <sup>-5</sup> |
| 205978_at   | klotho                                                                                           | 0.46                              | 6.61x10 <sup>-5</sup> |
| 207896_s_at | deleted in lung and esophageal cancer 1                                                          | 0.46                              | 4.44x10 <sup>-4</sup> |
| 215800_at   | dual oxidase 1                                                                                   | 0.46                              | 2.48x10 <sup>-7</sup> |
| 204201_s_at | protein tyrosine phosphatase, non-receptor type 13 (APO-1/CD95 (Fas)-associated phosphatase)     | 0.46                              | 3.62x10 <sup>-5</sup> |
| 220187_at   | STEAP family member 4                                                                            | 0.46                              | 2.45x10 <sup>-3</sup> |
| 215785_s_at | cytoplasmic FMR1 interacting protein 2                                                           | 0.46                              | 1.77x10 <sup>-5</sup> |
| 215807_s_at | plexin B1                                                                                        | 0.45                              | 3.02x10 <sup>-3</sup> |
| 206007_at   | proteoglycan 4                                                                                   | 0.45                              | 1.10x10 <sup>-3</sup> |
| 215783_s_at | alkaline phosphatase, liver/bone/kidney                                                          | 0.45                              | 5.96x10 <sup>-4</sup> |
| 221874_at   | KIAA1324                                                                                         | 0.45                              | 1.31x10 <sup>-3</sup> |

**Supplemental Gene List III. Transcriptomal Differences between Basal Cell (BC)-high  
Adenocarcinoma (adenoCa) vs BC-low AdenoCa (cont. page 15)**

| Probe ID    | Gene name                                                                              | BC-high adenoCa vs BC-low adenoCa |                       |
|-------------|----------------------------------------------------------------------------------------|-----------------------------------|-----------------------|
|             |                                                                                        | Fold-change                       | p value               |
| 215147_at   | CUG triplet repeat, RNA binding protein 2                                              | 0.45                              | 5.43x10 <sup>-4</sup> |
| 206330_s_at | SHC (Src homology 2 domain containing) transforming protein 3                          | 0.45                              | 1.32x10 <sup>-4</sup> |
| 205414_s_at | KIAA0672 gene product                                                                  | 0.45                              | 2.59x10 <sup>-4</sup> |
| 220456_at   | chromosome 20 open reading frame 38                                                    | 0.45                              | 4.25x10 <sup>-4</sup> |
| 215782_at   | Ras-like GTPase-like                                                                   | 0.45                              | 3.82x10 <sup>-5</sup> |
| 208451_s_at | complement component 4A ; complement component 4B ; complement component 4B, telomeric | 0.44                              | 3.55x10 <sup>-5</sup> |
| 210239_at   | iroquois homeobox protein 5                                                            | 0.44                              | 6.24x10 <sup>-3</sup> |
| 220704_at   | zinc finger protein, subfamily 1A, 1 (Ikaros)                                          | 0.44                              | 3.35x10 <sup>-4</sup> |
| 214479_at   | GDNF family receptor alpha 3                                                           | 0.44                              | 8.89x10 <sup>-3</sup> |
| 221577_x_at | growth differentiation factor 15                                                       | 0.44                              | 4.81x10 <sup>-4</sup> |
| 207355_at   | solute carrier family 1 (glutamate transporter), member 7                              | 0.44                              | 4.76x10 <sup>-3</sup> |
| 204719_at   | ATP-binding cassette, sub-family A (ABC1), member 8                                    | 0.44                              | 9.32x10 <sup>-4</sup> |
| 210323_at   | tektin 2 (testicular)                                                                  | 0.44                              | 4.40x10 <sup>-5</sup> |
| 210084_x_at | tryptase alpha/beta 1                                                                  | 0.44                              | 6.43x10 <sup>-3</sup> |
| 203892_at   | WAP four-disulfide core domain 2                                                       | 0.44                              | 1.87x10 <sup>-3</sup> |
| 205839_s_at | benzodiazapine receptor (peripheral) associated protein 1                              | 0.43                              | 1.88x10 <sup>-8</sup> |
| 215575_at   | phosphodiesterase 4D interacting protein (myomegalin)                                  | 0.43                              | 3.73x10 <sup>-4</sup> |
| 220061_at   | acyl-CoA synthetase medium-chain family member 5                                       | 0.43                              | 5.08x10 <sup>-5</sup> |
| 209368_at   | epoxide hydrolase 2, cytoplasmic                                                       | 0.43                              | 5.18x10 <sup>-4</sup> |
| 213106_at   | ATPase, aminophospholipid transporter (APLT), Class I, type 8A, member 1               | 0.43                              | 2.46x10 <sup>-6</sup> |
| 204124_at   | solute carrier family 34 (sodium phosphate), member 2                                  | 0.43                              | 1.27x10 <sup>-3</sup> |
| 219230_at   | transmembrane protein 100                                                              | 0.43                              | 6.47x10 <sup>-4</sup> |
| 206019_at   | RNA binding motif protein 19                                                           | 0.43                              | 8.43x10 <sup>-4</sup> |
| 218087_s_at | sorbin and SH3 domain containing 1                                                     | 0.42                              | 7.51x10 <sup>-4</sup> |
| 220055_at   | zinc finger protein 287                                                                | 0.42                              | 2.42x10 <sup>-4</sup> |
| 214602_at   | collagen, type IV, alpha 4                                                             | 0.42                              | 3.32x10 <sup>-3</sup> |
| 219857_at   | chromosome 10 open reading frame 81                                                    | 0.42                              | 5.92x10 <sup>-3</sup> |
| 214188_at   | Hexamethylene bis-acetamide inducible 1                                                | 0.42                              | 2.52x10 <sup>-4</sup> |
| 221272_s_at | chromosome 1 open reading frame 21                                                     | 0.42                              | 4.26x10 <sup>-5</sup> |
| 222073_at   | collagen, type IV, alpha 3 (Goodpasture antigen)                                       | 0.42                              | 1.40x10 <sup>-5</sup> |
| 206255_at   | B lymphoid tyrosine kinase                                                             | 0.42                              | 1.91x10 <sup>-3</sup> |
| 212448_at   | neural precursor cell expressed, developmentally down-regulated 4-like                 | 0.42                              | 6.51x10 <sup>-6</sup> |
| 205500_at   | complement component 5                                                                 | 0.42                              | 5.83x10 <sup>-4</sup> |
| 205776_at   | flavin containing monooxygenase 5                                                      | 0.42                              | 3.98x10 <sup>-4</sup> |

**Supplemental Gene List III. Transcriptomal Differences between Basal Cell (BC)-high  
Adenocarcinoma (adenoCa) vs BC-low AdenoCa (cont. page 16)**

| Probe ID    | Gene name                                                                                                    | BC-high adenoCa vs BC-low adenoCa |                       |
|-------------|--------------------------------------------------------------------------------------------------------------|-----------------------------------|-----------------------|
|             |                                                                                                              | Fold-change                       | p value               |
| 207837_at   | RNA binding protein with multiple splicing                                                                   | 0.41                              | 2.66x10 <sup>-5</sup> |
| 205569_at   | lysosomal-associated membrane protein 3                                                                      | 0.41                              | 4.24x10 <sup>-4</sup> |
| 208434_at   | myelodysplasia syndrome 1                                                                                    | 0.41                              | 3.71x10 <sup>-4</sup> |
| 213802_at   | Protease, serine, 12 (neurotrypsin, motopsin)                                                                | 0.41                              | 2.91x10 <sup>-3</sup> |
| 203911_at   | RAP1, GTPase activating protein 1                                                                            | 0.41                              | 6.49x10 <sup>-6</sup> |
| 204428_s_at | lecithin-cholesterol acyltransferase                                                                         | 0.41                              | 8.18x10 <sup>-4</sup> |
| 209793_at   | glutamate receptor, ionotropic, AMPA 1                                                                       | 0.41                              | 2.85x10 <sup>-5</sup> |
| 204865_at   | carbonic anhydrase III, muscle specific                                                                      | 0.41                              | 2.76x10 <sup>-5</sup> |
| 205200_at   | C-type lectin domain family 3, member B                                                                      | 0.41                              | 3.50x10 <sup>-4</sup> |
| 205883_at   | zinc finger and BTB domain containing 16                                                                     | 0.41                              | 1.15x10 <sup>-5</sup> |
| 216134_at   | FERM domain containing 4B                                                                                    | 0.41                              | 3.37x10 <sup>-5</sup> |
| 215921_at   | polycystic kidney disease 1 (autosomal dominant)<br>pseudogene 1                                             | 0.41                              | 2.16x10 <sup>-4</sup> |
| 214890_s_at | DKFZP564J102 protein                                                                                         | 0.40                              | 1.53x10 <sup>-3</sup> |
| 220858_at   | sorbin and SH3 domain containing 2                                                                           | 0.40                              | 8.72x10 <sup>-5</sup> |
| 220889_s_at | carbonic anhydrase X                                                                                         | 0.40                              | 3.47x10 <sup>-3</sup> |
| 40284_at    | forkhead box A2                                                                                              | 0.40                              | 3.11x10 <sup>-3</sup> |
| 209763_at   | chordin-like 1                                                                                               | 0.40                              | 1.04x10 <sup>-5</sup> |
| 210113_s_at | NACHT, leucine rich repeat and PYD (pyrin domain)<br>containing 1                                            | 0.40                              | 6.28x10 <sup>-5</sup> |
| 210571_s_at | cytidine monophosphate-N-acetylneuraminic acid<br>hydroxylase (CMP-N-acetylneuraminic acid<br>monooxygenase) | 0.40                              | 1.16x10 <sup>-5</sup> |
| 207569_at   | v-ros UR2 sarcoma virus oncogene homolog 1 (avian)                                                           | 0.40                              | 8.83x10 <sup>-6</sup> |
| 220624_s_at | E74-like factor 5 (ets domain transcription factor)                                                          | 0.40                              | 7.35x10 <sup>-3</sup> |
| 203548_s_at | lipoprotein lipase                                                                                           | 0.40                              | 5.67x10 <sup>-3</sup> |
| 215355_at   | POU domain, class 2, transcription factor 3                                                                  | 0.39                              | 2.79x10 <sup>-3</sup> |
| 219525_at   | solute carrier family 47, member 1                                                                           | 0.39                              | 7.03x10 <sup>-3</sup> |
| 206010_at   | hyaluronan binding protein 2                                                                                 | 0.39                              | 5.74x10 <sup>-5</sup> |
| 206069_s_at | acyl-Coenzyme A dehydrogenase, long chain                                                                    | 0.39                              | 6.26x10 <sup>-4</sup> |
| 213493_at   | sushi, nidogen and EGF-like domains 1                                                                        | 0.39                              | 1.00x10 <sup>-4</sup> |
| 217418_x_at | membrane-spanning 4-domains, subfamily A, member 1                                                           | 0.39                              | 1.07x10 <sup>-5</sup> |
| 201497_x_at | myosin, heavy polypeptide 11, smooth muscle                                                                  | 0.39                              | 8.38x10 <sup>-3</sup> |
| 215184_at   | death-associated protein kinase 2                                                                            | 0.39                              | 1.55x10 <sup>-6</sup> |
| 205969_at   | arylacetamide deacetylase (esterase)                                                                         | 0.39                              | 6.26x10 <sup>-3</sup> |
| 201785_at   | ribonuclease, RNase A family, 1 (pancreatic)                                                                 | 0.38                              | 3.94x10 <sup>-5</sup> |
| 212695_at   | cryptochrome 2 (photolyase-like)                                                                             | 0.38                              | 1.47x10 <sup>-5</sup> |
| 220630_s_at | chitinase, acidic                                                                                            | 0.38                              | 4.52x10 <sup>-5</sup> |

**Supplemental Gene List III. Transcriptomal Differences between Basal Cell (BC)-high  
Adenocarcinoma (adenoCa) vs BC-low AdenoCa (cont. page 17)**

| Probe ID    | Gene name                                                                                                                                                                                    | BC-high adenoCa vs BC-low adenoCa |                       |
|-------------|----------------------------------------------------------------------------------------------------------------------------------------------------------------------------------------------|-----------------------------------|-----------------------|
|             |                                                                                                                                                                                              | Fold-change                       | p value               |
| 208791_at   | clusterin (complement lysis inhibitor, SP-40,40, sulfated glycoprotein 2, testosterone-repressed prostate message 2, apolipoprotein J)                                                       | 0.38                              | 1.56x10 <sup>-3</sup> |
| 216468_s_at | zinc finger protein 682                                                                                                                                                                      | 0.38                              | 1.78x10 <sup>-4</sup> |
| 201525_at   | apolipoprotein D                                                                                                                                                                             | 0.38                              | 2.09x10 <sup>-4</sup> |
| 203638_s_at | fibroblast growth factor receptor 2 (bacteria-expressed kinase, keratinocyte growth factor receptor, craniofacial dysostosis 1, Crouzon syndrome, Pfeiffer syndrome, Jackson-Weiss syndrome) | 0.38                              | 1.03x10 <sup>-3</sup> |
| 202295_s_at | cathepsin H                                                                                                                                                                                  | 0.37                              | 3.27x10 <sup>-8</sup> |
| 208609_s_at | tenascin XA pseudogene ; tenascin XB                                                                                                                                                         | 0.37                              | 3.61x10 <sup>-7</sup> |
| 220269_at   | zinc finger, B-box domain containing                                                                                                                                                         | 0.37                              | 1.66x10 <sup>-3</sup> |
| 215563_s_at | macrophage stimulating, pseudogene 9                                                                                                                                                         | 0.37                              | 5.89x10 <sup>-6</sup> |
| 220156_at   | EF-hand calcium binding domain 1                                                                                                                                                             | 0.37                              | 2.05x10 <sup>-4</sup> |
| 202992_at   | complement component 7                                                                                                                                                                       | 0.37                              | 2.48x10 <sup>-3</sup> |
| 203924_at   | glutathione S-transferase A1                                                                                                                                                                 | 0.36                              | 3.27x10 <sup>-3</sup> |
| 214774_x_at | trinucleotide repeat containing 9                                                                                                                                                            | 0.36                              | 2.30x10 <sup>-3</sup> |
| 204487_s_at | potassium voltage-gated channel, KQT-like subfamily, member 1                                                                                                                                | 0.36                              | 2.36x10 <sup>-3</sup> |
| 214203_s_at | proline dehydrogenase (oxidase) 1                                                                                                                                                            | 0.36                              | 3.84x10 <sup>-4</sup> |
| 37004_at    | surfactant, pulmonary-associated protein B                                                                                                                                                   | 0.36                              | 2.08x10 <sup>-3</sup> |
| 220622_at   | leucine rich repeat containing 31                                                                                                                                                            | 0.36                              | 2.35x10 <sup>-3</sup> |
| 205591_at   | olfactomedin 1                                                                                                                                                                               | 0.35                              | 1.82x10 <sup>-3</sup> |
| 209460_at   | 4-aminobutyrate aminotransferase                                                                                                                                                             | 0.35                              | 1.14x10 <sup>-7</sup> |
| 215350_at   | spectrin repeat containing, nuclear envelope 1                                                                                                                                               | 0.35                              | 1.24x10 <sup>-5</sup> |
| 208606_s_at | wingless-type MMTV integration site family, member 4                                                                                                                                         | 0.34                              | 1.31x10 <sup>-4</sup> |
| 217133_x_at | cytochrome P450, family 2, subfamily B, polypeptide 6                                                                                                                                        | 0.34                              | 1.26x10 <sup>-6</sup> |
| 213317_at   | Chloride intracellular channel 5                                                                                                                                                             | 0.34                              | 2.41x10 <sup>-4</sup> |
| 216373_at   | transmembrane anterior posterior transformation 1                                                                                                                                            | 0.34                              | 2.53x10 <sup>-5</sup> |
| 210119_at   | potassium inwardly-rectifying channel, subfamily J, member 15                                                                                                                                | 0.34                              | 5.34x10 <sup>-5</sup> |
| 205654_at   | complement component 4 binding protein, alpha                                                                                                                                                | 0.34                              | 1.52x10 <sup>-3</sup> |
| 208250_s_at | deleted in malignant brain tumors 1                                                                                                                                                          | 0.34                              | 2.64x10 <sup>-4</sup> |
| 204437_s_at | folate receptor 1 (adult)                                                                                                                                                                    | 0.34                              | 8.16x10 <sup>-5</sup> |
| 206651_s_at | carboxypeptidase B2 (plasma, carboxypeptidase U)                                                                                                                                             | 0.34                              | 7.41x10 <sup>-4</sup> |
| 211024_s_at | thyroid transcription factor 1 ; thyroid transcription factor 1                                                                                                                              | 0.33                              | 3.30x10 <sup>-4</sup> |
| 204424_s_at | LIM domain only 3 (rhombotin-like 2)                                                                                                                                                         | 0.32                              | 2.09x10 <sup>-5</sup> |

**Supplemental Gene List III. Transcriptomal Differences between Basal Cell (BC)-high  
Adenocarcinoma (adenoCa) vs BC-low AdenoCa (cont. page 18)**

| Probe ID    | Gene name                                                                                                                                                            | BC-high adenoCa vs BC-low adenoCa |                       |
|-------------|----------------------------------------------------------------------------------------------------------------------------------------------------------------------|-----------------------------------|-----------------------|
|             |                                                                                                                                                                      | Fold-change                       | p value               |
| 216000_at   | KIAA0484 protein                                                                                                                                                     | 0.32                              | 2.09x10 <sup>-6</sup> |
| 218922_s_at | LAG1 longevity assurance homolog 4 (S. cerevisiae)                                                                                                                   | 0.32                              | 3.99x10 <sup>-5</sup> |
| 215559_at   | ATP-binding cassette, sub-family C (CFTR/MRP), member 6                                                                                                              | 0.32                              | 1.13x10 <sup>-5</sup> |
| 205216_s_at | apolipoprotein H (beta-2-glycoprotein I)                                                                                                                             | 0.32                              | 4.66x10 <sup>-6</sup> |
| 206742_at   | c-fos induced growth factor (vascular endothelial growth factor D)                                                                                                   | 0.32                              | 3.76x10 <sup>-6</sup> |
| 204343_at   | ATP-binding cassette, sub-family A (ABC1), member 3                                                                                                                  | 0.32                              | 7.82x10 <sup>-5</sup> |
| 218835_at   | surfactant, pulmonary-associated protein A2                                                                                                                          | 0.32                              | 3.10x10 <sup>-3</sup> |
| 209614_at   | alcohol dehydrogenase 1A (class I), alpha polypeptide ; alcohol dehydrogenase IB (class I), beta polypeptide ; alcohol dehydrogenase 1C (class I), gamma polypeptide | 0.32                              | 4.05x10 <sup>-6</sup> |
| 210081_at   | advanced glycosylation end product-specific receptor                                                                                                                 | 0.31                              | 9.00x10 <sup>-5</sup> |
| 212951_at   | G protein-coupled receptor 116                                                                                                                                       | 0.31                              | 5.63x10 <sup>-7</sup> |
| 208335_s_at | Duffy blood group                                                                                                                                                    | 0.31                              | 1.86x10 <sup>-3</sup> |
| 205496_at   | KIAA0408                                                                                                                                                             | 0.31                              | 6.32x10 <sup>-6</sup> |
| 204379_s_at | fibroblast growth factor receptor 3 (achondroplasia, thanatophoric dwarfism)                                                                                         | 0.31                              | 4.39x10 <sup>-4</sup> |
| 205489_at   | crystallin, mu                                                                                                                                                       | 0.31                              | 2.48x10 <sup>-7</sup> |
| 215554_at   | glycosylphosphatidylinositol specific phospholipase D1                                                                                                               | 0.31                              | 2.76x10 <sup>-5</sup> |
| 204213_at   | polymeric immunoglobulin receptor                                                                                                                                    | 0.31                              | 6.39x10 <sup>-7</sup> |
| 213451_x_at | tenascin XB                                                                                                                                                          | 0.30                              | 2.04x10 <sup>-6</sup> |
| 221646_s_at | zinc finger, DHHC-type containing 11                                                                                                                                 | 0.30                              | 7.68x10 <sup>-9</sup> |
| 205544_s_at | complement component (3d/Epstein Barr virus) receptor 2                                                                                                              | 0.30                              | 4.88x10 <sup>-4</sup> |
| 205987_at   | CD1C antigen, c polypeptide                                                                                                                                          | 0.29                              | 1.62x10 <sup>-4</sup> |
| 210121_at   | UDP-Gal:betaGlcNAc beta 1,3-galactosyltransferase, polypeptide 2                                                                                                     | 0.29                              | 3.84x10 <sup>-4</sup> |
| 209904_at   | troponin C type 1 (slow)                                                                                                                                             | 0.29                              | 1.12x10 <sup>-3</sup> |
| 205043_at   | cystic fibrosis transmembrane conductance regulator, ATP-binding cassette (sub-family C, member 7)                                                                   | 0.29                              | 4.57x10 <sup>-4</sup> |
| 214433_s_at | selenium binding protein 1 ; selenium binding protein 1                                                                                                              | 0.28                              | 1.02x10 <sup>-9</sup> |
| 205614_x_at | macrophage stimulating 1 (hepatocyte growth factor-like)                                                                                                             | 0.27                              | 1.91x10 <sup>-8</sup> |
| 204754_at   | Hepatic leukemia factor                                                                                                                                              | 0.27                              | 3.95x10 <sup>-6</sup> |
| 210382_at   | secretin receptor                                                                                                                                                    | 0.26                              | 9.21x10 <sup>-7</sup> |
| 210067_at   | aquaporin 4                                                                                                                                                          | 0.26                              | 3.20x10 <sup>-3</sup> |
| 205576_at   | serpin peptidase inhibitor, clade D (heparin cofactor), member 1                                                                                                     | 0.25                              | 2.85x10 <sup>-4</sup> |
| 220003_at   | leucine rich repeat containing 36                                                                                                                                    | 0.25                              | 2.33x10 <sup>-6</sup> |

**Supplemental Gene List III. Transcriptomal Differences between Basal Cell (BC)-high  
Adenocarcinoma (adenoCa) vs BC-low AdenoCa (cont. page 19)**

| Probe ID    | Gene name                                                                                                                                                     | BC-high adenoCa vs BC-low adenoCa |                        |
|-------------|---------------------------------------------------------------------------------------------------------------------------------------------------------------|-----------------------------------|------------------------|
|             |                                                                                                                                                               | Fold-change                       | p value                |
| 205700_at   | hydroxysteroid (17-beta) dehydrogenase 6                                                                                                                      | 0.25                              | 7.40x10 <sup>-6</sup>  |
| 219476_at   | chromosome 1 open reading frame 116                                                                                                                           | 0.25                              | 4.04x10 <sup>-5</sup>  |
| 206311_s_at | phospholipase A2, group IB (pancreas)                                                                                                                         | 0.24                              | 2.21x10 <sup>-6</sup>  |
| 221132_at   | claudin 18                                                                                                                                                    | 0.24                              | 2.72x10 <sup>-3</sup>  |
| 208498_s_at | amylase, alpha 1A; salivary ; amylase, alpha 1B; salivary ;<br>amylase, alpha 1C; salivary ; amylase, alpha 2A;<br>pancreatic ; amylase, alpha 2B; pancreatic | 0.23                              | 5.94x10 <sup>-7</sup>  |
| 38691_s_at  | surfactant, pulmonary-associated protein C                                                                                                                    | 0.23                              | 9.97x10 <sup>-5</sup>  |
| 205185_at   | serine peptidase inhibitor, Kazal type 5                                                                                                                      | 0.22                              | 4.68x10 <sup>-5</sup>  |
| 205979_at   | secretoglobin, family 2A, member 1                                                                                                                            | 0.22                              | 2.15x10 <sup>-3</sup>  |
| 209613_s_at | alcohol dehydrogenase IB (class I), beta polypeptide                                                                                                          | 0.21                              | 3.81x10 <sup>-5</sup>  |
| 205261_at   | progastricsin (pepsinogen C)                                                                                                                                  | 0.19                              | 1.97x10 <sup>-5</sup>  |
| 205725_at   | secretoglobin, family 1A, member 1 (uteroglobin)                                                                                                              | 0.18                              | 3.28x10 <sup>-4</sup>  |
| 210550_s_at | Ras protein-specific guanine nucleotide-releasing factor 1                                                                                                    | 0.18                              | 1.05x10 <sup>-5</sup>  |
| 210272_at   | cytochrome P450, family 2, subfamily B, polypeptide 7<br>pseudogene 1                                                                                         | 0.18                              | 1.44x10 <sup>-7</sup>  |
| 204811_s_at | calcium channel, voltage-dependent, alpha 2/delta subunit<br>2                                                                                                | 0.17                              | 9.25x10 <sup>-12</sup> |
| 214199_at   | surfactant, pulmonary-associated protein D                                                                                                                    | 0.17                              | 1.25x10 <sup>-5</sup>  |
| 218876_at   | brain specific protein                                                                                                                                        | 0.16                              | 6.58x10 <sup>-7</sup>  |
| 204712_at   | WNT inhibitory factor 1                                                                                                                                       | 0.14                              | 1.37x10 <sup>-5</sup>  |
| 210096_at   | cytochrome P450, family 4, subfamily B, polypeptide 1                                                                                                         | 0.10                              | 2.81x10 <sup>-9</sup>  |

**Supplemental Gene List IV. Transcriptomal Differences between Lung Adenocarcinoma  
(adenoCa) Patients with Poor Survival vs Those with Good Survival**

| Probe ID    | Gene name                                                                                        | OS<2yr vs OS>5yr in<br>adenoCa |                       | Airway<br>BC<br>signature |
|-------------|--------------------------------------------------------------------------------------------------|--------------------------------|-----------------------|---------------------------|
|             |                                                                                                  | Fold-<br>change                | p value               |                           |
| 37892_at    | collagen, type XI, alpha 1                                                                       | 5.62                           | 3.33x10 <sup>-2</sup> |                           |
| 219491_at   | leucine rich repeat and fibronectin type III domain<br>containing 4                              | 3.73                           | 3.59x10 <sup>-2</sup> |                           |
| 218468_s_at | gremlin 1, cysteine knot superfamily, homolog<br>(Xenopus laevis)                                | 3.68                           | 3.69x10 <sup>-2</sup> |                           |
| 205403_at   | interleukin 1 receptor, type II                                                                  | 3.64                           | 7.12x10 <sup>-3</sup> |                           |
| 219918_s_at | asp (abnormal spindle)-like, microcephaly<br>associated (Drosophila)                             | 3.14                           | 4.06x10 <sup>-2</sup> |                           |
| 209825_s_at | uridine-cytidine kinase 2                                                                        | 3.09                           | 2.01x10 <sup>-2</sup> | O                         |
| 209875_s_at | secreted phosphoprotein 1 (osteopontin, bone<br>sialoprotein I, early T-lymphocyte activation 1) | 2.95                           | 1.67x10 <sup>-2</sup> |                           |
| 201890_at   | ribonucleotide reductase M2 polypeptide                                                          | 2.94                           | 4.26x10 <sup>-2</sup> |                           |
| 218542_at   | chromosome 10 open reading frame 3                                                               | 2.94                           | 4.06x10 <sup>-2</sup> |                           |
| 209900_s_at | solute carrier family 16 (monocarboxylic acid<br>transporters), member 1                         | 2.93                           | 3.00x10 <sup>-2</sup> |                           |
| 212396_s_at | KIAA0090                                                                                         | 2.82                           | 3.69x10 <sup>-2</sup> |                           |
| 204641_at   | NIMA (never in mitosis gene a)-related kinase 2                                                  | 2.76                           | 3.09x10 <sup>-2</sup> |                           |
| 212353_at   | sulfatase 1                                                                                      | 2.74                           | 2.29x10 <sup>-2</sup> |                           |
| 213338_at   | Ras-induced senescence 1                                                                         | 2.68                           | 3.15x10 <sup>-2</sup> | O                         |
| 202855_s_at | solute carrier family 16 (monocarboxylic acid<br>transporters), member 3                         | 2.67                           | 2.86x10 <sup>-2</sup> | O                         |
| 205568_at   | aquaporin 9                                                                                      | 2.65                           | 3.80x10 <sup>-2</sup> |                           |
| 205542_at   | six transmembrane epithelial antigen of the prostate<br>1                                        | 2.55                           | 3.15x10 <sup>-2</sup> |                           |
| 217553_at   | similar to Six transmembrane epithelial antigen of<br>prostate                                   | 2.55                           | 2.86x10 <sup>-2</sup> | O                         |
| 202363_at   | sparc/osteonectin, cwcv and kazal-like domains<br>proteoglycan (testican)                        | 2.54                           | 2.90x10 <sup>-2</sup> |                           |
| 203362_s_at | MAD2 mitotic arrest deficient-like 1 (yeast)                                                     | 2.53                           | 4.21x10 <sup>-2</sup> |                           |
| 202580_x_at | forkhead box M1                                                                                  | 2.52                           | 5.93x10 <sup>-3</sup> |                           |
| 201037_at   | phosphofructokinase, platelet                                                                    | 2.51                           | 2.57x10 <sup>-2</sup> |                           |
| 210809_s_at | periostin, osteoblast specific factor                                                            | 2.49                           | 4.88x10 <sup>-2</sup> |                           |
| 213008_at   | hypothetical protein FLJ10719                                                                    | 2.48                           | 2.14x10 <sup>-2</sup> |                           |
| 203213_at   | Cell division cycle 2, G1 to S and G2 to M                                                       | 2.46                           | 4.08x10 <sup>-2</sup> |                           |

**Supplemental Gene List IV. Transcriptomal Differences between Lung Adenocarcinoma (adenoCa) Patients with Poor Survival vs Those with Good Survival (cont. page 2)**

| Probe ID    | Gene name                                                                                                                                   | OS<2yr vs OS>5yr in adenoCa |                       | Airway BC signature |
|-------------|---------------------------------------------------------------------------------------------------------------------------------------------|-----------------------------|-----------------------|---------------------|
|             |                                                                                                                                             | Fold-change                 | p value               |                     |
| 215812_s_at | solute carrier family 6 (neurotransmitter transporter, creatine), member 8 ; similar to sodium- and chloride-dependent creatine transporter | 2.42                        | 4.04x10 <sup>-2</sup> | O                   |
| 212992_at   | chromosome 14 open reading frame 78                                                                                                         | 2.40                        | 2.57x10 <sup>-2</sup> | O                   |
| 204825_at   | maternal embryonic leucine zipper kinase                                                                                                    | 2.38                        | 4.21x10 <sup>-2</sup> |                     |
| 210052_s_at | TPX2, microtubule-associated, homolog (Xenopus laevis)                                                                                      | 2.38                        | 2.39x10 <sup>-2</sup> |                     |
| 218663_at   | chromosome condensation protein G                                                                                                           | 2.36                        | 3.04x10 <sup>-2</sup> |                     |
| 202828_s_at | matrix metalloproteinase 14 (membrane-inserted)                                                                                             | 2.35                        | 3.00x10 <sup>-2</sup> |                     |
| 201291_s_at | topoisomerase (DNA) II alpha 170kDa                                                                                                         | 2.33                        | 2.32x10 <sup>-2</sup> |                     |
| 217901_at   | Desmoglein 2                                                                                                                                | 2.33                        | 3.82x10 <sup>-3</sup> | O                   |
| 202094_at   | baculoviral IAP repeat-containing 5 (survivin)                                                                                              | 2.32                        | 3.15x10 <sup>-2</sup> |                     |
| 218843_at   | fibronectin type III domain containing 4                                                                                                    | 2.31                        | 2.65x10 <sup>-2</sup> |                     |
| 201506_at   | transforming growth factor, beta-induced, 68kDa                                                                                             | 2.27                        | 1.51x10 <sup>-2</sup> | O                   |
| 202949_s_at | four and a half LIM domains 2                                                                                                               | 2.24                        | 4.22x10 <sup>-2</sup> | O                   |
| 204750_s_at | desmocollin 2                                                                                                                               | 2.23                        | 2.90x10 <sup>-2</sup> | O                   |
| 205393_s_at | CHK1 checkpoint homolog (S. pombe)                                                                                                          | 2.22                        | 4.06x10 <sup>-2</sup> | O                   |
| 210132_at   | ephrin-A3                                                                                                                                   | 2.22                        | 2.14x10 <sup>-2</sup> |                     |
| 206026_s_at | tumor necrosis factor, alpha-induced protein 6                                                                                              | 2.21                        | 2.29x10 <sup>-2</sup> |                     |
| 218726_at   | hypothetical protein DKFZp762E1312                                                                                                          | 2.21                        | 4.26x10 <sup>-2</sup> |                     |
| 218355_at   | kinesin family member 4A                                                                                                                    | 2.19                        | 3.15x10 <sup>-2</sup> |                     |
| 203806_s_at | Fanconi anemia, complementation group A ; Fanconi anemia, complementation group A                                                           | 2.17                        | 3.15x10 <sup>-2</sup> |                     |
| 218644_at   | pleckstrin 2                                                                                                                                | 2.17                        | 2.29x10 <sup>-2</sup> | O                   |
| 204444_at   | kinesin family member 11                                                                                                                    | 2.16                        | 3.15x10 <sup>-2</sup> |                     |
| 204620_s_at | chondroitin sulfate proteoglycan 2 (versican)                                                                                               | 2.16                        | 3.98x10 <sup>-2</sup> |                     |
| 215723_s_at | phospholipase D1, phosphatidylcholine-specific                                                                                              | 2.15                        | 3.80x10 <sup>-2</sup> |                     |
| 204146_at   | RAD51 associated protein 1                                                                                                                  | 2.14                        | 3.15x10 <sup>-2</sup> |                     |
| 218585_s_at | denticleless homolog (Drosophila)                                                                                                           | 2.14                        | 4.02x10 <sup>-2</sup> |                     |
| 202998_s_at | lysyl oxidase-like 2                                                                                                                        | 2.11                        | 2.14x10 <sup>-2</sup> | O                   |
| 203418_at   | cyclin A2                                                                                                                                   | 2.08                        | 4.49x10 <sup>-2</sup> |                     |
| 212242_at   | tubulin, alpha 1 (testis specific)                                                                                                          | 2.08                        | 2.29x10 <sup>-2</sup> | O                   |
| 220658_s_at | aryl hydrocarbon receptor nuclear translocator-like 2                                                                                       | 2.08                        | 4.21x10 <sup>-2</sup> | O                   |



**Supplemental Gene List IV. Transcriptomal Differences between Lung Adenocarcinoma (adenoCa) Patients with Poor Survival vs Those with Good Survival (cont. page 3)**

| Probe ID    | Gene name                                                                                 | OS<2yr vs OS>5yr in adenoCa |                       | Airway BC signature |
|-------------|-------------------------------------------------------------------------------------------|-----------------------------|-----------------------|---------------------|
|             |                                                                                           | Fold-change                 | p value               |                     |
| 213943_at   | twist homolog 1 (acrocephalosyndactyly 3; Saethre-Chotzen syndrome) ( <i>Drosophila</i> ) | 2.07                        | 2.29x10 <sup>-2</sup> |                     |
| 218009_s_at | protein regulator of cytokinesis 1                                                        | 2.07                        | 2.29x10 <sup>-2</sup> |                     |
| 220002_at   | hypothetical protein FLJ10157                                                             | 2.06                        | 4.08x10 <sup>-2</sup> |                     |
| 214702_at   | fibronectin 1                                                                             | 2.02                        | 2.94x10 <sup>-2</sup> | O                   |
| 215076_s_at | collagen, type III, alpha 1 (Ehlers-Danlos syndrome type IV, autosomal dominant)          | 2.02                        | 4.02x10 <sup>-2</sup> |                     |
| 205066_s_at | ectonucleotide pyrophosphatase/phosphodiesterase 1                                        | 2.00                        | 2.29x10 <sup>-2</sup> |                     |
| 209955_s_at | fibroblast activation protein, alpha                                                      | 2.00                        | 4.10x10 <sup>-2</sup> |                     |
| 210074_at   | cathepsin L2                                                                              | 2.00                        | 3.15x10 <sup>-2</sup> | O                   |
| 219978_s_at | nucleolar and spindle associated protein 1                                                | 2.00                        | 4.72x10 <sup>-2</sup> |                     |
| 204237_at   | GULP, engulfment adaptor PTB domain containing 1                                          | 1.98                        | 3.51x10 <sup>-2</sup> |                     |
| 204962_s_at | centromere protein A, 17kDa                                                               | 1.98                        | 4.94x10 <sup>-2</sup> |                     |
| 219888_at   | sperm associated antigen 4                                                                | 1.97                        | 3.15x10 <sup>-2</sup> |                     |
| 210845_s_at | plasminogen activator, urokinase receptor                                                 | 1.96                        | 3.15x10 <sup>-2</sup> |                     |
| 222077_s_at | Rac GTPase activating protein 1                                                           | 1.93                        | 2.57x10 <sup>-2</sup> |                     |
| 217744_s_at | PERP, TP53 apoptosis effector                                                             | 1.93                        | 2.14x10 <sup>-2</sup> |                     |
| 219032_x_at | opsin 3 (encephalopsin, panopsin)                                                         | 1.93                        | 3.33x10 <sup>-2</sup> | O                   |
| 206364_at   | kinesin family member 14                                                                  | 1.92                        | 2.14x10 <sup>-2</sup> |                     |
| 204531_s_at | breast cancer 1, early onset                                                              | 1.92                        | 4.88x10 <sup>-2</sup> |                     |
| 204342_at   | solute carrier family 25 (mitochondrial carrier; phosphate carrier), member 24            | 1.90                        | 3.00x10 <sup>-2</sup> |                     |
| 205122_at   | transmembrane protein with EGF-like and two follistatin-like domains 1                    | 1.89                        | 3.15x10 <sup>-2</sup> | O                   |
| 208079_s_at | serine/threonine kinase 6                                                                 | 1.88                        | 3.15x10 <sup>-2</sup> |                     |
| 202887_s_at | DNA-damage-inducible transcript 4                                                         | 1.86                        | 4.08x10 <sup>-2</sup> |                     |
| 205574_x_at | bone morphogenetic protein 1                                                              | 1.81                        | 4.26x10 <sup>-2</sup> |                     |
| 201669_s_at | myristoylated alanine-rich protein kinase C substrate                                     | 1.81                        | 4.29x10 <sup>-2</sup> |                     |
| 213125_at   | olfactomedin-like 2B                                                                      | 1.81                        | 4.92x10 <sup>-2</sup> |                     |
| 219366_at   | apoptosis, caspase activation inhibitor                                                   | 1.80                        | 3.15x10 <sup>-2</sup> | O                   |
| 204298_s_at | lysyl oxidase                                                                             | 1.79                        | 2.39x10 <sup>-2</sup> |                     |
| 45633_at    | hypothetical protein FLJ13912                                                             | 1.79                        | 3.00x10 <sup>-2</sup> |                     |
| 209642_at   | BUB1 budding uninhibited by benzimidazoles 1 homolog (yeast)                              | 1.78                        | 3.00x10 <sup>-2</sup> |                     |

**Supplemental Gene List IV. Transcriptomal Differences between Lung Adenocarcinoma (adenoCa) Patients with Poor Survival vs Those with Good Survival (cont. page 4)**

| Probe ID                  | Gene name                                                                                             | OS<2yr vs OS>5yr in adenoCa |                       | Airway BC signature |
|---------------------------|-------------------------------------------------------------------------------------------------------|-----------------------------|-----------------------|---------------------|
|                           |                                                                                                       | Fold-change                 | p value               |                     |
| 203755_at                 | BUB1 budding uninhibited by benzimidazoles 1 homolog beta (yeast)                                     | 1.78                        | 4.26x10 <sup>-2</sup> |                     |
| 203414_at                 | monocyte to macrophage differentiation-associated                                                     | 1.77                        | 4.02x10 <sup>-2</sup> | O                   |
| 201930_at                 | MCM6 minichromosome maintenance deficient 6 (MIS5 homolog, <i>S. pombe</i> ) ( <i>S. cerevisiae</i> ) | 1.77                        | 2.29x10 <sup>-2</sup> |                     |
| 222118_at                 | uncharacterized bone marrow protein BM039                                                             | 1.77                        | 3.46x10 <sup>-2</sup> |                     |
| 201250_s_at               | solute carrier family 2 (facilitated glucose transporter), member 1                                   | 1.76                        | 3.15x10 <sup>-2</sup> |                     |
| 204244_s_at               | activator of S phase kinase                                                                           | 1.76                        | 2.69x10 <sup>-2</sup> | O                   |
| 201202_at                 | proliferating cell nuclear antigen                                                                    | 1.75                        | 2.01x10 <sup>-2</sup> |                     |
| 203358_s_at               | enhancer of zeste homolog 2 ( <i>Drosophila</i> )                                                     | 1.75                        | 3.15x10 <sup>-2</sup> |                     |
| 200737_at                 | phosphoglycerate kinase 1                                                                             | 1.74                        | 1.67x10 <sup>-2</sup> |                     |
| 202087_s_at               | cathepsin L                                                                                           | 1.73                        | 4.06x10 <sup>-2</sup> |                     |
| 218349_s_at               | Zwilch, kinetochore associated, homolog ( <i>Drosophila</i> )                                         | 1.73                        | 3.96x10 <sup>-2</sup> |                     |
| 221565_s_at               | family with sequence similarity 26, member B                                                          | 1.73                        | 4.06x10 <sup>-2</sup> |                     |
| 219257_s_at               | sphingosine kinase 1                                                                                  | 1.72                        | 2.29x10 <sup>-2</sup> |                     |
| 220893_at                 | uncharacterized gastric protein ZA52P                                                                 | 1.72                        | 2.14x10 <sup>-2</sup> |                     |
| 203145_at                 | sperm associated antigen 5                                                                            | 1.71                        | 3.00x10 <sup>-2</sup> |                     |
| 218854_at                 | squamous cell carcinoma antigen recognized by T cells 2                                               | 1.70                        | 6.25x10 <sup>-3</sup> |                     |
| 219306_at                 | kinesin family member 15                                                                              | 1.69                        | 4.02x10 <sup>-2</sup> |                     |
| 215084_s_at               | leucine rich repeat containing 42                                                                     | 1.69                        | 2.39x10 <sup>-2</sup> | O                   |
| 218193_s_at               | golgi transport 1 homolog B ( <i>S. cerevisiae</i> )                                                  | 1.68                        | 2.39x10 <sup>-2</sup> | O                   |
| 205024_s_at               | RAD51 homolog (RecA homolog, <i>E. coli</i> ) ( <i>S. cerevisiae</i> )                                | 1.67                        | 3.15x10 <sup>-2</sup> |                     |
| AFFX-HUMGAPDH/M33197_5_at | glyceraldehyde-3-phosphate dehydrogenase                                                              | 1.65                        | 4.80x10 <sup>-2</sup> |                     |
| 214266_s_at               | PDZ and LIM domain 7 (enigma)                                                                         | 1.65                        | 3.04x10 <sup>-2</sup> |                     |
| 203594_at                 | RNA terminal phosphate cyclase domain 1                                                               | 1.64                        | 4.50x10 <sup>-2</sup> |                     |
| 220926_s_at               | chromosome 1 open reading frame 22                                                                    | 1.64                        | 1.51x10 <sup>-2</sup> |                     |
| 202338_at                 | thymidine kinase 1, soluble                                                                           | 1.64                        | 2.39x10 <sup>-2</sup> |                     |
| 203137_at                 | Wilms tumor 1 associated protein                                                                      | 1.64                        | 4.49x10 <sup>-2</sup> |                     |
| 213004_at                 | angiopoietin-like 2                                                                                   | 1.64                        | 4.02x10 <sup>-2</sup> |                     |
| 200897_s_at               | palladin                                                                                              | 1.60                        | 4.92x10 <sup>-2</sup> |                     |
| 201136_at                 | proteolipid protein 2 (colonic epithelium-enriched)                                                   | 1.60                        | 3.57x10 <sup>-2</sup> |                     |

**Supplemental Gene List IV. Transcriptomal Differences between Lung Adenocarcinoma (adenoCa) Patients with Poor Survival vs Those with Good Survival (cont. page 5)**

| Probe ID    | Gene name                                                                                    | OS<2yr vs OS>5yr in adenoCa |                       | Airway BC signature |
|-------------|----------------------------------------------------------------------------------------------|-----------------------------|-----------------------|---------------------|
|             |                                                                                              | Fold-change                 | p value               |                     |
| 200756_x_at | calumenin                                                                                    | 1.59                        | 2.65x10 <sup>-2</sup> |                     |
| 200776_s_at | basic leucine zipper and W2 domains 1 ; similar to basic leucine zipper and W2 domains 1     | 1.58                        | 3.15x10 <sup>-2</sup> |                     |
| 209709_s_at | hyaluronan-mediated motility receptor (RHAMM)                                                | 1.58                        | 4.08x10 <sup>-2</sup> |                     |
| 206796_at   | WNT1 inducible signaling pathway protein 1                                                   | 1.58                        | 3.15x10 <sup>-2</sup> |                     |
| 219874_at   | solute carrier family 12 (potassium/chloride transporters), member 8                         | 1.58                        | 2.14x10 <sup>-2</sup> |                     |
| 41037_at    | TEA domain family member 4                                                                   | 1.57                        | 4.43x10 <sup>-2</sup> | O                   |
| 208854_s_at | serine/threonine kinase 24 (STE20 homolog, yeast)                                            | 1.54                        | 2.46x10 <sup>-2</sup> |                     |
| 209091_s_at | SH3-domain GRB2-like endophilin B1                                                           | 1.53                        | 3.15x10 <sup>-2</sup> |                     |
| 208636_at   | Actinin, alpha 1                                                                             | 1.52                        | 3.15x10 <sup>-2</sup> | O                   |
| 202536_at   | chromatin modifying protein 2B                                                               | 1.52                        | 4.02x10 <sup>-2</sup> |                     |
| 201238_s_at | capping protein (actin filament) muscle Z-line, alpha 2                                      | 1.50                        | 3.70x10 <sup>-2</sup> |                     |
| 201486_at   | reticulocalbin 2, EF-hand calcium binding domain                                             | 1.49                        | 1.51x10 <sup>-2</sup> |                     |
| 208810_at   | DnaJ (Hsp40) homolog, subfamily B, member 6                                                  | 1.49                        | 2.39x10 <sup>-2</sup> |                     |
| 210639_s_at | ATG5 autophagy related 5 homolog (S. cerevisiae)                                             | 1.48                        | 2.39x10 <sup>-2</sup> |                     |
| 212021_s_at | antigen identified by monoclonal antibody Ki-67                                              | 1.45                        | 4.26x10 <sup>-2</sup> |                     |
| 221891_x_at | heat shock 70kDa protein 8                                                                   | 1.45                        | 2.32x10 <sup>-2</sup> |                     |
| 202897_at   | protein tyrosine phosphatase, non-receptor type substrate 1                                  | 1.44                        | 2.24x10 <sup>-2</sup> |                     |
| 201461_s_at | mitogen-activated protein kinase-activated protein kinase 2                                  | 1.43                        | 3.62x10 <sup>-2</sup> |                     |
| 211945_s_at | integrin, beta 1 (fibronectin receptor, beta polypeptide, antigen CD29 includes MDF2, MSK12) | 1.40                        | 4.59x10 <sup>-2</sup> | O                   |
| 201020_at   | tyrosine 3-monooxygenase/tryptophan 5-monooxygenase activation protein, eta polypeptide      | 1.38                        | 1.48x10 <sup>-2</sup> |                     |
| 205202_at   | protein-L-isoaspartate (D-aspartate) O-methyltransferase                                     | 1.37                        | 2.29x10 <sup>-2</sup> |                     |
| 200059_s_at | ras homolog gene family, member A ; ras homolog gene family, member A                        | 1.37                        | 3.21x10 <sup>-2</sup> |                     |
| 202142_at   | COP9 constitutive photomorphogenic homolog subunit 8 (Arabidopsis)                           | 1.34                        | 4.88x10 <sup>-2</sup> |                     |
| 214629_x_at | reticulon 4                                                                                  | 1.33                        | 4.22x10 <sup>-2</sup> |                     |
| 218803_at   | checkpoint with forkhead and ring finger domains                                             | 1.30                        | 3.46x10 <sup>-2</sup> |                     |
| 219540_at   | zinc finger protein 267                                                                      | 1.30                        | 5.17x10 <sup>-3</sup> |                     |

**Supplemental Gene List IV. Transcriptomal Differences between Lung Adenocarcinoma  
(adenoCa) Patients with Poor Survival vs Those with Good Survival (cont. page 6)**

| <b>Probe ID</b> | <b>Gene name</b>                                                                           | <b>OS&lt;2yr vs OS&gt;5yr in<br/>adenoCa</b> |                       | <b>Airway<br/>BC<br/>signature</b> |
|-----------------|--------------------------------------------------------------------------------------------|----------------------------------------------|-----------------------|------------------------------------|
|                 |                                                                                            | <b>Fold-<br/>change</b>                      | <b>p value</b>        |                                    |
| 201179_s_at     | guanine nucleotide binding protein (G protein),<br>alpha inhibiting activity polypeptide 3 | 1.28                                         | 3.15x10 <sup>-2</sup> |                                    |
| 202529_at       | phosphoribosyl pyrophosphate synthetase-<br>associated protein 1                           | 1.27                                         | 3.33x10 <sup>-2</sup> |                                    |

**Supplemental Gene List V. Differences in Airway BC-signature Gene Expression between  
BC-high Adenocarcinoma (adenoCa) vs Squamous Cell Carcinoma**

| Probe ID    | Gene name                                                                  | BC-high adenoCa vs SqCa |                       |
|-------------|----------------------------------------------------------------------------|-------------------------|-----------------------|
|             |                                                                            | Fold-change             | p value               |
| 209278_s_at | tissue factor pathway inhibitor 2                                          | 6.29                    | 1.92x10 <sup>-3</sup> |
| 209016_s_at | keratin 7                                                                  | 6.19                    | 1.26x10 <sup>-4</sup> |
| 203108_at   | G protein-coupled receptor, family C, group 5, member A                    | 3.61                    | 4.25x10 <sup>-4</sup> |
| 205239_at   | amphiregulin (schwannoma-derived growth factor)                            | 3.52                    | 1.25x10 <sup>-3</sup> |
| 222108_at   | adhesion molecule with Ig-like domain 2                                    | 3.52                    | 4.23x10 <sup>-5</sup> |
| 208161_s_at | ATP-binding cassette, sub-family C (CFTR/MRP), member 3                    | 3.26                    | 3.46x10 <sup>-5</sup> |
| 219032_x_at | opsin 3 (encephalopsin, panopsin)                                          | 2.93                    | 7.61x10 <sup>-4</sup> |
| 203939_at   | 5'-nucleotidase, ecto (CD73)                                               | 2.92                    | 1.25x10 <sup>-3</sup> |
| 209803_s_at | pleckstrin homology-like domain, family A, member 2                        | 2.89                    | 2.13x10 <sup>-5</sup> |
| 219045_at   | ras homolog gene family, member F (in filopodia)                           | 2.59                    | 7.15x10 <sup>-5</sup> |
| 209135_at   | aspartate beta-hydroxylase                                                 | 2.56                    | 8.17x10 <sup>-4</sup> |
| 212298_at   | neuropilin 1                                                               | 2.56                    | 2.96x10 <sup>-4</sup> |
| 205767_at   | epiregulin                                                                 | 2.37                    | 9.77x10 <sup>-3</sup> |
| 208892_s_at | dual specificity phosphatase 6                                             | 2.33                    | 7.92x10 <sup>-4</sup> |
| 205174_s_at | homeodomain-only protein                                                   | 2.32                    | 2.05x10 <sup>-2</sup> |
| 211597_s_at | glutaminy-peptide cyclotransferase (glutaminy cyclase)                     | 2.32                    | 4.62x10 <sup>-2</sup> |
| 206884_s_at | sciellin                                                                   | 2.27                    | 2.05x10 <sup>-2</sup> |
| 203910_at   | Rho GTPase activating protein 29                                           | 2.26                    | 3.09x10 <sup>-3</sup> |
| 201474_s_at | integrin, alpha 3 (antigen CD49C, alpha 3 subunit of VLA-3 receptor)       | 2.21                    | 1.49x10 <sup>-4</sup> |
| 203889_at   | carboxypeptidase M                                                         | 2.2                     | 3.48x10 <sup>-2</sup> |
| 206100_at   | secretory granule, neuroendocrine protein 1 (7B2 protein)                  | 2.2                     | 8.59x10 <sup>-3</sup> |
| 201818_at   | hypothetical protein FLJ12443                                              | 2.18                    | 5.44x10 <sup>-3</sup> |
| 202525_at   | protease, serine, 8 (prostasin)                                            | 2.14                    | 4.40x10 <sup>-4</sup> |
| 212473_s_at | microtubule associated monooxygenase, calponin and LIM domain containing 2 | 2.09                    | 1.46x10 <sup>-3</sup> |
| 213524_s_at | G0/G1switch 2                                                              | 2.08                    | 9.77x10 <sup>-3</sup> |
| 209457_at   | dual specificity phosphatase 5                                             | 2.07                    | 1.53x10 <sup>-3</sup> |
| 217875_s_at | transmembrane, prostate androgen induced RNA                               | 2.05                    | 1.95x10 <sup>-3</sup> |
| 218826_at   | solute carrier family 35, member F2                                        | 2.01                    | 1.40x10 <sup>-6</sup> |
| 202437_s_at | cytochrome P450, family 1, subfamily B, polypeptide 1                      | 1.98                    | 4.03x10 <sup>-2</sup> |
| 205234_at   | solute carrier family 16 (monocarboxylic acid transporters), member 4      | 1.98                    | 6.46x10 <sup>-3</sup> |
| 202949_s_at | regulator of G-protein signalling 10                                       | 1.96                    | 1.46x10 <sup>-3</sup> |
| 204319_s_at | four and a half LIM domains 2                                              | 1.96                    | 3.03x10 <sup>-3</sup> |

**Supplemental Gene List V. Differences in Airway BC-signature Gene Expression between  
BC-high Adenocarcinoma (adenoCa) vs Squamous Cell Carcinoma (cont. page 2)**

| Probe ID    | Gene name                                                                                    | BC-high adenoCa vs SqCa |                       |
|-------------|----------------------------------------------------------------------------------------------|-------------------------|-----------------------|
|             |                                                                                              | Fold-change             | p value               |
| 203510_at   | met proto-oncogene (hepatocyte growth factor receptor)                                       | 1.94                    | 8.63x10 <sup>-3</sup> |
| 218611_at   | immediate early response 5                                                                   | 1.87                    | 1.46x10 <sup>-3</sup> |
| 218309_at   | calcium/calmodulin-dependent protein kinase II inhibitor 1                                   | 1.84                    | 2.51x10 <sup>-2</sup> |
| 201666_at   | TIMP metalloproteinase inhibitor 1                                                           | 1.82                    | 1.79x10 <sup>-4</sup> |
| 218084_x_at | FXYD domain containing ion transport regulator 5                                             | 1.79                    | 1.51x10 <sup>-3</sup> |
| 203741_s_at | adenylate cyclase 7                                                                          | 1.77                    | 5.60x10 <sup>-3</sup> |
| 218368_s_at | tumor necrosis factor receptor superfamily, member 12A                                       | 1.76                    | 1.19x10 <sup>-2</sup> |
| 205180_s_at | ADAM metalloproteinase domain 8                                                              | 1.75                    | 8.59x10 <sup>-3</sup> |
| 214091_s_at | glutathione peroxidase 3 (plasma)                                                            | 1.73                    | 3.71x10 <sup>-2</sup> |
| 221510_s_at | glutaminase                                                                                  | 1.72                    | 4.62x10 <sup>-2</sup> |
| 212859_x_at | metallothionein 1E (functional)                                                              | 1.69                    | 2.13x10 <sup>-2</sup> |
| 201506_at   | caspase recruitment domain family, member 10                                                 | 1.68                    | 3.76x10 <sup>-2</sup> |
| 210026_s_at | transforming growth factor, beta-induced, 68kDa                                              | 1.68                    | 9.77x10 <sup>-3</sup> |
| 204255_s_at | cell cycle progression 1                                                                     | 1.67                    | 2.21x10 <sup>-3</sup> |
| 214866_at   | plasminogen activator, urokinase receptor                                                    | 1.67                    | 2.17x10 <sup>-3</sup> |
| 221156_x_at | vitamin D (1,25- dihydroxyvitamin D3) receptor                                               | 1.67                    | 2.13x10 <sup>-5</sup> |
| 218718_at   | platelet derived growth factor C                                                             | 1.66                    | 3.05x10 <sup>-2</sup> |
| 221059_s_at | coactosin-like 1 (Dictyostelium)                                                             | 1.64                    | 7.41x10 <sup>-3</sup> |
| 209295_at   | tumor necrosis factor receptor superfamily, member 10b                                       | 1.63                    | 3.24x10 <sup>-4</sup> |
| 205376_at   | inositol polyphosphate-4-phosphatase, type II, 105kDa                                        | 1.6                     | 9.77x10 <sup>-3</sup> |
| 201850_at   | capping protein (actin filament), gelsolin-like                                              | 1.59                    | 2.14x10 <sup>-2</sup> |
| 209264_s_at | tetraspanin 4                                                                                | 1.59                    | 2.95x10 <sup>-2</sup> |
| 200700_s_at | KDEL (Lys-Asp-Glu-Leu) endoplasmic reticulum protein retention receptor 2                    | 1.58                    | 4.47x10 <sup>-3</sup> |
| 203234_at   | uridine phosphorylase 1                                                                      | 1.56                    | 1.80x10 <sup>-2</sup> |
| 204135_at   | downregulated in ovarian cancer 1                                                            | 1.56                    | 4.82x10 <sup>-2</sup> |
| 203414_at   | monocyte to macrophage differentiation-associated                                            | 1.55                    | 8.17x10 <sup>-3</sup> |
| 212647_at   | sulfide quinone reductase-like (yeast)                                                       | 1.54                    | 3.31x10 <sup>-3</sup> |
| 217995_at   | zinc finger protein 281                                                                      | 1.54                    | 1.48x10 <sup>-2</sup> |
| 218401_s_at | related RAS viral (r-ras) oncogene homolog                                                   | 1.54                    | 5.22x10 <sup>-4</sup> |
| 211945_s_at | chromosome 1 open reading frame 116                                                          | 1.53                    | 6.25x10 <sup>-5</sup> |
| 213010_at   | integrin, beta 1 (fibronectin receptor, beta polypeptide, antigen CD29 includes MDF2, MSK12) | 1.53                    | 6.70x10 <sup>-3</sup> |
| 219856_at   | protein kinase C, delta binding protein                                                      | 1.53                    | 3.17x10 <sup>-2</sup> |
| 200733_s_at | acyl-CoA synthetase long-chain family member 4                                               | 1.51                    | 4.62x10 <sup>-2</sup> |
| 202422_s_at | protein tyrosine phosphatase type IVA, member 1                                              | 1.51                    | 2.34x10 <sup>-2</sup> |
| 200872_at   | S100 calcium binding protein A10 (annexin II ligand, calpactin I, light polypeptide (p11))   | 1.5                     | 2.72x10 <sup>-3</sup> |

**Supplemental Gene List V. Differences in Airway BC-signature Gene Expression between  
BC-high Adenocarcinoma (adenoCa) vs Squamous Cell Carcinoma (cont. page 3)**

| Probe ID    | Gene name                                                                                        | BC-high adenoCa vs SqCa |                       |
|-------------|--------------------------------------------------------------------------------------------------|-------------------------|-----------------------|
|             |                                                                                                  | Fold-change             | p value               |
| 207357_s_at | UDP-N-acetyl-alpha-D-galactosamine:polypeptide N-acetylgalactosaminyltransferase 10 (GalNAc-T10) | 1.5                     | 2.25x10 <sup>-3</sup> |
| 212242_at   | tubulin, alpha 1 (testis specific)                                                               | 1.49                    | 1.49x10 <sup>-2</sup> |
| 202686_s_at | ras-related C3 botulinum toxin substrate 2 (rho family, small GTP binding protein Rac2)          | 1.48                    | 3.13x10 <sup>-2</sup> |
| 213603_s_at | AXL receptor tyrosine kinase                                                                     | 1.48                    | 2.29x10 <sup>-2</sup> |
| 209589_s_at | melanoma cell adhesion molecule                                                                  | 1.47                    | 1.80x10 <sup>-2</sup> |
| 210869_s_at | EPH receptor B2                                                                                  | 1.47                    | 2.84x10 <sup>-2</sup> |
| 213230_at   | paraneoplastic antigen                                                                           | 1.47                    | 2.87x10 <sup>-2</sup> |
| 203650_at   | protein C receptor, endothelial (EPCR)                                                           | 1.46                    | 3.84x10 <sup>-2</sup> |
| 212845_at   | sterile alpha motif domain containing 4                                                          | 1.44                    | 3.17x10 <sup>-2</sup> |
| 212658_at   | lipoma HMGIC fusion partner-like 2                                                               | 1.42                    | 4.19x10 <sup>-3</sup> |
| 202006_at   | pyridoxal (pyridoxine, vitamin B6) kinase                                                        | 1.41                    | 2.48x10 <sup>-2</sup> |
| 203002_at   | sema domain, immunoglobulin domain (Ig), short basic domain, secreted, (semaphorin) 3B           | 1.41                    | 5.44x10 <sup>-3</sup> |
| 203071_at   | angiomin like 2                                                                                  | 1.41                    | 1.59x10 <sup>-2</sup> |
| 218018_at   | protein tyrosine phosphatase, non-receptor type 12                                               | 1.41                    | 9.69x10 <sup>-3</sup> |
| 219256_s_at | SH3 domain and tetratricopeptide repeats 1                                                       | 1.4                     | 4.62x10 <sup>-2</sup> |
| 200600_at   | follistatin-like 3 (secreted glycoprotein)                                                       | 1.39                    | 2.56x10 <sup>-2</sup> |
| 203592_s_at | moesin                                                                                           | 1.39                    | 9.44x10 <sup>-3</sup> |
| 218817_at   | signal peptidase complex subunit 3 homolog ( <i>S. cerevisiae</i> )                              | 1.39                    | 2.29x10 <sup>-2</sup> |
| 211980_at   | collagen, type IV, alpha 1                                                                       | 1.38                    | 2.47x10 <sup>-2</sup> |
| 202720_at   | tripartite motif-containing 5                                                                    | 1.37                    | 6.72x10 <sup>-3</sup> |
| 210705_s_at | testis derived transcript (3 LIM domains)                                                        | 1.37                    | 8.63x10 <sup>-3</sup> |
| 202655_at   | multiple coagulation factor deficiency 2                                                         | 1.36                    | 5.32x10 <sup>-3</sup> |
| 210970_s_at | GTP binding protein 2                                                                            | 1.36                    | 4.46x10 <sup>-3</sup> |
| 212245_at   | arginine-rich, mutated in early stage tumors                                                     | 1.36                    | 1.73x10 <sup>-3</sup> |
| 221050_s_at | inhibitor of Bruton agammaglobulinemia tyrosine kinase                                           | 1.36                    | 2.72x10 <sup>-3</sup> |
| 201980_s_at | Ras suppressor protein 1                                                                         | 1.35                    | 1.73x10 <sup>-2</sup> |
| 212739_s_at | non-metastatic cells 4, protein expressed in                                                     | 1.35                    | 4.82x10 <sup>-2</sup> |
| 52164_at    | chromosome 11 open reading frame 24                                                              | 1.34                    | 3.17x10 <sup>-2</sup> |
| 200788_s_at | multiple C2-domains with two transmembrane regions 1                                             | 1.32                    | 2.94x10 <sup>-2</sup> |
| 220122_at   | phosphoprotein enriched in astrocytes 15                                                         | 1.32                    | 2.05x10 <sup>-2</sup> |
| 204120_s_at | proline rich Gla (G-carboxyglutamic acid) 1                                                      | 1.3                     | 2.29x10 <sup>-2</sup> |
| 205618_at   | adenosine kinase                                                                                 | 1.3                     | 4.01x10 <sup>-2</sup> |
| 221739_at   | chromosome 19 open reading frame 10                                                              | 1.3                     | 1.09x10 <sup>-2</sup> |
| 200625_s_at | CAP, adenylate cyclase-associated protein 1 (yeast)                                              | 1.28                    | 4.14x10 <sup>-2</sup> |
| 208801_at   | signal recognition particle 72kDa                                                                | 1.27                    | 4.16x10 <sup>-2</sup> |
| 202787_s_at | BH3-only member B protein                                                                        | 1.24                    | 1.56x10 <sup>-2</sup> |

**Supplemental Gene List V. Differences in Airway BC-signature Gene Expression between  
BC-high Adenocarcinoma (adenoCa) vs Squamous Cell Carcinoma (cont. page 4)**

| Probe ID    | Gene name                                                                                    | BC-high adenoCa vs SqCa |                       |
|-------------|----------------------------------------------------------------------------------------------|-------------------------|-----------------------|
|             |                                                                                              | Fold-change             | p value               |
| 218775_s_at | mitogen-activated protein kinase-activated protein kinase 3                                  | 1.24                    | 3.84x10 <sup>-2</sup> |
| 209100_at   | interferon-related developmental regulator 2                                                 | 1.23                    | 2.29x10 <sup>-2</sup> |
| 201319_at   | myosin regulatory light chain MRCL3                                                          | 1.22                    | 4.55x10 <sup>-2</sup> |
| 209190_s_at | flightless I homolog (Drosophila)                                                            | 1.19                    | 3.50x10 <sup>-2</sup> |
| 212024_x_at | diaphanous homolog 1 (Drosophila)                                                            | 1.19                    | 1.32x10 <sup>-2</sup> |
| 34187_at    | RNA binding motif, single stranded interacting protein 2                                     | 1.15                    | 1.44x10 <sup>-2</sup> |
| 209544_at   | receptor-interacting serine-threonine kinase 2                                               | 1.14                    | 1.09x10 <sup>-2</sup> |
| 220198_s_at | eukaryotic translation initiation factor 5A2                                                 | 0.89                    | 2.29x10 <sup>-2</sup> |
| 218964_at   | AT rich interactive domain 3B (BRIGHT- like)                                                 | 0.88                    | 2.92x10 <sup>-2</sup> |
| 221414_s_at | defensin, beta 126 ; defensin, beta 126                                                      | 0.86                    | 9.34x10 <sup>-3</sup> |
| 205138_s_at | pleckstrin homology domain containing, family G (with RhoGef domain) member 3                | 0.85                    | 1.46x10 <sup>-3</sup> |
| 212821_at   | elongation of very long chain fatty acids (FEN1/Elo2, SUR4/Elo3, yeast)-like 4               | 0.85                    | 2.96x10 <sup>-3</sup> |
| 219532_at   | uronyl-2-sulfotransferase                                                                    | 0.85                    | 4.64x10 <sup>-2</sup> |
| 203597_s_at | WW domain binding protein 4 (formin binding protein 21)                                      | 0.83                    | 2.82x10 <sup>-2</sup> |
| 220484_at   | mucolipin 3                                                                                  | 0.82                    | 4.29x10 <sup>-3</sup> |
| 205493_s_at | dihydropyrimidinase-like 4                                                                   | 0.81                    | 7.97x10 <sup>-3</sup> |
| 211846_s_at | poliovirus receptor-related 1 (herpesvirus entry mediator C; nectin)                         | 0.79                    | 4.62x10 <sup>-2</sup> |
| 214095_at   | serine hydroxymethyltransferase 2 (mitochondrial)                                            | 0.78                    | 2.72x10 <sup>-3</sup> |
| 215411_s_at | TRAF3 interacting protein 2                                                                  | 0.78                    | 3.20x10 <sup>-2</sup> |
| 214595_at   | chromosome 8 open reading frame 20                                                           | 0.77                    | 5.57x10 <sup>-3</sup> |
| 218421_at   | potassium voltage-gated channel, subfamily G, member 1                                       | 0.77                    | 2.29x10 <sup>-2</sup> |
| 218777_at   | ceramide kinase                                                                              | 0.77                    | 9.77x10 <sup>-3</sup> |
| 206376_at   | ankyrin repeat domain 11                                                                     | 0.76                    | 5.57x10 <sup>-3</sup> |
| 219437_s_at | solute carrier family 6, member 15                                                           | 0.76                    | 2.26x10 <sup>-2</sup> |
| 220255_at   | Fanconi anemia, complementation group E                                                      | 0.76                    | 2.12x10 <sup>-3</sup> |
| 200924_s_at | solute carrier family 3 (activators of dibasic and neutral amino acid transport), member 2   | 0.75                    | 3.71x10 <sup>-2</sup> |
| 203297_s_at | Jumonji, AT rich interactive domain 2                                                        | 0.75                    | 8.63x10 <sup>-3</sup> |
| 203438_at   | stanniocalcin 2                                                                              | 0.74                    | 2.70x10 <sup>-2</sup> |
| 219038_at   | MORC family CW-type zinc finger 4                                                            | 0.74                    | 2.95x10 <sup>-2</sup> |
| 200951_s_at | pleckstrin homology domain containing, family A (phosphoinositide binding specific) member 1 | 0.71                    | 3.84x10 <sup>-2</sup> |
| 206832_s_at | mitogen-activated protein kinase 6                                                           | 0.71                    | 8.52x10 <sup>-3</sup> |
| 207121_s_at | sema domain, immunoglobulin domain (Ig), short basic domain, secreted, (semaphorin) 3F       | 0.71                    | 3.45x10 <sup>-2</sup> |
| 210237_at   | artemin                                                                                      | 0.71                    | 7.62x10 <sup>-3</sup> |



**Supplemental Gene List V. Differences in Airway BC-signature Gene Expression between  
BC-high Adenocarcinoma (adenoCa) vs Squamous Cell Carcinoma (cont. page 5)**

| Probe ID    | Gene name                                                                                       | BC-high adenoCa vs SqCa |                       |
|-------------|-------------------------------------------------------------------------------------------------|-------------------------|-----------------------|
|             |                                                                                                 | Fold-change             | p value               |
| 219024_at   | cyclin D2                                                                                       | 0.71                    | 3.13x10 <sup>-2</sup> |
| 202067_s_at | placental growth factor, vascular endothelial growth factor-related protein                     | 0.7                     | 3.21x10 <sup>-2</sup> |
| 209652_s_at | MICAL-like 1                                                                                    | 0.7                     | 4.69x10 <sup>-2</sup> |
| 219855_at   | low density lipoprotein receptor (familial hypercholesterolemia)                                | 0.7                     | 2.13x10 <sup>-5</sup> |
| 220892_s_at | nudix (nucleoside diphosphate linked moiety X)-type motif 11                                    | 0.7                     | 1.59x10 <sup>-2</sup> |
| 221779_at   | phosphoserine aminotransferase 1                                                                | 0.7                     | 3.66x10 <sup>-2</sup> |
| 204203_at   | CCAAT/enhancer binding protein (C/EBP), gamma                                                   | 0.69                    | 3.30x10 <sup>-2</sup> |
| 214431_at   | guanine monphosphate synthetase                                                                 | 0.68                    | 3.17x10 <sup>-2</sup> |
| 202755_s_at | schwannomin interacting protein 1                                                               | 0.67                    | 8.63x10 <sup>-3</sup> |
| 204030_s_at | glypican 1                                                                                      | 0.67                    | 2.68x10 <sup>-2</sup> |
| 215780_s_at | SET translocation (myeloid leukemia-associated)                                                 | 0.67                    | 7.91x10 <sup>-3</sup> |
| 206581_at   | basonuclin 1                                                                                    | 0.66                    | 2.08x10 <sup>-4</sup> |
| 201249_at   | fibulin 1                                                                                       | 0.65                    | 2.21x10 <sup>-3</sup> |
| 201787_at   | solute carrier family 2 (facilitated glucose transporter), member 1                             | 0.65                    | 7.89x10 <sup>-3</sup> |
| 202934_at   | hexokinase 2                                                                                    | 0.63                    | 3.19x10 <sup>-2</sup> |
| 203562_at   | fasciculation and elongation protein zeta 1 (zygin I)                                           | 0.63                    | 2.93x10 <sup>-2</sup> |
| 220664_at   | small proline-rich protein 2C                                                                   | 0.62                    | 3.17x10 <sup>-2</sup> |
| 206307_s_at | forkhead box D1                                                                                 | 0.61                    | 2.29x10 <sup>-2</sup> |
| 201656_at   | integrin, alpha 6                                                                               | 0.59                    | 4.69x10 <sup>-2</sup> |
| 204165_at   | WAS protein family, member 1                                                                    | 0.58                    | 1.16x10 <sup>-2</sup> |
| 206122_at   | SRY (sex determining region Y)-box 15                                                           | 0.58                    | 5.68x10 <sup>-4</sup> |
| 213358_at   | KIAA0802                                                                                        | 0.58                    | 5.11x10 <sup>-3</sup> |
| 201397_at   | meningioma (disrupted in balanced translocation) 1                                              | 0.57                    | 2.87x10 <sup>-4</sup> |
| 205330_at   | phosphoglycerate dehydrogenase                                                                  | 0.57                    | 4.39x10 <sup>-3</sup> |
| 202779_s_at | myeloid/lymphoid or mixed-lineage leukemia (trithorax homolog, Drosophila); translocated to, 11 | 0.54                    | 7.89x10 <sup>-3</sup> |
| 211071_s_at | ubiquitin-conjugating enzyme E2S                                                                | 0.54                    | 4.62x10 <sup>-2</sup> |
| 212190_at   | serpin peptidase inhibitor, clade E (nexin, plasminogen activator inhibitor type 1), member 2   | 0.53                    | 2.94x10 <sup>-2</sup> |
| 201667_at   | hepatoma-derived growth factor, related protein 3                                               | 0.49                    | 2.06x10 <sup>-2</sup> |
| 204136_at   | collagen, type VII, alpha 1 (epidermolysis bullosa, dystrophic, dominant and recessive)         | 0.49                    | 2.02x10 <sup>-4</sup> |
| 207382_at   | gap junction protein, alpha 1, 43kDa (connexin 43)                                              | 0.49                    | 4.30x10 <sup>-5</sup> |
| 209283_at   | tumor protein p73-like                                                                          | 0.49                    | 4.19x10 <sup>-3</sup> |
| 209524_at   | crystallin, alpha B                                                                             | 0.49                    | 6.26x10 <sup>-3</sup> |

**Supplemental Gene List V. Differences in Airway BC-signature Gene Expression between  
BC-high Adenocarcinoma (adenoCa) vs Squamous Cell Carcinoma (cont. page 6)**

| Probe ID    | Gene name                                                                  | BC-high adenoCa vs SqCa |                       |
|-------------|----------------------------------------------------------------------------|-------------------------|-----------------------|
|             |                                                                            | Fold-change             | p value               |
| 201387_s_at | ubiquitin carboxyl-terminal esterase L1 (ubiquitin thiolesterase)          | 0.48                    | 3.68x10 <sup>-2</sup> |
| 203786_s_at | tumor protein D52-like 1                                                   | 0.47                    | 1.19x10 <sup>-2</sup> |
| 212702_s_at | bicaudal D homolog 2 (Drosophila)                                          | 0.47                    | 5.55x10 <sup>-5</sup> |
| 213992_at   | collagen, type IV, alpha 6                                                 | 0.46                    | 5.68x10 <sup>-4</sup> |
| 207345_at   | follistatin                                                                | 0.45                    | 2.28x10 <sup>-6</sup> |
| 202912_at   | adrenomedullin                                                             | 0.44                    | 3.03x10 <sup>-3</sup> |
| 213139_at   | snail homolog 2 (Drosophila)                                               | 0.44                    | 1.56x10 <sup>-2</sup> |
| 202712_s_at | creatine kinase, mitochondrial 1B ; creatine kinase, mitochondrial 1A      | 0.42                    | 2.02x10 <sup>-4</sup> |
| 204614_at   | serpin peptidase inhibitor, clade B (ovalbumin), member 2                  | 0.41                    | 6.51x10 <sup>-3</sup> |
| 209800_at   | Rhesus blood group, C glycoprotein                                         | 0.41                    | 4.62x10 <sup>-2</sup> |
| 219554_at   | keratin 16 (focal non-epidermolytic palmoplantar keratoderma)              | 0.41                    | 3.70x10 <sup>-4</sup> |
| 216268_s_at | jagged 1 (Alagille syndrome)                                               | 0.4                     | 3.09x10 <sup>-3</sup> |
| 210355_at   | parathyroid hormone-like hormone                                           | 0.39                    | 1.37x10 <sup>-4</sup> |
| 203184_at   | fibrillin 2 (congenital contractural arachnodactyly)                       | 0.38                    | 1.02x10 <sup>-3</sup> |
| 207030_s_at | cysteine and glycine-rich protein 2                                        | 0.38                    | 2.08x10 <sup>-4</sup> |
| 202345_s_at | annexin A8                                                                 | 0.36                    | 1.43x10 <sup>-2</sup> |
| 203074_at   | fatty acid binding protein 5 (psoriasis-associated)                        | 0.36                    | 1.06x10 <sup>-2</sup> |
| 215812_s_at | solute carrier family 6 (neurotransmitter transporter, creatine), member 8 | 0.35                    | 1.07x10 <sup>-5</sup> |
| 204268_at   | serpin peptidase inhibitor, clade B (ovalbumin), member 5                  | 0.32                    | 3.87x10 <sup>-2</sup> |
| 204855_at   | S100 calcium binding protein A2                                            | 0.32                    | 1.90x10 <sup>-2</sup> |
| 208539_x_at | small proline-rich protein 2B                                              | 0.3                     | 2.06x10 <sup>-3</sup> |
| 210854_x_at | NADH:ubiquinone oxidoreductase MLRQ subunit homolog                        | 0.28                    | 5.49x10 <sup>-6</sup> |
| 218484_at   | solute carrier family 6 (neurotransmitter transporter, creatine), member 8 | 0.28                    | 1.55x10 <sup>-4</sup> |
| 205595_at   | desmoglein 3 (pemphigus vulgaris antigen)                                  | 0.25                    | 1.37x10 <sup>-4</sup> |
| 206561_s_at | aldo-keto reductase family 1, member B10 (aldose reductase)                | 0.23                    | 3.17x10 <sup>-2</sup> |
| 204455_at   | cystatin A (stefin A)                                                      | 0.19                    | 9.46x10 <sup>-4</sup> |
| 204971_at   | dystonin                                                                   | 0.19                    | 7.10x10 <sup>-4</sup> |
| 205064_at   | small proline-rich protein 3                                               | 0.18                    | 2.12x10 <sup>-3</sup> |
| 218990_s_at | small proline-rich protein 1B (cornifin)                                   | 0.18                    | 5.55x10 <sup>-5</sup> |
| 205157_s_at | keratin 17                                                                 | 0.17                    | 3.96x10 <sup>-3</sup> |
| 206032_at   | keratin 6B                                                                 | 0.13                    | 1.33x10 <sup>-5</sup> |
| 213680_at   | desmocollin 3                                                              | 0.13                    | 1.46x10 <sup>-3</sup> |

**Supplemental Gene List V. Differences in Airway BC-signature Gene Expression between  
BC-high Adenocarcinoma (adenoCa) vs Squamous Cell Carcinoma (cont. page 7)**

| Probe ID  | Gene name                                                                            | BC-high adenoCa vs SqCa |                       |
|-----------|--------------------------------------------------------------------------------------|-------------------------|-----------------------|
|           |                                                                                      | Fold-change             | p value               |
| 213796_at | plakophilin 1 (ectodermal dysplasia/skin fragility syndrome)                         | 0.12                    | 1.10x10 <sup>-4</sup> |
| 221854_at | small proline-rich protein 1A                                                        | 0.12                    | 8.01x10 <sup>-6</sup> |
| 209125_at | keratin 6A ; keratin 6C ; keratin 6E                                                 | 0.1                     | 4.25x10 <sup>-4</sup> |
| 201820_at | keratin 5 (epidermolysis bullosa simplex, Dowling-Meara/Kobner/Weber-Cockayne types) | 0.06                    | 6.08x10 <sup>-5</sup> |
